# Supplementary material
Source: publisher figshare collection journal article supplement (https://gsajournals.figshare.com/articles/dataset/_/14195492)
Supplement: Supplementary file 1 [file 1]

**S2 Extended Methods. Determination of the position of the *MAT $\alpha$ -LEU2* tagged repeat within the rDNA array**

**A) Schematic representation of the strategy to determine the position of the *MAT $\alpha$ -LEU2* tagged repeat within the rDNA array.** The *MAT $\alpha$ -LEU2* construct contains a single *Agel* restriction site, while the rDNA repeat contains none. Digestion of yeast chromosomes with *Agel* in untagged strains will liberate intact rDNA arrays. In strains where *MAT $\alpha$ -LEU2* has been integrated at the rDNA array, *Agel* digestion is expected to produce 2 or more rDNA fragments depending on the number of *MAT $\alpha$ -LEU2* units integrated into the rDNA array. The sizes of the rDNA fragments can be used to infer the relative position of the *MAT $\alpha$ -LEU2* tagged rDNA repeat within the array. The number and size of rDNA fragments can be analyzed by pulsed-field gel electrophoresis (PFGE) followed by Southern blotting to probe for the rDNA fragments.

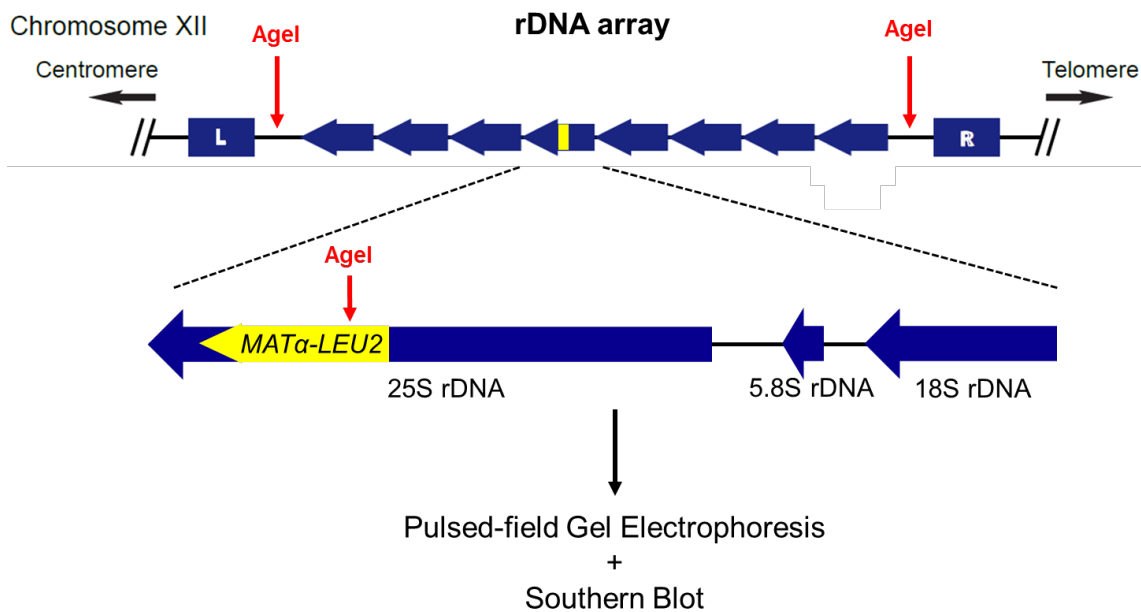

**B) Determination of the position of the *MAT $\alpha$ -LEU2* construct within the rDNA array in a subset of reporter strains used in this study.** Agel digested chromosomes from various reporter strains analyzed by pulsed-field gel electrophoresis, stained with GelRed (left), and Southern blot probed with a 25S rDNA fragment (right). M1 – Yeast chromosome PFG marker, M2 – Lambda PFG ladder (NEB), M3 – Lambda CHEF standard (BioRad). # - multiple biological replicates of *RDN25-MAT $\alpha$*  strain. \* - Isolates not used in this study. Fragment sizes (in kilobases) inferred from markers M1 and M3 are indicated. For M1 fragments, chromosomes that constitute the band are in parentheses.

*RDN25-MAT $\alpha$*  has one *MAT $\alpha$ -LEU2* unit inserted at one end of the array, ~5 repeats into the array. *RDN18-MAT $\alpha$*  has one *MAT $\alpha$ -LEU2* unit inserted at one end of the array, ~5 repeats into the array. *RDN58-MAT $\alpha$*  has one *MAT $\alpha$ -LEU2* unit inserted ~15 repeats into the array. *RDN25-MAT $\alpha$*  (reverse) has one *MAT $\alpha$ -LEU2* unit inserted in the middle of the array.

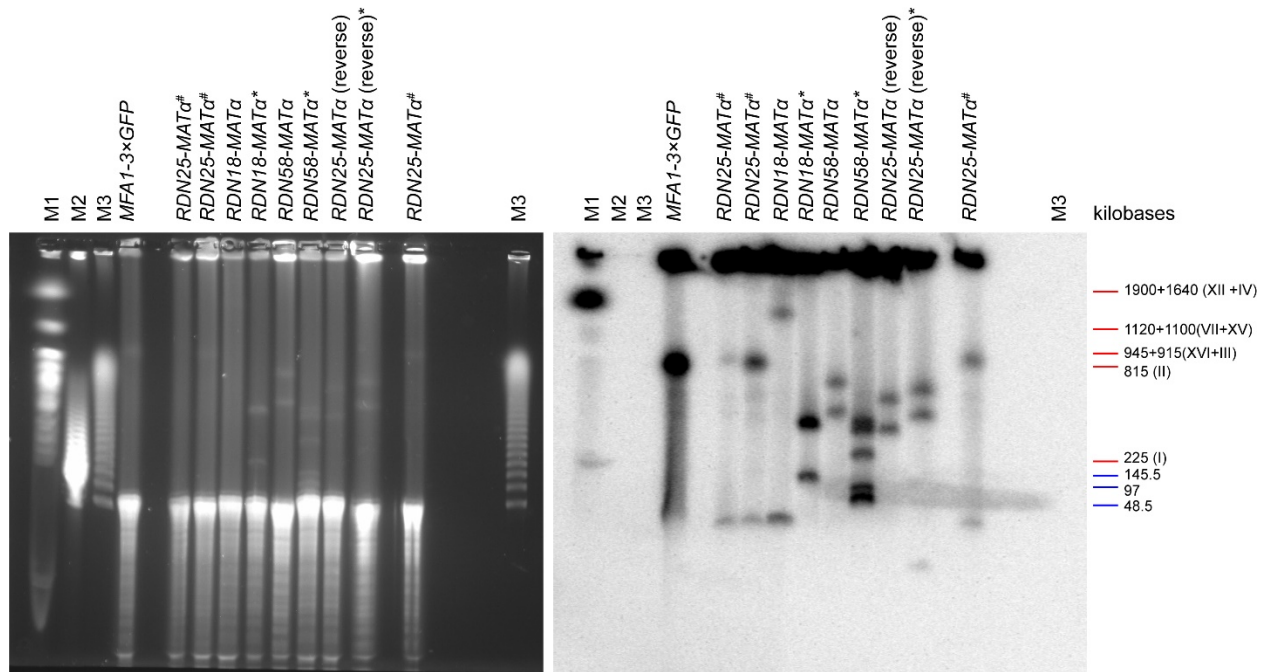

— Fragment sizes based on marker M1  
— Fragment sizes based on marker M3

### **C) Methods for PFGE and Southern blotting**

Preparation of cells, restriction enzyme digestion of chromosomes, and PFGE were carried out as described in (Ide & Kobayashi, 2010) with some modifications. Reporter strains were grown overnight in 5mL growth medium at 30°C. In the morning, cultures were diluted to OD600 ~0.1, and grown to OD600 ~0.3-0.5.  $\sim 8 \times 10^7$  cells were harvested and embedded in agarose plugs for PFGE. Restriction digestion of chromosomes with AgeI was carried out in the plugs at 37°C overnight. DNA fragments were separated on a 1% Pulsed-Field certified agarose (Bio-Rad) gel in 0.5x TBE using the CHEF-DR III Pulsed Field Electrophoresis System (Bio-Rad) at 6V/cm, with an included angle of 120°, and switch times 0.2-204s, for 15.2h at 14°C. Markers used were M1 - Yeast Chromosome PFG marker (NEB N0345), M2 - Lambda PFG Ladder (NEB N0341), and M3 – Lambda CHEF standard (BioRad 1703635). The gel was stained with 3x GelRed in 0.5x TBE, photographed, transferred on to a Amersham Hybond N+ membrane (GE Healthcare) and probed with a 25S rDNA fragment radiolabeled with  $\alpha$ -<sup>32</sup>P-dCTP. The blots were exposed to storage phosphor screens and imaged using a Typhoon 9400 imager (GE Healthcare).

### **References**

- Ide, S., & Kobayashi, T. (2010). Analysis of DNA replication in *Saccharomyces cerevisiae* by two-dimensional and pulsed-field gel electrophoresis. *Curr Protoc Cell Biol, Chapter 22*, Unit 22 14. doi:10.1002/0471143030.cb2214s49
