# Supplementary material
Source: publisher figshare collection journal article supplement (https://gsajournals.figshare.com/articles/dataset/_/14195492)
Supplement: Supplementary file 1 [file 1]

## Sheet: S5A) Initial screen 
Table S5. rDNA repeat loss rates and copy number measurements in the RDN25-MATα (+MoBY-ORF) library.
Data from initial screens, sorted by Plate number NP1-NP47 and EP1-EP13.
Key
	Control strains
BY4741	WT, no GFP tag
GFP+	MFA1-3xGFP
DES7	RDN25-MATα
p5472	RDN25-MATα + p5472
	ORF present in MoBY database, but not in our plasmid preps (no band on e-gel).
	Empty well in MoBY database, but growth in our preps.
	Strain moved from its original location in NP21 to NP19 to make room for controls and blank for OD measurement.
	"Low instability"; rDNA repeat loss rates < 0.00017
	"High instability"; rDNA repeat loss rates > 0.001
Plate	Well	Sample Name	Loss rate
NP1	A1	YML071C	0.00063067
NP1	A2	YML074C	0.00055503
NP1	A3	YML094W	0.00094856
NP1	A4	YML095C	0.000589953
NP1	A5	YML096W	0.000746489
NP1	A6	YML097C	0.000701899
NP1	A7	YML101C	0.000634302
NP1	A8	p5472	0.00060501
NP1	A9	YML106W	0.000747699
NP1	A10	YML107C	0.000610093
NP1	A11	YML108W	0.00070651
NP1	A12	YML109W	0.000632044
NP1	B1	YML110C	0.000704122
NP1	B2	YML111W	0.00194562
NP1	B3	YML113W	0.000778202
NP1	B4	YML116W	0.000440285
NP1	B5	YML117W	0.000613822
NP1	B6	YML118W	0.000624637
NP1	B7	YML120C	0.000598372
NP1	B8	YML121W	0.000766505
NP1	B9	YML129C	0.000839027
NP1	B10	GFP+
NP1	B11	YMR095C	0.000679744
NP1	B12	YMR096W	0.000720117
NP1	C1	YMR097C	0.000618337
NP1	C2	YMR099C	0.000582945
NP1	C3	YMR100W	0.000729405
NP1	C4	YMR106C	0.00055358
NP1	C5	YMR107W	0.00070884
NP1	C6	YMR108W	0.000754367
NP1	C7	YMR109W	0.000631972
NP1	C8	YMR110C	0.000847793
NP1	C9	YMR115W	0.000618773
NP1	C10	YMR120C	0.00129836
NP1	C11	YMR124W	0.0011044
NP1	C12	YMR125W	0.000732661
NP1	D1	YMR126C	0.000669073
NP1	D2	YMR127C	0.000654526
NP1	D3	YMR129W	0.000265978
NP1	D4	YMR130W	0.00076444
NP1	D5	YMR132C	0.000810524
NP1	D6	YMR133W	0.00071916
NP1	D7	YMR135C	0.00061615
NP1	D8	BY4741	0
NP1	D9	YCL038C	0.000920391
NP1	D10	YGL235W	0.000735991
NP1	D11	YJR070C	0.000819687
NP1	D12	YJR074W	0.000852279
NP1	E1	YJR077C	0.000482073
NP1	E2	YJR080C	0.000836903
NP1	E3	YJR084W	0.000689567
NP1	E4	YJR094W-A	0.000887845
NP1	E5	YJR095W	0.00083814
NP1	E6	YJR096W	0.000853027
NP1	E7	DES7	0.00217873
NP1	E8	YJR098C	0.000728885
NP1	E9	YJR099W	0.000522491
NP1	E10	YJR100C	0.000983036
NP1	E11	YJR116W	0.000424268
NP1	E12	YJR117W	0.000788188
NP1	F1	YJR118C	0.000856876
NP1	F2	YJR119C	0.000600435
NP1	F3	YJR120W	0.000726809
NP1	F4
NP1	F5	YJR133W	0.000663402
NP1	F6	YJR139C
NP1	F7	YJR140C	0.000312413
NP1	F8	YJR142W	0.000804017
NP1	F9	YJR144W	0.000555398
NP1	F10	YKL005C	0.00120835
NP1	F11	YLR146C	0.000944485
NP1	F12	YLR286C	0.000928035
NP1	G1	YLR343W	0.000712966
NP1	G2
NP1	G3
NP1	G4
NP1	G5	NP1-1	0.000438435
NP1	G6
NP1	G7
NP1	G8
NP1	G9
NP1	G10	NP1-2	0.000479575
NP1	G11
NP1	G12
NP1	H1
NP1	H2
NP1	H3
NP1	H4
NP1	H5
NP1	H6
NP1	H7
NP1	H8
NP1	H9
NP1	H10
NP1	H11
NP1	H12
NP2	A1	YAL064C-A	0.000584673
NP2	A2	YBL091C-A	0.000705308
NP2	A3	YBR269C	0.00615579
NP2	A4	YBR271W	0.000462152
NP2	A5	YBR191W	0.000884542
NP2	A6	YCL035C	0.000590146
NP2	A7	YDR074W	0.000758982
NP2	A8	YER027C	0.00109819
NP2	A9	YER037W	0.000482745
NP2	A10	YGR155W	0.000753198
NP2	A11	YLR192C	0.000677001
NP2	A12	YLR237W	0.000798556
NP2	B1	YLR246W	0.000700445
NP2	B2	YLR346C	0.000663134
NP2	B3	YLR361C	0.000757215
NP2	B4	YLR370C	0.000320578
NP2	B5	YLR394W	0.000541341
NP2	B6	YLR406C	0.000915304
NP2	B7	YML022W	0.00059322
NP2	B8	YML036W	0.000883203
NP2	B9	YML041C	0.000786448
NP2	B10	YML047C	0.00069977
NP2	B11	YML075C
NP2	B12	YML076C	0.000713999
NP2	C1	YML086C	0.00121023
NP2	C2	YMR048W	0.00085061
NP2	C3	YMR137C	0.000527911
NP2	C4	YMR138W	0.000740833
NP2	C5	YMR139W	0.000508924
NP2	C6	YMR160W	0.000577752
NP2	C7	YMR173W	0.000857194
NP2	C8	YMR198W	0.000907293
NP2	C9	YOR298C-A	0.000737207
NP2	C10	YPL148C
NP2	C11	YPL183C	0.000729081
NP2	C12	YPL183W-A	0.000889415
NP2	D1	YPL189W	0.000639201
NP2	D2	YPL224C	0.00191245
NP2	D3	YDR245W	0.000687983
NP2	D4	YDR247W	0.000292016
NP2	D5	YDR248C	0.000688501
NP2	D6	YDR249C	0.000232272
NP2	D7	YDR251W	0.00066533
NP2	D8	YDR252W	0.000998401
NP2	D9	YDR253C	0.000882902
NP2	D10	YDR254W	0.00118038
NP2	D11	YDR255C	0.000560237
NP2	D12	YDR256C	0.000526103
NP2	E1	YDR257C	0.000480974
NP2	E2	p5472	0.000454487
NP2	E3	YDR259C	0.000424401
NP2	E4	GFP+
NP2	E5	YDR261C	0.000326127
NP2	E6	YDR262W	0.00070596
NP2	E7	YDR263C	0.000354011
NP2	E8	YDR264C	0.000475044
NP2	E9	YDR265W
NP2	E10	YDR266C	0.000746583
NP2	E11	YDR268W	0.00119555
NP2	E12	YDR270W	0.0006544
NP2	F1	YDR272W	0.000970371
NP2	F2	YDR273W	0.000805788
NP2	F3	YDR275W	0.000573656
NP2	F4	YDR276C	0.000744814
NP2	F5	YDR277C	0.000781815
NP2	F6	YDR279W	0.000851986
NP2	F7	YDR284C	0.000312924
NP2	F8	YDR286C	0.00166742
NP2	F9	YDR287W	0.000566047
NP2	F10	YDR289C	0.00106826
NP2	F11	BY4741	0
NP2	F12	YDR294C	0.00123038
NP2	G1	YDR295C	0.000621286
NP2	G2	YDR296W	0.00116366
NP2	G3	YDR297W	0.000297983
NP2	G4	YDR300C	0.000452867
NP2	G5	YDR304C	0.000676418
NP2	G6	YDR305C	0.00141784
NP2	G7	YDR306C	0.00105179
NP2	G8	YDR307W	0.0010506
NP2	G9	YDR309C	0.000312187
NP2	G10	YDR310C	0.00114635
NP2	G11	YDR312W	0.000277078
NP2	G12	YDR314C	0.000858982
NP2	H1	YDR316W	0.000662089
NP2	H2	YDR317W	0.00120496
NP2	H3	YDR318W	0.000786293
NP2	H4	YDR320C	0.000707014
NP2	H5	YDR321W	0.000653222
NP2	H6	YDR322W	0.000814741
NP2	H7	YDR323C	0.000661668
NP2	H8	DES7	0.00240532
NP2	H9	YDR330W	0.00031005
NP2	H10	YDR332W	0.000277268
NP2	H11
NP2	H12	YDR337W	0.00334965
NP3	A1	YBR273C	0.000257808
NP3	A2	YBR281C	0.000608578
NP3	A3	YBR282W	0.000453269
NP3	A4	YBR284W
NP3	A5	YBR285W	0.000232917
NP3	A6	YBR297W	0.000297035
NP3	A7	YCR026C	0.000219563
NP3	A8	YCR028C	0.000599349
NP3	A9	YCR037C	0.000312482
NP3	A10	YCR051W	0.000527311
NP3	A11	YCR059C	0.00177845
NP3	A12	YCR065W	0.000311941
NP3	B1	YCR068W	0.000257297
NP3	B2	YCR077C	0.000256021
NP3	B3	YCR081W
NP3	B4	YCR087C-A	0.000288559
NP3	B5	YEL012W	0.00073761
NP3	B6	YER031C	0.000184017
NP3	B7	YER046W	0.000389693
NP3	B8	YER063W	0.000275675
NP3	B9	YER066W	0.000395472
NP3	B10	YGR188C	0.000630956
NP3	B11	YGR201C	0.000319087
NP3	B12	YGR204W	0.000985399
NP3	C1	YHL002W
NP3	C2	YHL011C	0.00025405
NP3	C3	YHL039W	0.000837916
NP3	C4	YHR003C	0.000234112
NP3	C5	YHR004C	0.000202914
NP3	C6	YHR005C	0.000106339
NP3	C7	YHR006W	0.00103236
NP3	C8	YHR008C	0.000347687
NP3	C9	YHR009C	0.000457866
NP3	C10	YHR025W	0.000281074
NP3	C11	YHR059W	0.0011121
NP3	C12	YHR067W	0.000232596
NP3	D1	YHR127W	0.000569944
NP3	D2	YHR131C	0.000150847
NP3	D3	YHR185C	0.000483346
NP3	D4	p5472	0.000704873
NP3	D5	YLL007C	0.000760985
NP3	D6	YMR154C	0.000340713
NP3	D7	YNL274C	0.00319141
NP3	D8	YOL141W	0.000255458
NP3	D9	YOL143C	0.000440152
NP3	D10	YOL158C	0.000404258
NP3	D11	YOL159C	0.000307446
NP3	D12	YOL162W	0.000633032
NP3	E1	YOL163W	0.000448084
NP3	E2	YOR008C-A	0.000303846
NP3	E3	YFL060C	0.000472022
NP3	E4	YJL103C	0.000294157
NP3	E5	YML073C	0.000475998
NP3	E6	YNL018C	0.000446663
NP3	E7	YNL047C	0.000309014
NP3	E8	YNL053W	0.000374324
NP3	E9	YNL055C	0.000458419
NP3	E10	YNL059C	0.000440474
NP3	E11	YNL069C	0.000241515
NP3	E12	YNL086W	0.000533826
NP3	F1	YNL096C	0.000778769
NP3	F2	YNL111C	0.000563187
NP3	F3	YNL147W	0.000501298
NP3	F4	YNL220W	0.000578825
NP3	F5	GFP+
NP3	F6	YNL284C	0.000489795
NP3	F7	YNR033W	0.00103053
NP3	F8	YPL158C	0.000281535
NP3	F9	YPL194W	0.000244038
NP3	F10	YPR011C	0.00054969
NP3	F11	YPR021C	0.00249298
NP3	F12	YPR083W	0.000442602
NP3	G1	YPR118W	0.000902212
NP3	G2	YPR133W-A	0.000562461
NP3	G3	YPR151C	0.000399827
NP3	G4	BY4741	0
NP3	G5	YDR347W	0.000462335
NP3	G6	YDR348C	0.000664619
NP3	G7	YDR349C	0.00171076
NP3	G8	YDR350C	0.000678787
NP3	G9	DES7	0.00188918
NP3	G10	YDR352W	0.000227721
NP3	G11	YDR354W	0.000230742
NP3	G12	YDR358W	0.000214074
NP3	H1	YDR359C	0.000344542
NP3	H2
NP3	H3	YDR368W
NP3	H4	YDR370C	0.00131437
NP3	H5	YDR371W	0.000438938
NP3	H6	YDR372C	0.000590378
NP3	H7	YDR377W	0.000291322
NP3	H8	YDR378C	0.000257198
NP3	H9	YDR379W	0.000241582
NP3	H10
NP3	H11	YDR382W
NP3	H12	YDR383C
NP4	A1	YDR384C	0.000356223
NP4	A2	YDR385W	0.000329341
NP4	A3	YDR386W	-0.000286961
NP4	A4	YDR387C	0.000271675
NP4	A5	YDR388W	0.000316803
NP4	A6	YDR389W	0.000203153
NP4	A7	YDR391C	0.000380384
NP4	A8	YDR393W	0.000409429
NP4	A9	YDR395W	0.00049465
NP4	A10	YDR399W	0.000297026
NP4	A11	YDR400W	0.000334708
NP4	A12	p5472	0.000468776
NP4	B1	YDR405W	0.000292979
NP4	B2	YDR409W	0.000316651
NP4	B3	YDR410C	0.000409224
NP4	B4	YDR411C	0.000317493
NP4	B5	YDR418W	0.000271777
NP4	B6	GFP+
NP4	B7	YDR421W	0.000303427
NP4	B8	YDR422C	0.000222729
NP4	B9	YDR423C	0.000668523
NP4	B10	YDR425W	0.000320663
NP4	B11	YDR428C	0.00044215
NP4	B12	YDR430C	0.00029596
NP4	C1	YDR432W	0.000277385
NP4	C2	YDR435C	0.000368912
NP4	C3	YDR436W	0.000320401
NP4	C4	YHR142W	0.000314906
NP4	C5	YHR143W	0.00199527
NP4	C6	YHR147C	0.000703365
NP4	C7	YHR151C	0.00058574
NP4	C8	YHR152W	0.000826106
NP4	C9	YHR153C	0.000424788
NP4	C10	YHR156C	0.000410158
NP4	C11	YHR157W	0.000353661
NP4	C12	YHR159W	0.000316168
NP4	D1	YHR160C	0.000180017
NP4	D2	YHR161C	0.000208957
NP4	D3	YHR163W	0.00125142
NP4	D4	YHR167W	0.000412959
NP4	D5	YHR176W	6.79804e-05
NP4	D6	YHR177W	0.000310179
NP4	D7	BY4741	0
NP4	D8	YHR182W	0.000384607
NP4	D9	YHR183W	0.000366642
NP4	D10	YHR184W	0.000382032
NP4	D11	YHR189W	0.000377831
NP4	D12	YHR195W	0.00030921
NP4	E1	YHR198C	0.000295494
NP4	E2	YHR199C	0.000484072
NP4	E3	YHR200W	0.000398497
NP4	E4	YHR202W
NP4	E5	YHR203C	0.00139276
NP4	E6	YHR204W	0.000359781
NP4	E7	YHR206W	0.000276056
NP4	E8	YHR209W	0.000365008
NP4	E9	YHR210C	0.000602537
NP4	E10
NP4	E11	YIL005W
NP4	E12	YIL011W
NP4	F1	DES7	0.00177589
NP4	F2	YIL015W	0.000232853
NP4	F3	YIL016W	0.000349313
NP4	F4	YIL017C	0.000918841
NP4	F5	YIL020C	0.000299778
NP4	F6	YIL024C	0.000281526
NP4	F7	YIL027C	0.000365248
NP4	F8	YIL029C	0.000543536
NP4	F9	YIL034C	0.00050675
NP4	F10	YIL035C	0.000333137
NP4	F11	YIL036W	0.000326656
NP4	F12	YIL037C	0.000254751
NP4	G1	YIL039W	0.000262519
NP4	G2	YIL040W	0.000322077
NP4	G3	YIL043C	0.000533654
NP4	G4	YIL044C	0.000869007
NP4	G5	YIL045W	0.000279355
NP4	G6	YIL049W	0.000535983
NP4	G7	YIL050W	0.000932716
NP4	G8	YIL053W
NP4	G9	YIL057C	0.000397563
NP4	G10	YIL064W	0.000303687
NP4	G11	YIL065C	0.000265902
NP4	G12	YIL072W
NP4	H1	YIL073C
NP4	H2	YIL076W	0.000240449
NP4	H3	YIL077C	0.000247449
NP4	H4	YIL084C	0.000734559
NP4	H5	YIL087C	0.00025329
NP4	H6	YIL088C	0.00073329
NP4	H7	YIL090W	0.000628713
NP4	H8	YIL093C	0.000452817
NP4	H9	YIL095W	0.000601453
NP4	H10	YIL096C
NP4	H11	YIL097W
NP4	H12
NP5	A1	YIL006W	0.000580447
NP5	A2	YIL007C	0.000286242
NP5	A3	YIL008W	0.000417845
NP5	A4	YIL009W	0.000453876
NP5	A5	YIL010W	0.00102877
NP5	A6	p5472	0.000910365
NP5	A7	YIL038C	0.000466139
NP5	A8	YIL042C	0.00081481
NP5	A9	YIL052C	0.000585644
NP5	A10	YIL055C
NP5	A11	YIL056W	0.000398536
NP5	A12	YIL060W	0.00114302
NP5	B1	YIL066C	0.000387284
NP5	B2	YIL067C	0.000439481
NP5	B3	YIL069C	0.000760463
NP5	B4	YIL070C	0.000340996
NP5	B5	YIL071C	0.000344258
NP5	B6	YIL074C	0.000347806
NP5	B7	YIL085C	0.00144961
NP5	B8	YIL089W	0.000393548
NP5	B9	YIL094C	0.000967354
NP5	B10	YIL098C	0.000611779
NP5	B11	YIL099W	0.000326565
NP5	B12	YIL101C	0.000266461
NP5	C1	YIL102C	0.000418637
NP5	C2	YIL103W	0.00079163
NP5	C3	YIL108W	0.000369786
NP5	C4	YIL110W	0.000562244
NP5	C5	YIL111W	0.00044705
NP5	C6	YIL114C	0.000360077
NP5	C7	YIL116W	0.000873515
NP5	C8	YIL117C	0.00031784
NP5	C9	GFP+
NP5	C10	YIL120W	0.00101954
NP5	C11	YIL121W	0.00113921
NP5	C12	YIL122W	0.00045227
NP5	D1	YIL123W	0.000401756
NP5	D2	YIL124W	0.00052876
NP5	D3	YIL128W	0.000461547
NP5	D4	BY4741	0
NP5	D5	YIL132C	0.000515229
NP5	D6	YIL133C	0.000407666
NP5	D7	YIL135C
NP5	D8	YIL136W	0.000360292
NP5	D9
NP5	D10	YIL138C	0.000781968
NP5	D11	YIL139C	0.00163985
NP5	D12	YIL140W	0.000324675
NP5	E1	YIL145C	0.000611903
NP5	E2	YIL146C	0.00037794
NP5	E3	YIL148W	0.000439888
NP5	E4	YIL149C	0.000377962
NP5	E5	YIL152W	0.000649063
NP5	E6	YIL153W	0.000412588
NP5	E7	YIL154C	0.000371052
NP5	E8	YIL155C	0.00032932
NP5	E9	YIL157C	0.000459525
NP5	E10	YIL159W	0.00108967
NP5	E11	YIL160C	0.000248908
NP5	E12	YIL161W	0.000553503
NP5	F1	YIL162W	0.000549767
NP5	F2	YIL164C	0.000267235
NP5	F3	YIL165C	0.0015317
NP5	F4	YIL166C	0.000839699
NP5	F5	YIL173W	0.000838482
NP5	F6	YIR001C	0.000886593
NP5	F7	YIR003W	0.000362432
NP5	F8	YIR004W	0.000688336
NP5	F9	YIR005W	0.000614873
NP5	F10	YIR009W	0.000328546
NP5	F11	YIR013C	0.000486512
NP5	F12	YIR014W	0.000358191
NP5	G1	YIR016W	0.000542982
NP5	G2	YJL218W	0.000653229
NP5	G3	YJL217W	0.00076857
NP5	G4	DES7	0.00230314
NP5	G5	YJL214W	0.0003595
NP5	G6	YJL210W	0.000690191
NP5	G7	YJL208C	0.000670159
NP5	G8	YJL204C	0.000594001
NP5	G9	YJL201W	0.000671164
NP5	G10	YJL192C	0.000884329
NP5	G11	YJL190C	0.000322327
NP5	G12	YJL187C	0.000299724
NP5	H1	YJL185C	0.000255971
NP5	H2	YJL183W	0.000362157
NP5	H3	YJL180C	0.000438025
NP5	H4	YJL179W	0.000348734
NP5	H5	YJL178C	0.000339486
NP5	H6	YJL176C	0.000570573
NP5	H7	YJL171C	0.000788421
NP5	H8	YJL166W	0.000536973
NP5	H9
NP5	H10	YJL159W	0.000631685
NP5	H11	YJL158C	0.000285094
NP5	H12	YJL155C	0.000332606
NP6	A1	YJL148W	0.00030756
NP6	A2	YJL146W	0.000155124
NP6	A3	YJL145W	7.84362e-05
NP6	A4	YJL144W	0.000301434
NP6	A5	YJL133W	0.00059261
NP6	A6	YJL131C	0.000708017
NP6	A7	YDR049W	0.000197484
NP6	A8	YDR051C	0.000421937
NP6	A9	YDR056C	0.000311722
NP6	A10	YDR057W	0.00111089
NP6	A11	YDR059C	0.000336886
NP6	A12	YDR061W	0.000330517
NP6	B1	YDR063W	0.000351533
NP6	B2	YDR065W	0.000387797
NP6	B3	YDR066C	0.000422945
NP6	B4	YDR067C	0.000536062
NP6	B5	YDR068W	0.000528113
NP6	B6	YDR070C	0.000443479
NP6	B7	YDR072C	0.000386627
NP6	B8	YDR073W	0.000376391
NP6	B9	YDR076W	0.000436499
NP6	B10	YDR077W	0.000679151
NP6	B11	YDR078C	0.00048311
NP6	B12	YDR079W	0.000613064
NP6	C1	YDR080W	0.000237283
NP6	C2	YDR083W	0.000410857
NP6	C3	YDR084C	0.000401455
NP6	C4	YDR085C	0.000336209
NP6	C5	YDR090C	0.000462513
NP6	C6
NP6	C7	YDR096W	0.000556834
NP6	C8	YDR098C
NP6	C9	YDR099W	0.000901383
NP6	C10	YDR100W	0.00150486
NP6	C11	YDR101C	0.000389027
NP6	C12	YDR103W
NP6	D1	YDR104C	0.000259562
NP6	D2	p5472	0.000439109
NP6	D3	YDR107C	0.000363823
NP6	D4	YDR108W	0.000383221
NP6	D5	YDR109C	0.000302443
NP6	D6	YDR110W	0.000301166
NP6	D7	GFP+
NP6	D8	YDR115W	0.000378816
NP6	D9	YDR116C	0.000359799
NP6	D10	YDR117C	0.000552954
NP6	D11	BY4741	0
NP6	D12	YDR120C	0.00040692
NP6	E1	YDR121W	0.000298205
NP6	E2
NP6	E3	YDR123C	-0.000133491
NP6	E4	YDR124W	0.000351859
NP6	E5	YDR125C	0.000300277
NP6	E6
NP6	E7	YDR128W	0.000390471
NP6	E8	YDR130C	0.000389348
NP6	E9	YDR131C	0.000369394
NP6	E10
NP6	E11
NP6	E12	YDR137W	0.00026738
NP6	F1	YDR138W	0.00029102
NP6	F2	YDR139C	0.000289881
NP6	F3	YDR142C	4.90024e-05
NP6	F4	YDR143C	0.000444999
NP6	F5	YDR146C	0.000277347
NP6	F6	DES7	0.00198631
NP6	F7	YFL028C	0.000179844
NP6	F8	YFL030W	0.000494062
NP6	F9
NP6	F10
NP6	F11	YFL046W	0.000436151
NP6	F12	YFL047W	0.000457144
NP6	G1	YFL049W	0.000354762
NP6	G2	YFL050C	0.000361679
NP6	G3	YFL051C	0.000383742
NP6	G4	YFL052W	0.000397457
NP6	G5	YFL053W	0.000612719
NP6	G6	YFL054C	0.000347816
NP6	G7	YFL055W	0.000387624
NP6	G8	YFL056C	0.000285272
NP6	G9	YFR001W
NP6	G10	YFR006W	0.000243682
NP6	G11	YFR009W	-9.3328e-05
NP6	G12	YFR015C	0.000352545
NP6	H1	YFR016C
NP6	H2	YFR017C	0.000360549
NP6	H3	YFR022W	0.000272458
NP6	H4	YFR023W	0.0002688
NP6	H5	YFR031C-A	0.000397588
NP6	H6
NP6	H7
NP6	H8
NP6	H9
NP6	H10
NP6	H11
NP6	H12
NP7	A1	YJR073C	0.000512804
NP7	A2	YJR075W	0.000417161
NP7	A3	YJR078W	0.000421804
NP7	A4	YJR079W	0.000610329
NP7	A5	YJR082C	0.000310092
NP7	A6	YJR083C	0.000343804
NP7	A7	YJR088C	0.00025634
NP7	A8	YJR092W	0.000243757
NP7	A9	YJR102C	0.000658861
NP7	A10	YJR103W	0.000455486
NP7	A11	YJR105W	0.000481279
NP7	A12	YJR108W	0.000336587
NP7	B1	YJR110W	0.000378793
NP7	B2	p5472	0.000520085
NP7	B3	YJR115W	0.000456959
NP7	B4	YJR127C	0.000503463
NP7	B5	YJR129C	0.000580776
NP7	B6	YJR130C	0.000613751
NP7	B7	YJR135C	0.000351586
NP7	B8	YJR137C	0.000487667
NP7	B9	YJR147W	0.000619424
NP7	B10
NP7	B11	YJR152W	2.28173e-05
NP7	B12	YJR154W	0.000389889
NP7	C1	YKL002W	0.000529003
NP7	C2	YKL006W	0.000327674
NP7	C3	YKL008C	0.000827063
NP7	C4	YKL010C	0.000526114
NP7	C5	YKL011C	0.000961269
NP7	C6	YKL016C	0.000507522
NP7	C7	YKL017C	0.00050249
NP7	C8	YKL020C	0.000455679
NP7	C9	YKL023W	0.000316038
NP7	C10	YKL025C	0.000500218
NP7	C11	YKL026C	0.000275175
NP7	C12	YKL027W	0.000517619
NP7	D1	GFP+
NP7	D2	YKL037W	0.000641611
NP7	D3	YKL039W	0.000393357
NP7	D4	YKL040C	0.000462366
NP7	D5	YKL041W	-4.22145e-05
NP7	D6	YKL043W	0.000690356
NP7	D7	YKL046C	0.000450476
NP7	D8	YKL047W	0.000566145
NP7	D9	YKL048C	0.000401338
NP7	D10	YKL050C	0.000437872
NP7	D11	YKL051W	0.000434569
NP7	D12	BY4741	0
NP7	E1	YKL056C	0.000344531
NP7	E2	YKL057C	0.000753784
NP7	E3	YKL061W	0.000225
NP7	E4	YKL062W	0.000433358
NP7	E5	YKL063C	0.000341775
NP7	E6	YKL064W	0.000461312
NP7	E7	YKL067W	0.000700474
NP7	E8	YKL068W	0.000487204
NP7	E9	YKL069W	0.000453246
NP7	E10	YKL070W	0.000484817
NP7	E11	YKL071W	0.00018261
NP7	E12	YKL072W	0.000387505
NP7	F1	YKL074C	0.000414701
NP7	F2	YKL075C	0.000390244
NP7	F3	YKL077W	0.000486695
NP7	F4	YKL079W	0.000753098
NP7	F5	YKL080W	0.000258316
NP7	F6	YKL081W	0.000369467
NP7	F7	YKL084W	0.000493295
NP7	F8	YKL085W	0.000975289
NP7	F9	YKL086W	0.000490555
NP7	F10	DES7	0.00207128
NP7	F11	YKL093W	0.000381664
NP7	F12	YKL094W	0.000603214
NP7	G1	YKL096W	0.000333116
NP7	G2	YKL098W	0.000417289
NP7	G3	YKL100C	0.000396361
NP7	G4	YKL101W	0.000512849
NP7	G5	YKL103C	0.000445054
NP7	G6	YKL107W	0.000737341
NP7	G7	YKL109W	0.00172217
NP7	G8	YKL110C	0.000414778
NP7	G9	YKL113C	0.000423617
NP7	G10	YKL116C	0.000333932
NP7	G11	YKL117W	0.00077293
NP7	G12	YKL119C	0.000338005
NP7	H1	YKL120W	0.000503715
NP7	H2	YKL124W	0.0002287
NP7	H3	YKL126W	0.000384094
NP7	H4	YKL130C	0.000454168
NP7	H5	YKL132C	0.000668465
NP7	H6	YKL133C	0.000465707
NP7	H7	YKL134C	0.000795761
NP7	H8	YKL135C	0.000773314
NP7	H9	YKL138C	0.000370886
NP7	H10	YKL140W	0.000516404
NP7	H11	YKL142W
NP7	H12	YKL143W	0.00036659
NP8	A1	YKL146W	0.000206015
NP8	A2	YKL149C	0.000363254
NP8	A3	YKL155C	0.000361614
NP8	A4	YKL156W	0.000462267
NP8	A5	YKL160W	0.000444117
NP8	A6	YKL162C	0.000380039
NP8	A7	YKL167C	0.000857489
NP8	A8	YKL170W	0.000696473
NP8	A9	YKL190W	0.000382587
NP8	A10	YKL198C	0.000366059
NP8	A11	YKL206C	0.000343937
NP8	A12	YKL207W	0.000446073
NP8	B1	YKL208W	0.00031355
NP8	B2	YKL211C	0.000414998
NP8	B3	p5472	0.000427966
NP8	B4	YKL214C	0.000399181
NP8	B5	YKL216W	0.000448396
NP8	B6	YKL217W	0.000369478
NP8	B7	YKL221W	0.000610123
NP8	B8	YKL222C	0.000421744
NP8	B9	GFP+
NP8	B10	YKR003W	0.000439321
NP8	B11	YKR005C	0.000589928
NP8	B12
NP8	C1	YKR007W	0.000369759
NP8	C2	YKR011C	0.000406839
NP8	C3	YKR013W	0.000430648
NP8	C4	YKR015C	0.000342026
NP8	C5	YKR016W	0.000589568
NP8	C6	YKR018C	0.000642996
NP8	C7	YKR020W	0.000620244
NP8	C8	YKR024C	0.000416928
NP8	C9	YKR030W	0.000564896
NP8	C10	YKR043C	0.000458856
NP8	C11	BY4741	0
NP8	C12	YKR045C	0.000435074
NP8	D1	YKR048C	0.000270218
NP8	D2	YKR049C	0.000322575
NP8	D3	YKR051W	0.000200222
NP8	D4	YKR052C	0.000364243
NP8	D5	YKR055W	0.000333421
NP8	D6	YKR058W	0.000620691
NP8	D7	YKR059W	0.000368289
NP8	D8	YKR061W	0.00114675
NP8	D9	YKR065C	0.000466979
NP8	D10	YLR420W	0.000452758
NP8	D11	YLR126C	0.000352277
NP8	D12	YLR128W	0.000447404
NP8	E1	YLR130C	0.000525204
NP8	E2	YLR133W	0.000339383
NP8	E3	YLR136C	0.00054275
NP8	E4	YLR137W	0.000326084
NP8	E5	DES7	0.00240412
NP8	E6	YLR142W	0.000473355
NP8	E7	YLR150W	0.000214051
NP8	E8	YLR151C	0.000518107
NP8	E9	YLR152C	0.00033747
NP8	E10	YLR154C	0.000287506
NP8	E11	YLR164W	0.000365637
NP8	E12	YLR165C	0.000673286
NP8	F1	YLR168C	0.000309665
NP8	F2	YLR170C	0.000288747
NP8	F3	YLR172C	0.00045493
NP8	F4	YLR173W	0.000315965
NP8	F5	YLR177W	0.000282843
NP8	F6	YLR179C	0.000276868
NP8	F7	YLR180W	0.000252391
NP8	F8	YLR181C	0.000288309
NP8	F9	YLR183C	0.000202419
NP8	F10	YLR185W	0.000200155
NP8	F11	YLR188W	0.000283494
NP8	F12	YLR190W	0.000318739
NP8	G1	YLR191W	0.000474573
NP8	G2	YLR193C	0.000275706
NP8	G3	YLR199C	0.000349717
NP8	G4	YLR200W	0.000311734
NP8	G5	YLR201C	0.000307603
NP8	G6	YLR203C	0.000340727
NP8	G7	YLR204W
NP8	G8	YLR205C	0.000278823
NP8	G9	YLR206W	0.000250824
NP8	G10	YLR209C	0.000251233
NP8	G11	YLR211C
NP8	G12	YLR213C	0.000311764
NP8	H1	YLR214W	0.000258375
NP8	H2	YLR216C	0.000410695
NP8	H3	YLR218C	0.000370415
NP8	H4	YLR220W	0.000400853
NP8	H5	YLR221C	0.000261391
NP8	H6	YLR224W	0.00039448
NP8	H7	YLR225C	0.000396097
NP8	H8	YLR226W	0.000455941
NP8	H9
NP8	H10	YLR231C
NP8	H11	YLR234W	0.000598889
NP8	H12	YLR238W
NP9	A1	p5472	0.000327848
NP9	A2	YLR241W	0.000296999
NP9	A3	YLR242C	0.000530668
NP9	A4	YLR244C	0.000240944
NP9	A5	YLR247C	0.000328767
NP9	A6	YLR248W	0.000691735
NP9	A7	YLR250W	0.000372876
NP9	A8	YLR253W	0.000596471
NP9	A9	YLR254C	0.000341431
NP9	A10	YLR257W	0.000398642
NP9	A11	YLR258W	0.00256391
NP9	A12	YLR260W	0.000315894
NP9	B1	YLR262C	0.000275777
NP9	B2	YLR264W	0.000330087
NP9	B3	YLR265C	0.000414933
NP9	B4	GFP+
NP9	B5	YLR267W	0.000527804
NP9	B6	BY4741	0
NP9	B7	YLR273C	0.000494467
NP9	B8	DES7	0.00230821
NP9	B9	YLR281C	0.000343677
NP9	B10	YLR283W
NP9	B11	YLR284C
NP9	B12	YLR285W
NP9	C1	YLR287C	0.000220274
NP9	C2	YLR287C-A	0.000511964
NP9	C3	YLR288C	0.00030153
NP9	C4	YLR289W	0.000258098
NP9	C5	YLR290C	0.000384292
NP9	C6	YLR292C	0.000243386
NP9	C7	YLR293C	0.00038599
NP9	C8	YLR297W	0.000263019
NP9	C9	YLR299W	0.000341241
NP9	C10	YLR300W	0.000237
NP9	C11	YLR304C	0.000344987
NP9	C12	YLR308W	0.000199227
NP9	D1	YLR312C	0.000259736
NP9	D2	YLR312W-A	0.00026087
NP9	D3	YLR313C	0.000607436
NP9	D4	YLR315W	0.00021614
NP9	D5	YLR320W	0.000277195
NP9	D6	YHL047C	0.00027969
NP9	D7	YHL046C
NP9	D8	YHL044W	0.000371881
NP9	D9	YHL043W	0.000254905
NP9	D10	YHL042W	0.000313423
NP9	D11	YHL040C	0.0006472
NP9	D12	YHL038C	0.000212315
NP9	E1	YHL036W	0.000263861
NP9	E2
NP9	E3	YHL034C	0.000252108
NP9	E4	YHL033C	0.000295315
NP9	E5	YHL032C	0.000311798
NP9	E6	YHL031C
NP9	E7	YHL030W	0.000351707
NP9	E8	YHL029C	0.000239866
NP9	E9	YHL028W	0.000330353
NP9	E10
NP9	E11
NP9	E12
NP9	F1	YHL022C
NP9	F2	YHL021C	0.000329253
NP9	F3	YHL020C	0.000460492
NP9	F4	YHL019C
NP9	F5	YHL017W	0.000289775
NP9	F6	YHL014C
NP9	F7	YHL013C	0.00025961
NP9	F8	YHL012W	0.000283533
NP9	F9	YHL010C	0.000327766
NP9	F10	YHL009C	0.000181073
NP9	F11	YHL008C	0.00107546
NP9	F12	YHL007C
NP9	G1	YHL006C	0.000258311
NP9	G2	YHL003C
NP9	G3	YHR001W-A	0.00088319
NP9	G4	YHR010W	0.000289649
NP9	G5	YHR011W	0.000297664
NP9	G6	YHR012W	0.000560233
NP9	G7	YHR013C	0.000282222
NP9	G8	YHR014W	0.000261169
NP9	G9	YHR015W	0.000259537
NP9	G10	YHR018C	0.00263592
NP9	G11	YHR021C
NP9	G12	YHR022C	0.000327564
NP9	H1	YHR028C	0.000519961
NP9	H2	YHR029C	0.000296775
NP9	H3	YHR030C	0.000193805
NP9	H4	YHR031C	0.000315942
NP9	H5	YHR033W
NP9	H6	YHR034C	0.000263221
NP9	H7	YHR035W	0.00021609
NP9	H8	YHR037W
NP9	H9	YHR038W
NP9	H10	YHR039C
NP9	H11	YHR044C	0.000223052
NP9	H12
NP10	A1	YOR001W	0.000672414
NP10	A2	YOR002W	0.000275975
NP10	A3	YOR003W	0.000390875
NP10	A4	YOR005C	0.00031472
NP10	A5	YOR006C	0.000409786
NP10	A6	YOR007C	0.000324406
NP10	A7
NP10	A8	YOR009W	0.000429032
NP10	A9	YOR010C	0.000409528
NP10	A10	YOR011W	0.000316814
NP10	A11	YOR012W	0.000323823
NP10	A12	YOR014W	0.000368708
NP10	B1	YOR016C	0.00036213
NP10	B2	YOR022C	0.000393731
NP10	B3	YOR023C	0.000348966
NP10	B4	YOR025W	0.000341141
NP10	B5	YOR026W	0.000315929
NP10	B6	YOR027W	0.00118325
NP10	B7	YOR028C	0.000375439
NP10	B8	YOR030W	0.000653925
NP10	B9	YOR031W	0.000526448
NP10	B10	YOR033C	0.000362697
NP10	B11	YOR034C	0.000501486
NP10	B12	YOR035C	0.000558008
NP10	C1	YOR036W	0.000335635
NP10	C2	YOR037W	0.000373642
NP10	C3	p5472	0.000478098
NP10	C4	YOR039W	0.000424019
NP10	C5	YOR040W	0.000465681
NP10	C6	YOR042W	0.000590711
NP10	C7	YOR043W	0.000459016
NP10	C8	YOR044W	0.000624664
NP10	C9	YOR045W	0.00033515
NP10	C10	YOR047C	0.000394897
NP10	C11	YOR049C	0.000487147
NP10	C12	YOR051C	0.000485157
NP10	D1	YOR052C	0.000234561
NP10	D2	YOR054C	0.00064454
NP10	D3	YOR058C	0.000355751
NP10	D4	YOR059C	0.00041933
NP10	D5	GFP+
NP10	D6	YOR062C	0.000300104
NP10	D7	YOR064C	0.000465831
NP10	D8	YOR065W	0.000762401
NP10	D9	YOR066W	0.000329579
NP10	D10	BY4741	0
NP10	D11	YOR068C	0.000477999
NP10	D12	YOR069W	0.000678569
NP10	E1	YOR070C	0.000350305
NP10	E2	YOR071C	0.000353009
NP10	E3	YOR073W	0.00025034
NP10	E4	YOR078W	0.000618009
NP10	E5	YOR079C	0.000443185
NP10	E6	YOR080W	0.000373126
NP10	E7	YOR081C	0.000241965
NP10	E8	DES7	0.00198107
NP10	E9	YOR084W	0.000534684
NP10	E10	YOR085W	0.000231943
NP10	E11	YOR086C	0.000401512
NP10	E12	YOR087W	0.000291092
NP10	F1	YOR089C	0.000310076
NP10	F2	YOR090C	0.000288127
NP10	F3	YOR092W	0.000308508
NP10	F4	YOR093C	0.00046615
NP10	F5	YOR094W	0.000273291
NP10	F6	YOR097C	0.000288419
NP10	F7	YOR099W	0.000960771
NP10	F8	YOR100C	0.0003764
NP10	F9	YOR101W	0.000578034
NP10	F10	YOR104W	0.000351141
NP10	F11	YOR106W	0.000244169
NP10	F12	YOR107W	0.000320843
NP10	G1	YOR108W	0.000433481
NP10	G2
NP10	G3	YOR111W	0.000538491
NP10	G4	YOR113W	0.00136092
NP10	G5	YOR115C	0.000320156
NP10	G6	YOR118W	0.000265306
NP10	G7	YOR125C	0.000526414
NP10	G8	YOR126C	0.000257235
NP10	G9	YOR128C	0.000509063
NP10	G10	YOR129C	0.000319534
NP10	G11	YOR130C	0.000484731
NP10	G12	YOR131C	0.000613254
NP10	H1	YOR132W	0.00101266
NP10	H2	YOR133W	0.000330733
NP10	H3	YOR134W	0.000278848
NP10	H4	YOR136W	0.000400885
NP10	H5	YOR137C	0.000473759
NP10	H6	YOR138C	0.000206927
NP10	H7	YOR140W	0.000265735
NP10	H8	YOR142W	0.000314554
NP10	H9	YOR144C	0.000853973
NP10	H10	YOR147W	0.000339702
NP10	H11	YOR150W	0.000602239
NP10	H12	YOR152C	0.000584542
NP11	A1
NP11	A2	YOR155C	0.000316123
NP11	A3	YOR156C	0.000308418
NP11	A4	YOR158W	0.000340711
NP11	A5	YOR161C	0.000323716
NP11	A6	YOR163W	0.000339301
NP11	A7	YOR164C	0.000372076
NP11	A8	YOR165W	0.000296532
NP11	A9	YOR166C	0.00042434
NP11	A10	YOR167C	0.00031777
NP11	A11	YOR171C	0.000391621
NP11	A12	YOR172W
NP11	B1	YOR173W	0.000344375
NP11	B2	p5472	0.000400869
NP11	B3	YOR177C	0.000373383
NP11	B4	YOR178C	0.000217343
NP11	B5	YOR179C	0.000614797
NP11	B6	YOR180C	0.000389506
NP11	B7	YOR182C	0.000396807
NP11	B8	YOR183W	0.000400583
NP11	B9	YOR184W	0.000298326
NP11	B10	YOR185C	0.00039914
NP11	B11	YOR188W	0.000290793
NP11	B12	YOR189W	0.000305214
NP11	C1	YOR190W	0.000352682
NP11	C2	GFP+
NP11	C3	YOR192C	0.000877995
NP11	C4	YOR289W	0.000482941
NP11	C5	BY4741	0
NP11	C6	DES7	0.00278937
NP11	C7	YOR295W	0.00045638
NP11	C8	YOR296W	0.000363892
NP11	C9	YOR297C	0.000439255
NP11	C10	YOR298W	0.000471902
NP11	C11	YOR299W	0.000331855
NP11	C12	YOR301W	0.000289033
NP11	D1	YOR304C-A	0.000256123
NP11	D2	YOR304W	0.000358668
NP11	D3	YOR307C	0.000446215
NP11	D4	YOR308C	0.000658448
NP11	D5	YOR311C	0.000361296
NP11	D6	YOR313C	0.000453375
NP11	D7	YOR315W	0.000396812
NP11	D8	YOR316C	0.000471888
NP11	D9	YOR322C	0.000532321
NP11	D10	YOR323C	0.000302504
NP11	D11	YOR324C	0.00035231
NP11	D12
NP11	E1	YOR332W	0.000302317
NP11	E2	YOR334W	0.000440615
NP11	E3	YOR337W	0.00024456
NP11	E4	YOR338W	0.000529078
NP11	E5	YOR339C	0.000374765
NP11	E6
NP11	E7	YOR344C	0.000287241
NP11	E8	YOR346W	0.00037202
NP11	E9	YOR347C	0.000280586
NP11	E10	YOR348C	0.0003462
NP11	E11	YOR349W	0.0005647
NP11	E12	YOR350C	0.000342433
NP11	F1	YOR369C	0.000281412
NP11	F2	YOR371C	0.000320527
NP11	F3	YOR374W	0.000304806
NP11	F4	YOR351C	0.000546632
NP11	F5	YOR354C	0.000239798
NP11	F6	YOR355W	0.000517825
NP11	F7	YOR356W	0.000438999
NP11	F8	YOR357C	0.000511233
NP11	F9	YOR358W	0.000756967
NP11	F10	YOR359W	0.000259474
NP11	F11	YOR360C	0.000530014
NP11	F12	YOR363C	0.000266688
NP11	G1	YOR375C	0.000330912
NP11	G2	YOR377W	0.000301133
NP11	G3	YOR378W	0.000376745
NP11	G4	YOR380W	0.000368047
NP11	G5	YOR381W	0.000244451
NP11	G6	YOR382W	0.00035901
NP11	G7	YHR046C	0.000734268
NP11	G8	YHR047C	0.000611482
NP11	G9	YHR048W	0.00051372
NP11	G10	YHR049W	0.000274457
NP11	G11	YHR050W	0.000313817
NP11	G12	YHR051W	0.000357494
NP11	H1	YHR057C	0.000265386
NP11	H2	YHR060W	0.000443266
NP11	H3	YHR061C	0.000440815
NP11	H4	YHR066W	0.000384666
NP11	H5	YHR075C	0.000391941
NP11	H6	YHR076W	0.000466641
NP11	H7	YHR077C	0.000424887
NP11	H8	YHR080C
NP11	H9	YHR081W	0.000431067
NP11	H10	YHR082C	0.000472928
NP11	H11	YHR084W	0.000271747
NP11	H12	YHR086W
NP12	A1	YHR087W	0.000485403
NP12	A2	YHR092C	0.000384171
NP12	A3	YHR094C	0.000548611
NP12	A4	YHR096C	0.000333627
NP12	A5	YHR100C	0.000816881
NP12	A6	YHR103W	0.000686255
NP12	A7	YHR104W	0.000431548
NP12	A8	YHR105W	0.000303518
NP12	A9	YHR108W	0.000496822
NP12	A10	YHR109W	0.000677817
NP12	A11	YHR110W	0.000424033
NP12	A12	YHR111W	0.000523696
NP12	B1	YHR112C	0.000360854
NP12	B2	YHR113W	0.000451984
NP12	B3	YHR114W	0.000566325
NP12	B4	YHR115C	0.000653125
NP12	B5	YHR116W	0.000493185
NP12	B6	YHR117W	0.000597252
NP12	B7	YHR120W	0.00075992
NP12	B8	YHR121W	0.000620143
NP12	B9	YHR123W	0.000598732
NP12	B10	YHR124W	0.000765629
NP12	B11	YHR126C	0.000414213
NP12	B12	YHR129C	0.000540898
NP12	C1	YHR132C	0.000379045
NP12	C2	YHR133C	0.000458189
NP12	C3	YHR134W	0.000605355
NP12	C4	YHR135C	0.000436779
NP12	C5	YHR136C	0.000903966
NP12	C6	YHR137W	0.000731255
NP12	C7	YHR138C	0.000458441
NP12	C8	YHR139C	0.000564679
NP12	C9	YMR140W	0.000606094
NP12	C10	YMR143W	0.000560031
NP12	C11	YMR144W	0.000696657
NP12	C12	YMR145C	0.00048146
NP12	D1	YMR147W	0.000394452
NP12	D2	YMR148W	0.000501422
NP12	D3	YMR152W	0.00065952
NP12	D4	YMR153W	0.00068491
NP12	D5	YMR155W	0.000592911
NP12	D6	YMR156C	0.000710093
NP12	D7	YMR157C	0.000528449
NP12	D8	YMR161W	0.000441382
NP12	D9	p5472	0.000616006
NP12	D10	YMR165C	0.000438663
NP12	D11	YMR170C	0.000462357
NP12	D12	YMR177W	0.000552484
NP12	E1	YMR178W	0.000381231
NP12	E2	YMR179W	0.000455252
NP12	E3	YMR180C	0.000385867
NP12	E4	YMR182C	0.000613774
NP12	E5	YMR183C	0.000469774
NP12	E6	YMR184W	0.000425616
NP12	E7	YMR186W	0.000609887
NP12	E8	YMR187C	0.000387467
NP12	E9	YMR188C	0.000456824
NP12	E10	YMR189W	0.000427915
NP12	E11	YMR193W	0.000491587
NP12	E12	YMR194W	0.000407778
NP12	F1	YMR195W	0.000401692
NP12	F2	BY4741	0
NP12	F3	YMR199W	0.000434031
NP12	F4	YMR201C	0.000456335
NP12	F5	YMR202W	0.000485108
NP12	F6	YMR204C	0.000421739
NP12	F7	YMR205C	0.000581107
NP12	F8	YMR210W	0.000396399
NP12	F9	YMR214W	0.000540962
NP12	F10	YMR217W	0.000415388
NP12	F11	YMR223W	0.000406085
NP12	F12	YMR224C	0.000442311
NP12	G1	YMR228W	0.00049499
NP12	G2	YMR230W	0.000440382
NP12	G3	YOR384W	0.000457984
NP12	G4	YOR385W	0.000406431
NP12	G5	YOL001W	0.000583257
NP12	G6	YOL003C	0.000726816
NP12	G7	YOL006C	0.000540893
NP12	G8	YOL008W	0.000586679
NP12	G9	YOL009C	0.000472203
NP12	G10	YOL011W	0.000491173
NP12	G11	YOL012C	0.000588899
NP12	G12	YOL013C	0.000343885
NP12	H1	DES7	0.00231886
NP12	H2	YOL018C	0.000435122
NP12	H3	YOL019W	0.000476297
NP12	H4	YOL020W	0.000525851
NP12	H5	YOL023W	0.000581873
NP12	H6	YOL024W	0.000500207
NP12	H7	YOL025W	0.000476492
NP12	H8	YOL027C	0.000592417
NP12	H9	GFP+
NP12	H10	YOL029C	0.00040592
NP12	H11	YOL030W	0.000420325
NP12	H12	YOL031C	0.000393577
NP13	A1	YOL032W	0.00088473
NP13	A2	YOL033W	0.000373043
NP13	A3	YOL036W	0.000622816
NP13	A4	YOL039W	0.000445985
NP13	A5	YOL041C	0.000374745
NP13	A6	YOL042W	0.000434033
NP13	A7	YOL043C	0.000521189
NP13	A8	YOL044W	0.00111407
NP13	A9	YOL047C	0.00134283
NP13	A10	YOL048C	0.000925928
NP13	A11	YOL049W	0.000363866
NP13	A12	YOL051W	0.000621087
NP13	B1	YOL052C	0.000484485
NP13	B2	YOL053W	0.000541064
NP13	B3	YOL054W	0.000390936
NP13	B4	YOL055C	0.000549246
NP13	B5	YOL056W	0.000538089
NP13	B6	YOL057W	0.000311825
NP13	B7	YOL058W	0.000429791
NP13	B8	YOL059W	0.000379413
NP13	B9	YOL062C	0.000392218
NP13	B10	YOL063C	0.000435655
NP13	B11	p5472	0.000719931
NP13	B12	YOL065C	0.00042791
NP13	C1	BY4741	0
NP13	C2	YOL070C	0.000710194
NP13	C3	YOL071W	0.000538777
NP13	C4	YOL072W	0.000402904
NP13	C5	YOL076W	0.000789676
NP13	C6	YOL080C	0.000741544
NP13	C7	GFP+
NP13	C8	YOL082W	0.000408268
NP13	C9	YPL274W	0.000395291
NP13	C10	YPL273W	0.000364815
NP13	C11	YPL272C	0.000720551
NP13	C12	YPL270W	0.000314445
NP13	D1	YPL269W	0.000780143
NP13	D2	YPL267W	0.000481099
NP13	D3	YPL265W	0.000371608
NP13	D4	YPL264C	0.000694851
NP13	D5	YPL263C	0.000475228
NP13	D6	YPL262W	0.000483235
NP13	D7	YPL260W	0.000436642
NP13	D8	YPL259C	0.000400219
NP13	D9	YPL258C	0.000507447
NP13	D10	YPL257W	0.000450243
NP13	D11	YPL256C	0.000419802
NP13	D12	YPL254W	0.00182947
NP13	E1	YPL253C	0.000707789
NP13	E2	YPL250C	0.000511295
NP13	E3	YPL249C	0.000514231
NP13	E4	YPL248C	0.00284876
NP13	E5	YPL247C	0.000959169
NP13	E6	YPL246C	0.000401984
NP13	E7	YPL245W	0.000794068
NP13	E8	YPL241C	0.00112961
NP13	E9	YPL240C	0.000438225
NP13	E10	YPL239W	0.000585362
NP13	E11	YPL236C	0.000612622
NP13	E12	YPL230W	0.000372525
NP13	F1	YPL229W	0.00056999
NP13	F2	YPL227C	0.000378187
NP13	F3	YPL225W	0.00063134
NP13	F4	YPL223C	0.000634768
NP13	F5	YPL222W	0.000391413
NP13	F6	YPL221W	0.000542766
NP13	F7	YPL220W	0.000466368
NP13	F8	YPL219W	0.000385754
NP13	F9	YPL215W	0.000739015
NP13	F10	YPL214C	0.000853111
NP13	F11	YPL213W	0.000431088
NP13	F12	YPL212C	0.000842417
NP13	G1	YPL207W	0.000463837
NP13	G2	YPL206C	0.000401941
NP13	G3	YPL203W	0.000397255
NP13	G4	YPL202C	0.000305555
NP13	G5	YPL201C	0.000505579
NP13	G6	YPL200W	0.000495127
NP13	G7	YPL199C	0.00212847
NP13	G8	YPL198W	0.000762571
NP13	G9	YPL196W	0.00127643
NP13	G10	YPL193W	0.00191434
NP13	G11	YPL192C	0.000825908
NP13	G12	DES7	0.000605586
NP13	H1	YOL015W	0.000587834
NP13	H2	YGR256W	0.000621482
NP13	H3	YGR260W	0.000543212
NP13	H4	YGR261C	0.00117812
NP13	H5	YGR262C	0.000468954
NP13	H6	YGR263C	0.000339693
NP13	H7	YGR266W	0.000440709
NP13	H8	YGR268C	0.000608174
NP13	H9	YGR270W	0.000420514
NP13	H10	YGR279C	0.000361
NP13	H11	YGR281W	0.000337934
NP13	H12	YGR282C
NP14	A1	p5472	0.000616612
NP14	A2	YGR284C	0.000244375
NP14	A3	YGR285C	0.00100259
NP14	A4	YGR286C	0.000522974
NP14	A5	YGR287C	0.0005391
NP14	A6	YGR288W	0.00100392
NP14	A7	YIL009C-A	0.000754223
NP14	A8	YIR017C	0.000769898
NP14	A9
NP14	A10	YIR021W	0.000640733
NP14	A11	YIR024C	0.000550412
NP14	A12	YIR026C	0.000573863
NP14	B1	YIR027C	0.00323899
NP14	B2	YIR029W	0.000229782
NP14	B3	YIR031C	0.0029167
NP14	B4	YIR033W	0.000326414
NP14	B5	YIR034C	0.000953833
NP14	B6	YIR035C	0.00027309
NP14	B7	YIR037W	0.000323505
NP14	B8	YIR038C	0.000950152
NP14	B9	YIR039C	0.000737982
NP14	B10	YIR042C	0.00094019
NP14	B11	YKL033W-A	0.000803911
NP14	B12	YKR035W-A	0.000448695
NP14	C1	YKR066C	0.000314958
NP14	C2	YKR067W	0.00279006
NP14	C3	YKR069W	0.000298862
NP14	C4	YKR070W	0.000278757
NP14	C5	YKR072C
NP14	C6	YKR074W	0.000366782
NP14	C7	YKR075C	0.000308889
NP14	C8	YKR076W	0.000373538
NP14	C9	YKR078W	0.000537924
NP14	C10	YKR080W	0.00122157
NP14	C11	YKR084C	0.000285393
NP14	C12	YKR087C	0.00052922
NP14	D1	YKR088C	0.000191027
NP14	D2	YKR089C	0.000380706
NP14	D3	YKR090W	0.00193691
NP14	D4	YKR091W	0.000293023
NP14	D5	YKR092C	0.000750506
NP14	D6	YKR097W	0.00196421
NP14	D7	YKR100C
NP14	D8	YKR103W	0.00194241
NP14	D9	YKR104W	0.000378769
NP14	D10	YLR262C-A	0.000320887
NP14	D11	YLR422W	0.00026202
NP14	D12	YLR426W	0.00083329
NP14	E1	YLR427W	0.000680229
NP14	E2	YLR435W	0.000231941
NP14	E3	YLR436C	0.00122419
NP14	E4	YLR437C	0.000363061
NP14	E5	YLR438W	0.000288819
NP14	E6	YLR441C
NP14	E7	YLR443W	0.000550817
NP14	E8	YLR445W	0.000340287
NP14	E9	YLR447C	0.000402184
NP14	E10	YLR449W	0.0026018
NP14	E11	YLR452C	0.00171283
NP14	E12	YLR453C	0.000512454
NP14	F1	BY4741	0
NP14	F2	YLR456W	0.000392539
NP14	F3	YLR460C	0.00133189
NP14	F4	YLR461W	0.000575366
NP14	F5	YML021C	0.00249224
NP14	F6	YML081C-A	0.000299345
NP14	F7	YMR060C	0.000643532
NP14	F8	GFP+
NP14	F9	YMR174C	0.00037803
NP14	F10	YMR175W	0.000335809
NP14	F11	YNR032C-A
NP14	F12	YNR051C	0.000271404
NP14	G1	DES7	0.002831
NP14	G2	YNR057C	0.000653518
NP14	G3	YNR058W	0.000814758
NP14	G4	YNR059W	0.00080916
NP14	G5	YNR060W	0.00030682
NP14	G6	YNR061C	0.000336439
NP14	G7	YNR062C	0.000748745
NP14	G8	YNR063W	0.00228384
NP14	G9	YNR064C	0.000340594
NP14	G10	YNR065C	0.00027652
NP14	G11	YNR066C	0.000272593
NP14	G12	YNR067C	0.000291635
NP14	H1	YNR068C
NP14	H2	YPL187W	0.000242974
NP14	H3	YPL186C	0.00117471
NP14	H4	YPL184C
NP14	H5	YPL179W	0.00030227
NP14	H6	YPL177C	0.000414171
NP14	H7	YPL176C	0.000312982
NP14	H8	YPL172C	0.000385315
NP14	H9	YPL171C	0.000364976
NP14	H10	YPL170W	0.000244443
NP14	H11	YPL168W	0.000303215
NP14	H12
NP15	A1	YPL174C	0.0058959
NP15	A2	YPL173W	0.00127689
NP15	A3	YPL166W	0.000791618
NP15	A4	YPL165C	0.000916198
NP15	A5	YPL164C	0.000510445
NP15	A6	YPL163C	0.000331442
NP15	A7	p5472	0.000934198
NP15	A8	BY4741	0
NP15	A9	YPL159C	0.00100633
NP15	A10	YPL157W	0.000422379
NP15	A11	YPL156C	0.000398277
NP15	A12	YPL155C	0.000318589
NP15	B1	YPL154C	0.00136267
NP15	B2	YPL152W	0.000853431
NP15	B3	YPL150W	0.000636066
NP15	B4	YPL147W	0.000365232
NP15	B5	YPL145C	0.00389992
NP15	B6	YPL144W	0.000638546
NP15	B7	YPL141C	0.00039108
NP15	B8	YPL140C	0.00109941
NP15	B9	YPL139C	0.000608567
NP15	B10	YPL138C	0.000587789
NP15	B11	YPL135W	0.000691371
NP15	B12	YPL133C	0.000803333
NP15	C1	YPL130W	0.000783451
NP15	C2	YPL129W	0.000764154
NP15	C3	YPL127C	0.000405586
NP15	C4	YPL125W	0.000423387
NP15	C5	YPL123C	0.000253795
NP15	C6	YPL121C	0.00234614
NP15	C7	YPL120W	0.000959929
NP15	C8	YPL119C	0.000350846
NP15	C9	YPL118W	0.000709039
NP15	C10	YPL116W	0.000728595
NP15	C11	GFP+
NP15	C12	YPL113C	0.00103606
NP15	D1	YPL112C	0.00132627
NP15	D2	YPL111W	0.000303401
NP15	D3	YPL110C	0.00154532
NP15	D4	YPL109C	0.000334527
NP15	D5	YPL108W	0.000681595
NP15	D6	YPL107W	0.00109684
NP15	D7	YPL106C	0.00070196
NP15	D8	YPL103C	0.00119691
NP15	D9	YPL100W	0.000544918
NP15	D10	YPL099C	0.00090341
NP15	D11	DES7	0.00311399
NP15	D12	YPL097W	0.000917232
NP15	E1	YPL096W
NP15	E2	YPL095C
NP15	E3	YPL092W	0.00194988
NP15	E4	YPL090C	0.000739208
NP15	E5	YPL089C	0.000916749
NP15	E6	YPL088W	0.000333666
NP15	E7	YPL086C	0.000286903
NP15	E8	YPL081W	0.00049458
NP15	E9	YPL079W	0.00482694
NP15	E10	YPL077C	0.000611435
NP15	E11	YPL074W	0.000961461
NP15	E12	YPL072W	0.000507527
NP15	F1	YPL071C	0.000327933
NP15	F2	YPL070W	0.000919474
NP15	F3	YPL069C	0.000252955
NP15	F4	YPL066W	0.00227075
NP15	F5	YPL064C	0.000456199
NP15	F6	YPL059W	0.000329842
NP15	F7
NP15	F8	YPL057C	0.000918268
NP15	F9	YPL056C	0.000603491
NP15	F10	YPL055C	0.00050962
NP15	F11	YPL054W	0.000735768
NP15	F12	YPL053C	0.000537734
NP15	G1	YPL052W	0.000268706
NP15	G2	YPL051W	0.000685944
NP15	G3	YPL050C	0.00205103
NP15	G4	YPL049C	0.000463517
NP15	G5	YPL048W	0.00062273
NP15	G6	YPL047W	0.000712861
NP15	G7	YPL046C	0.000838075
NP15	G8	YPL045W	0.000276552
NP15	G9	YPL042C	0.000757048
NP15	G10	YPL041C	0.00065445
NP15	G11
NP15	G12
NP15	H1	YPL038W	0.00189567
NP15	H2
NP15	H3	YPL033C	0.000978553
NP15	H4	YPL032C	0.000483092
NP15	H5	YPL030W	0.000767034
NP15	H6	YPL029W	0.000648902
NP15	H7	YPL026C	0.00107784
NP15	H8	YPL023C	0.000488335
NP15	H9	YPL021W	0.00100441
NP15	H10	YPL019C
NP15	H11	YPL018W	0.000783389
NP15	H12	YPL015C	0.000563087
NP16	A1	YPL014W	0.000719589
NP16	A2	YPL013C	0.000534116
NP16	A3	YPL009C	0.000458736
NP16	A4	YPL006W	0.000452501
NP16	A5	YPL005W	0.00130916
NP16	A6	YPL003W	0.00144866
NP16	A7	YPL002C	0.00094503
NP16	A8	YPL001W
NP16	A9	YPR001W	0.000932902
NP16	A10	YPR002W	0.000618453
NP16	A11	YPR003C	0.00901171
NP16	A12	BY4741	0
NP16	B1	YPR005C	0.000841502
NP16	B2	YPR106W	0.000704478
NP16	B3	p5472	0.000594594
NP16	B4	YPR116W	0.000289557
NP16	B5	GFP+
NP16	B6	YPR119W	0.00049354
NP16	B7	YPR122W	0.00263245
NP16	B8	YPR124W	0.000439615
NP16	B9	YPR125W
NP16	B10	YPR127W	0.00270248
NP16	B11	YPR128C	0.000852375
NP16	B12	YPR129W	0.000363136
NP16	C1	YPR131C	0.000428495
NP16	C2	YPR132W	0.00213132
NP16	C3	YPR135W	0.00239076
NP16	C4	YPR138C	0.00480584
NP16	C5	YPR139C	0.0030423
NP16	C6	YPR140W	0.000694751
NP16	C7	YPR141C	0.000406212
NP16	C8	YPR145W	0.00019646
NP16	C9	YPR147C	0.000489466
NP16	C10	YPR148C	0.00134671
NP16	C11	YPR149W	0.00148087
NP16	C12	YPR152C	0.000448608
NP16	D1	YPR153W	0.000845121
NP16	D2	YPR154W	0.000321999
NP16	D3	YPR155C	0.000455763
NP16	D4	YPR156C	0.000635196
NP16	D5	YPR158W	0.000483995
NP16	D6	YPR159W	0.000337648
NP16	D7	YPR160W	0.000793039
NP16	D8	YPR163C	0.000419497
NP16	D9	DES7	0.0030375
NP16	D10	YPR166C	0.00172366
NP16	D11	YPR167C	0.000581025
NP16	D12	YPR171W	0.00125654
NP16	E1
NP16	E2	YPR174C	0.000191034
NP16	E3
NP16	E4	YPR185W	0.000909828
NP16	E5	YPR188C	0.000653911
NP16	E6
NP16	E7	YPR191W	0.000296737
NP16	E8	YPR192W	0.000328438
NP16	E9
NP16	E10	YPR196W	0.00103028
NP16	E11	YPR199C	0.000379624
NP16	E12	YPR200C	0.00043627
NP16	F1	YPR201W	0.000181669
NP16	F2	YJL006C	0.000622169
NP16	F3	YJL020C	0.000258887
NP16	F4	YJL023C	0.000358238
NP16	F5	YJL024C	0.000503286
NP16	F6	YJL027C	0.000288168
NP16	F7	YJR001W
NP16	F8	YJR004C	0.000364172
NP16	F9	YJR005W	0.000414456
NP16	F10	YJR009C	0.000431921
NP16	F11	YJR011C	0.000568467
NP16	F12	YJR014W	0.000443396
NP16	G1	YJR019C	0.000569278
NP16	G2	YJR024C	0.000739905
NP16	G3	YJR025C	0.00218333
NP16	G4	YJR032W	0.00110931
NP16	G5	YJR033C	0.000366878
NP16	G6	YJR034W	0.000769905
NP16	G7	YJR035W	0.000533191
NP16	G8	YJR036C	0.000921435
NP16	G9	YJR039W	0.000406435
NP16	G10	YJR043C	0.00310335
NP16	G11	YJR048W	0.000274489
NP16	G12	YJR049C	0.00157375
NP16	H1	YJR050W	0.00128147
NP16	H2	YJR051W	0.000583151
NP16	H3	YJR053W	0.000239113
NP16	H4	YJR054W	0.00293585
NP16	H5	YJR055W	0.00121591
NP16	H6	YJR056C	0.000443702
NP16	H7	YJR058C	0.000443803
NP16	H8	YJR060W	0.00129903
NP16	H9	YJR061W	0.00138683
NP16	H10
NP16	H11	YDL133C-A
NP16	H12	YDR058C	0.000383853
NP17	A1	YDR202C	0.000431024
NP17	A2	YDR205W	0.000829051
NP17	A3	YFR039C	0.000341251
NP17	A4	YGL219C	0.000552027
NP17	A5	YGR028W	0.00073096
NP17	A6	YGR032W	0.000295934
NP17	A7	YGR038W	0.000795267
NP17	A8	YGR040W	0.000597
NP17	A9	YGR053C	0.000878636
NP17	A10	YGR063C	0.00040128
NP17	A11	YGR089W	0.000642962
NP17	A12	p5472	0.000584728
NP17	B1	YGR106C	0.000539797
NP17	B2	YGR110W	0.000633107
NP17	B3	YGR238C	0.000491845
NP17	B4	YGR248W	0.000340933
NP17	B5	YGR250C	0.000685466
NP17	B6	YJL137C	0.000422944
NP17	B7	YJL139C	0.000417973
NP17	B8	YJL140W	0.000664308
NP17	B9	YJL141C	0.000212391
NP17	B10	YJL151C	0.000313657
NP17	B11	YJL160C	0.000869028
NP17	B12	BY4741	0
NP17	C1	YJL165C	0.000295751
NP17	C2	YJL177W	0.000495299
NP17	C3	YJL184W	0.000624367
NP17	C4	YJL189W	0.000396702
NP17	C5	YJL191W	0.000468391
NP17	C6	YJL200C	0.000919264
NP17	C7	YJL206C	0.000606449
NP17	C8	YJL213W	0.000627293
NP17	C9	YKL096W-A	0.000636664
NP17	C10	YKL194C	0.000482862
NP17	C11	YKL201C	0.0030381
NP17	C12	YKL204W	0.000823177
NP17	D1	YKL209C	0.00042234
NP17	D2	YKL215C	0.000434536
NP17	D3	YKL220C	0.000664369
NP17	D4	YKR019C	0.000622075
NP17	D5	YKR023W	0.000738464
NP17	D6	GFP+
NP17	D7	YKR028W	0.000314891
NP17	D8	YKR029C	0.000306509
NP17	D9	YKR039W	0.000712459
NP17	D10	DES7	0.00291899
NP17	D11	YML035C	0.000416197
NP17	D12	YFL014W	0.000394225
NP17	E1	YFL042C	0.000319045
NP17	E2	YFR025C	0.000579257
NP17	E3	YFR030W	0.000261709
NP17	E4	YHR146W	0.000294084
NP17	E5	YHR171W	0.000457287
NP17	E6	YJL070C	0.000384225
NP17	E7	YJL078C	0.000473957
NP17	E8	YJL094C	0.000367317
NP17	E9	YJL101C	0.000454762
NP17	E10	YJL128C	0.000501036
NP17	E11	YKR094C	0.000267527
NP17	E12	YKR096W
NP17	F1
NP17	F2	YLR110C	0.000449536
NP17	F3	YLR390W-A	0.000398102
NP17	F4	YLR439W	0.000409116
NP17	F5	YLR455W	0.000310319
NP17	F6	YML066C	0.00052991
NP17	F7	YML115C	0.000465115
NP17	F8	YMR037C	0.000675933
NP17	F9
NP17	F10	YMR104C	0.000471937
NP17	F11	YMR118C	0.000678656
NP17	F12	YMR119W	0.000449383
NP17	G1
NP17	G2	YNR055C	0.0003042
NP17	G3	YNR069C	0.000830853
NP17	G4	YOL125W	0.000469341
NP17	G5	YOL147C	0.000506421
NP17	G6	YPL268W	0.000302917
NP17	G7
NP17	G8	YPR008W	0.000221543
NP17	G9	YPR013C	0.000342845
NP17	G10	YPR023C	0.000434881
NP17	G11	YPR024W	0.000663116
NP17	G12	YPR026W
NP17	H1	YPR031W	0.000528252
NP17	H2	YPR037C	0.000624847
NP17	H3	YPR043W	0.000365967
NP17	H4	YPR067W	0.000490555
NP17	H5	YPR078C	0.000491756
NP17	H6	YAR002C-A	0.000798961
NP17	H7	YBR083W	0.000795401
NP17	H8	YBR084C-A	0.000560843
NP17	H9	YBR090C	0.000556349
NP17	H10	YBR125C	0.000317964
NP17	H11	YBR131W	0.00039174
NP17	H12	YBR168W
NP18	A1	YBR169C	0.000717583
NP18	A2	YBR270C	0.000481726
NP18	A3	YBR272C	0.000469223
NP18	A4	YBR276C	0.000410737
NP18	A5	YBR287W	0.000805691
NP18	A6	YBR288C	0.0005825
NP18	A7	YBR289W	0.000945118
NP18	A8	YBR294W	0.00104685
NP18	A9	YBR301W	0.00143169
NP18	A10	p5472	0.000636719
NP18	A11	BY4741	0
NP18	A12	GFP+
NP18	B1	YCR046C	0.000720155
NP18	B2	YCR047C	0.000322423
NP18	B3	YCR060W	0.000937103
NP18	B4	DES7	0.0030548
NP18	B5	YCR069W	0.000124414
NP18	B6	YCR083W	0.000630747
NP18	B7	YCR084C	0.00064753
NP18	B8	YCR088W	0.00222186
NP18	B9	YDR007W	0.000909915
NP18	B10	YFL026W	0.00133587
NP18	B11	YFR011C	0.000923152
NP18	B12	YFR013W	0.00112353
NP18	C1	YNL052W	0.000304814
NP18	C2	YNL056W	2.04429e-05
NP18	C3	YNL065W	0.00053903
NP18	C4	YNL066W	0.00070521
NP18	C5	YNL070W	0.0010423
NP18	C6	YNL072W	0.00122562
NP18	C7	YNL073W	0.00151797
NP18	C8	YNL074C	0.00209491
NP18	C9	YNL076W	0.000808746
NP18	C10	YNL078W	0.000883825
NP18	C11	YNL079C	0.00409496
NP18	C12	YNL080C
NP18	D1
NP18	D2	YNL085W	0.000269986
NP18	D3	YNL090W	0.000402684
NP18	D4	YNL093W	0.000564943
NP18	D5	YNL095C	0.000444538
NP18	D6	YNL097C	0.0008533
NP18	D7	YNL099C	0.000569418
NP18	D8	YNL104C	0.000659793
NP18	D9	YNL107W	0.000757
NP18	D10	YNL115C	0.000528739
NP18	D11	YNL119W
NP18	D12	YNL125C
NP18	E1	YNL130C	0.000164407
NP18	E2	YEL001C	0.000450408
NP18	E3	YEL003W	0.000558662
NP18	E4	YEL004W	0.000726458
NP18	E5
NP18	E6	YEL006W	0.000744304
NP18	E7	YEL009C	0.000455275
NP18	E8	YEL013W	0.000783987
NP18	E9	YEL015W	0.000664668
NP18	E10	YEL016C
NP18	E11	YEL017C-A
NP18	E12	YEL017W
NP18	F1	YEL018W	0.000332749
NP18	F2	YEL020C	0.000171614
NP18	F3
NP18	F4
NP18	F5	YEL027W	2.08473e-05
NP18	F6	YEL029C	0.000594055
NP18	F7	YEL031W	0.000698091
NP18	F8	YEL036C	0.000746033
NP18	F9	YEL037C	0.000777354
NP18	F10	YEL039C
NP18	F11	YEL040W
NP18	F12
NP18	G1
NP18	G2	YEL044W	0.000321972
NP18	G3
NP18	G4	YEL048C	0.000528729
NP18	G5	YEL049W	0.000493057
NP18	G6	YEL050C	0.000432797
NP18	G7	YEL051W	0.000892402
NP18	G8	YEL052W	0.000663154
NP18	G9	YEL053C	0.000406157
NP18	G10	YEL054C	0.000268006
NP18	G11	YEL056W
NP18	G12	YEL057C	0.000521756
NP18	H1	YEL060C	0
NP18	H2	YEL062W	0.00038621
NP18	H3	YEL063C	0.000542222
NP18	H4	YEL064C	0.000269352
NP18	H5	YEL065W	0.000288078
NP18	H6	YEL066W
NP18	H7
NP18	H8	YEL072W
NP18	H9	YER001W	0.000199834
NP18	H10	YER005W	0.000155891
NP18	H11	YER007C-A
NP18	H12	YER007W
NP19	A1	YER010C	0.00113565
NP19	A2	YER011W	0.00152478
NP19	A3	YGR027C	0.000403262
NP19	A4	YGR031W	0.00134054
NP19	A5	YGR033C	0.00117805
NP19	A6	YGR034W	0.00105469
NP19	A7	YGR035C	0.000508085
NP19	A8	YGR036C	0.00116684
NP19	A9	YGR037C	0.00115622
NP19	A10	p5472	0.000762737
NP19	A11	BY4741	0
NP19	A12	GFP+
NP19	B1	YGR045C	0.000585776
NP19	B2	YGR052W	0.00279939
NP19	B3	YGR054W	0.0011197
NP19	B4	YGR055W	0.000564861
NP19	B5	YGR056W	0.0011906
NP19	B6	YGR057C	0.000291738
NP19	B7	YGR058W	0.00105099
NP19	B8	YGR059W	0.000310535
NP19	B9	YGR066C	0.000491023
NP19	B10	YGR067C	0.000229867
NP19	B11	YGR068C	0.000660513
NP19	B12	DES7	0.00595664
NP19	C1	YGR071C	0.00172506
NP19	C2	YGR076C	0.000886108
NP19	C3	YGR077C	0.00352024
NP19	C4	YGR078C	0.00162649
NP19	C5	YGR080W	0.000786412
NP19	C6	YGR084C	0.00137008
NP19	C7	YGR087C	0.00417264
NP19	C8	YGR088W	0.000381694
NP19	C9	YGR097W	0.000881795
NP19	C10	YGR100W	0.000351861
NP19	C11	YGR101W	0.00179751
NP19	C12	YGR102C
NP19	D1	YGR104C	0.000656386
NP19	D2	YGR105W	0.00106342
NP19	D3	YGR108W	0.00168826
NP19	D4	YGR109C	0.000502654
NP19	D5	YGR112W	0.00184377
NP19	D6	YGR118W	0.00162951
NP19	D7	YGR121C	0.00100469
NP19	D8	YGR122W	0.000471109
NP19	D9	YJL127C	0.00141886
NP19	D10	YJL124C	0.000780771
NP19	D11	YJL123C	0.000929455
NP19	D12	YJL122W
NP19	E1	YJL121C	0.000370743
NP19	E2	YJL118W	0.000888735
NP19	E3	YJL117W	0.000331993
NP19	E4	YJL116C	0.000463433
NP19	E5	YJL112W	0.000950168
NP19	E6	YJL110C	0.000820204
NP19	E7	YJL108C	0.000863107
NP19	E8	YJL106W	0.000935088
NP19	E9	YJL100W	0.000952275
NP19	E10	YJL099W	0.00038088
NP19	E11	YJL098W
NP19	E12
NP19	F1	YJL092W	0.000473473
NP19	F2
NP19	F3	YJL088W	0.000777219
NP19	F4	YJL083W	0.00136238
NP19	F5	YJL082W	0.000769568
NP19	F6	YJL079C	0.00151535
NP19	F7	YJL077C	0.000880341
NP19	F8	YJL073W	0.00106654
NP19	F9	YJL071W
NP19	F10	YJL068C	0.000833067
NP19	F11	YJL066C	0.000613845
NP19	F12	YJL065C	0.000836083
NP19	G1	YJL063C	0.00089825
NP19	G2	YJL062W	0.00111423
NP19	G3	YJL060W	0.00160682
NP19	G4	YJL059W	0.000366758
NP19	G5	YJL058C	0.00078296
NP19	G6
NP19	G7	YJL056C	0.000655064
NP19	G8	YJL055W	0.000385696
NP19	G9	YJL053W	0.00101801
NP19	G10	YJL052W	0.000315835
NP19	G11	YJL051W	0.000456141
NP19	G12	YJL049W	0.0007432
NP19	H1	YJL048C	0.000896781
NP19	H2	YJL047C	0.000870922
NP19	H3	YJL046W
NP19	H4	YJL044C
NP19	H5	YJL043W	0.00100437
NP19	H6	YJL038C	0.000961013
NP19	H7	YJL037W	0.000533048
NP19	H8	YJL036W	0.00106428
NP19	H9	YER114C	0.000751864
NP19	H10	YER115C	0.000595508
NP19	H11	YER116C	0.000434675
NP19	H12
NP20	A1	YBL001C	0.00766655
NP20	A2	YBL003C	0.00084999
NP20	A3	YBL005W	0.00112455
NP20	A4	YBL006C	0.0013121
NP20	A5	YBL007C	0.00103177
NP20	A6	YBL008W	0.000483209
NP20	A7	YBL009W	0.000826165
NP20	A8	YBL010C	0.00137863
NP20	A9	YBL011W	0.000429341
NP20	A10	YBL013W	0.000849284
NP20	A11	YBL015W	0.000966976
NP20	A12	YBL016W	0.00100484
NP20	B1	YBL017C	0.00103476
NP20	B2	YBL019W	0.00121894
NP20	B3	YBL021C	0.00131168
NP20	B4	YBL024W	0.00172441
NP20	B5	YBL025W	0.00059868
NP20	B6	YBL027W	0.000633934
NP20	B7	YBL028C	0.000723098
NP20	B8	YBL029W	0.00142642
NP20	B9	YBL031W	0.000630281
NP20	B10	YBL032W	0.000816999
NP20	B11	YBL033C	0.00044708
NP20	B12	YBL036C	0.00114125
NP20	C1	YBL037W	0.00090299
NP20	C2	YBL038W	0.000536871
NP20	C3	YBL039C	0.00156964
NP20	C4	YBL042C	0.000925452
NP20	C5	YBL045C	0.00113336
NP20	C6	YBL046W	0.00129112
NP20	C7	YBL047C	0.000855185
NP20	C8	YBL049W	0.00141109
NP20	C9	YBL052C	0.0124172
NP20	C10	YBL054W	0.00149647
NP20	C11	YBL056W	0.00249965
NP20	C12	YBL057C	0.000895341
NP20	D1	YBL058W	0.00115474
NP20	D2	YBL059W	0.00150261
NP20	D3	YBL061C	0.000860804
NP20	D4	YBL063W	0.000534385
NP20	D5	YBL064C	0.00186771
NP20	D6	YBL066C	0.000710852
NP20	D7	p5472	0.00112504
NP20	D8	YBL068W	0.00147163
NP20	D9	YBL069W	0.00109249
NP20	D10	YBL072C	0.000866769
NP20	D11	YBL075C	0.000762958
NP20	D12	YBL078C	0.00120225
NP20	E1	YBL079W	0.00147379
NP20	E2	YBL080C	0.000643606
NP20	E3	YBL081W	0.00171964
NP20	E4	YBL085W	0.00124294
NP20	E5	YBL086C	0.000894245
NP20	E6	YBL087C	0.000722991
NP20	E7	YBL089W	0.00167117
NP20	E8	YBL090W	0.00100608
NP20	E9	YBL091C	0.00112516
NP20	E10	YBL093C	0.000747071
NP20	E11	YAL068C	0.00107175
NP20	E12	YAL067C	0.000879292
NP20	F1	BY4741	6.73739e-07
NP20	F2	YAL062W	0.0042661
NP20	F3	GFP+
NP20	F4	YAL060W	0.00114774
NP20	F5	YAL059W	0.000731517
NP20	F6	YAL058W	0.000977234
NP20	F7	YAL056W	0.000871259
NP20	F8	YAL055W	0.00089601
NP20	F9	YAL053W	0.00129627
NP20	F10	YAL051W	0.00108137
NP20	F11	YAL049C	0.00129519
NP20	F12	YAL048C	0.000903256
NP20	G1	YAL046C	0.000740479
NP20	G2	YAL044C	0.000920709
NP20	G3	YAL042W	0.000485345
NP20	G4	YAL040C	0.00196717
NP20	G5	YAL039C	0.000429657
NP20	G6	DES7	0.00333836
NP20	G7
NP20	G8
NP20	G9	YAL034C	0.00126434
NP20	G10	YAL031C	0.00153769
NP20	G11	YAL030W	0.00110382
NP20	G12	YAL029C	0.00124766
NP20	H1	YAL028W	0.0012829
NP20	H2	YAL027W	0.0008387
NP20	H3	YAL026C	0.00105248
NP20	H4	YAL023C	0.00120515
NP20	H5	YAL022C	0.000973087
NP20	H6	YAL021C	0.00127322
NP20	H7	YAL020C	0.000758209
NP20	H8	YAL019W	0.000972195
NP20	H9	YAL018C	0.000926435
NP20	H10	YAL017W	0.00106994
NP20	H11	YAL015C	0.000674183
NP20	H12
NP21	A1	YAL013W	0.00116356
NP21	A2	YAL011W	0.000262838
NP21	A3	YAL010C	0.00156566
NP21	A4	YAL009W	0.00115253
NP21	A5	YAL008W	0.000969946
NP21	A6	YAL007C	0.00187431
NP21	A7	YAL005C	0.000446717
NP21	A8	YAL002W	0.000834065
NP21	A9	YAR002W	0.00937999
NP21	A10	YAR003W	0.000911199
NP21	A11	p5472	0.000346346
NP21	A12	YAR015W	0.000610885
NP21	B1	YAR018C	0.00111131
NP21	B2	YAR020C	0.00114469
NP21	B3	YAR023C	0.000820039
NP21	B4	YAR027W	0.000762737
NP21	B5	YAR028W	0.00104904
NP21	B6	YAR029W	0.000922781
NP21	B7	YAR031W	0.00108069
NP21	B8	YAR035W	0.000970667
NP21	B9	YMR062C	0.000613864
NP21	B10	YMR063W	0.00185873
NP21	B11	YMR064W	0.000782417
NP21	B12	YMR065W	0.000840578
NP21	C1	BY4741	6.43387e-07
NP21	C2	YMR069W	0.00132148
NP21	C3	YMR070W	0.000894428
NP21	C4	YMR071C	0.000708612
NP21	C5	YMR072W	0.00186531
NP21	C6	YMR073C	0.00129463
NP21	C7	YMR075W	0.00124195
NP21	C8	YMR077C	0.000595214
NP21	C9	YMR078C	0.000685022
NP21	C10	YMR080C	0.000616622
NP21	C11	YMR081C	0.000879567
NP21	C12	YMR083W	0.000840896
NP21	D1	YMR084W	0.000586845
NP21	D2	YMR085W	0.000769427
NP21	D3	YMR086W	0.000910297
NP21	D4	YMR087W	0.000970608
NP21	D5	YMR089C	0.00091357
NP21	D6	YMR090W	0.00137829
NP21	D7	YMR091C	0.000703536
NP21	D8	YMR092C	0.00105004
NP21	D9	YNR072W	0.000949705
NP21	D10	YNR073C	0.000966673
NP21	D11	YNR074C	0.000837156
NP21	D12	YNR075W	0.000514157
NP21	E1	YOL013W-A	0.000936383
NP21	E2	YOL086C	0.00116925
NP21	E3	YOL087C	0.00129604
NP21	E4	YOL088C	0.000843429
NP21	E5	YOL089C	0.00102575
NP21	E6	YOL090W	0.000891504
NP21	E7	YOL091W	0.00066974
NP21	E8	YOL092W	0.000796983
NP21	E9	YOL093W	0.000888524
NP21	E10	YOL095C	0.00079582
NP21	E11	YOL096C	0.00109062
NP21	E12	YOL098C	0.00102304
NP21	F1	YOL100W	0.000929688
NP21	F2	YOL103W	0.00130575
NP21	F3	YOL104C	0.000796477
NP21	F4	YOL105C	0.000642819
NP21	F5	YOL107W	0.000925716
NP21	F6	YOL108C	0.000866087
[truncated: 3,774 more rows]

## Sheet: S5B) Controls & Cutoffs
rDNA repeat loss rates for control strains from the initial screen and validation run. Cutoffs used were based on rDNA repeat loss rates for +p5472 strain from the initial screen.
Initial screen				Validation
Strain	RDN25-MATα		Ratio	Strain	RDN25-MATα		Ratio
	WT	+p5472	WT/p5472		WT	+p5472	WT/p5472
Mean	0.00299049	0.000615648	4.85748	Mean	0.000374143	0.000440208	0.849924
SD	0.00121847	0.000221445		SD	5.3441e-05	8.84175e-05
Mean+2SD		0.00105854
Mean-2SD		0.000172757
Plate	Loss Rate			Plate	Loss Rate
	RDN25-MATα				RDN25-MATα
	WT	+p5472			WT	+p5472
NP40	0.00225852	0.000406561		Controls-2	0.000405538	0.000308396
NP41	0.00207657	0.000858907		Controls-2	0.000334595	0.000293406
NP1	0.00217873	0.00060501		Controls-2	0.00029489	0.000415995
NP2	0.00240532	0.000454487		Controls-2	0.00039692	0.000426671
NP3	0.00188918	0.000704873		Controls-2	0.000325615	0.000312087
NP4	0.00177589	0.000468776		Controls-2	0.000291378	0.000326083
NP5	0.00230314	0.000910365		Controls-2	0.00036098	0.000383879
NP6	0.00198631	0.000439109		Controls-2	0.000364199	0.000566716
NP7	0.00207128	0.000520085		Controls-2	0.000467822	0.000463869
NP8	0.00240412	0.000427966		Controls-2	0.000421501	0.000566909
NP9	0.00230821	0.000327848		Controls-2	0.000381327	0.000393002
NP10	0.00198107	0.000478098		Controls-2	0.000337903	0.000594286
NP11	0.00278937	0.000400869		Controls-2	0.000397212	0.000596985
NP12	0.00231886	0.000616006		Controls-2	0.000378919	0.00040895
NP13	0.000605586	0.000719931		Controls-2	0.0003474	0.000319599
NP14	0.002831	0.000616612		Controls-2	0.000376173	0.000344095
NP15	0.00311399	0.000934198		Controls-2	0.000381418	0.000488721
NP16	0.0030375	0.000594594		Controls-2	0.000486236	0.000400416
NP17	0.00291899	0.000584728		Controls-2	0.000328593	0.000391674
NP18	0.0030548	0.000636719		Controls-2	0.000353041	0.000355228
NP19	0.00595664	0.000762737		Controls-2	0.000346748	0.000401581
NP20	0.00333836	0.00112504		Controls-2	0.00030247	0.000365401
NP21	0.00881501	0.000346346		Controls-2	0.000284558	0.000361408
NP22	0.00417452	0.00109277		Controls-2	0.000406271	0.000397294
NP23	0.00386064	0.000856727		Controls-2	0.000455368	0.000446389
NP24	0.00370394	0.00122029		Controls-2	0.000468417	0.000472983
NP25	0.00267697	0.000678761		Controls-2	0.000488667	0.00043015
NP26	0.00282639	0.000510984		Controls-2	0.000325373	0.000394276
NP27	0.00286562	0.000673086		Controls-2	0.000370082	0.000529295
NP28	0.00273377	0.000600327		Controls-2	0.000375627	0.000372496
NP29	0.00279204	0.000573638		Controls-2	0.000368415	0.000478539
NP30	0.00235915	0.000700375		Controls-2	0.000308092	0.000467225
NP31	0.00218431	0.000515198		Controls-2	0.000371091	0.000394718
NP32	0.00332167	0.000579853		Controls-2	0.000347111	0.000528506
NP33	0.00411555	0.000780869		Controls-2	0.00033836	0.00055919
NP34	0.00391831	0.000634935		Controls-2	0.000454746	0.000485646
NP35	0.00330653	0.000456677		Controls-2	0.000374894	0.000568225
NP36	0.00224868	0.000416527		Controls-2	0.000338959	0.000589585
NP37	0.00368848	0.000907588		Controls-2	0.000434684	0.000494683
NP38	0.00297145	0.000784605		Controls-2	8 samples excluded based on cytometry data reflective of jackpot events	0.000408702
NP39	0.00259553	0.000869425		Controls-2		0.000398987
NP42	0.002221	0.00064153		Controls-2		0.000553139
NP43	0.0035952	0.000628348		Controls-2		0.000393101
NP44	0.00633599	0.000761117		Controls-2		0.000521813
NP45	0.00483821	0.000670836		Controls-2		0.000350255
NP46	0.00330635	0.000968985		Controls-2		0.000619492
NP47	0.00258169	0.000374818		Controls-2		0.000349739
EP1	0.00344871	0.000696087
EP2	0.00288393	0.000394573
EP4	0.00220576	0.000983538
EP5	0.00218218	0.00045704
EP6	0.00201576	0.000122832
EP7	0.00222393	0.000257207
EP8	0.00249044	0.000455933
EP9	0.00292664	0.000342422
EP10	0.00306784	0.000334349
EP11	0.00266407	0.000390167
EP12	0.00478978	0.000521554
EP13	0.00209935	0.000513439
EP3	0.00279084	0.00063158

## Sheet: S5C) HIGH instability hits
Plate	Well	ORF	Rate	Systematic name	Standard name	Gene summary	SGD Description
NP20	C9	YBL052C	0.0124172	YBL052C	SAS3	Something About Silencing	Histone acetyltransferase catalytic subunit of NuA3 complex; acetylates histone H3, involved in transcriptional silencing; homolog of the mammalian MOZ proto-oncogene; mutant has aneuploidy tolerance; sas3gcn5 double mutation is lethal
NP34	C7	YMR297W	0.0114184	YMR297W	PRC1	PRoteinase C	Vacuolar carboxypeptidase Y (proteinase C, CPY); broad-specificity C-terminal exopeptidase involved in non-specific protein degradation in the vacuole; involved, along with functional homolog Prc1p, in vacuolar zymogen activation, breakdown of the autophagic body, and autophagosome-dependent protein synthesis; role in phytochelatin synthesis; localizes to the vacuole lumen; member of the serine c…
NP21	A9	YAR002W	0.00937999	YAR002W	NUP60	NUclear Pore	FG-nucleoporin component of central core of the nuclear pore complex; contributes directly to nucleocytoplasmic transport and maintenance of the nuclear pore complex (NPC) permeability barrier and is involved in gene tethering at the nuclear periphery; relocalizes to the cytosol in response to hypoxia; both NUP1 and NUP60 are homologous to human NUP153
NP16	A11	YPR003C	0.00901171	YPR003C			Putative sulfate permease; physically interacts with Hsp82p; green fluorescent protein (GFP)-fusion protein localizes to the ER; YPR003C is not an essential gene
NP35	B7	YNL185C	0.00875034	YNL185C	MRPL19	Mitochondrial Ribosomal Protein, Large subunit	Mitochondrial ribosomal protein of the large subunit
NP37	C9	YLR431C	0.00783514	YLR431C	ATG23	AuTophaGy related	Peripheral membrane protein required for autophagy and CVT; required for cytoplasm-to-vacuole targeting (Cvt) pathway and efficient macroautophagy; cycles between the phagophore assembly site (PAS) and non-PAS locations; forms a complex with Atg9p and Atg27p
NP20	A1	YBL001C	0.00766655	YBL001C	ECM15	ExtraCellular Mutant	Non-essential protein of unknown function; likely exists as tetramer, may be regulated by the binding of small-molecule ligands (possibly sulfate ions), may have a role in yeast cell-wall biogenesis
NP46	H3	YOR312C	0.0070193	YOR312C	RPL20B	Ribosomal Protein of the Large subunit	Ribosomal 60S subunit protein L20B; homologous to mammalian ribosomal protein L18A, no bacterial homolog; RPL20B has a paralog, RPL20A, that arose from the whole genome duplication
NP39	B8	YLR425W	0.00685052	YLR425W	TUS1	TOR Unique function Suppressor	Guanine nucleotide exchange factor (GEF) that modulates Rho1p activity; involved in the cell integrity signaling pathway; interacts with Rgl1p; localization of Tus1p to the bed neck is regulated by Rgl1p; multicopy suppressor of tor2 mutation and ypk1 ypk2 double mutation; potential Cdc28p substrate
NP21	H9	YER113C	0.0068151	YER113C	TMN3	TransMembrane Nine	Protein with a role in cellular adhesion and filamentous growth; similar to Emp70p and Tmn2p; member of Transmembrane Nine family with 9 transmembrane segments; localizes to Golgi; induced by 8-methoxypsoralen plus UVA irradiation
NP34	F7	YNL280C	0.00664592	YNL280C	ERG24	ERGosterol biosynthesis	C-14 sterol reductase; acts in ergosterol biosynthesis; mutants accumulate the abnormal sterol ignosterol (ergosta-8,14 dienol), and are viable under anaerobic growth conditions but inviable on rich medium under aerobic conditions
NP22	B4	YER141W	0.00633531	YER141W	COX15	Cytochrome c OXidase	Heme a synthase; required for the hydroxylation of heme O to form heme A, an essential prosthetic group for cytochrome c oxidase; oligomerization is required for function
NP2	A3	YBR269C	0.00615579	YBR269C	SDH8	Succinate DeHydrogenase	Protein required for assembly of succinate dehydrogenase; interacts with flavinylated Sdh1p and may function as a chaperone for free Sdh1p, protecting its FAD cofactor from redox reactions before assembly of the complex; soluble protein of the mitochondrial matrix; respiratory defect of null mutant is functionally complemented by Drosophila and human orthologs
NP15	A1	YPL174C	0.0058959	YPL174C	NIP100	Nuclear ImPort	Large subunit of the dynactin complex; dynactin is involved in partitioning the mitotic spindle between mother and daughter cells; putative ortholog of mammalian p150(glued)
EP1	E7	YBR152W	0.00563412	YBR152W	SPP381	Suppressor of PrP38-1	mRNA splicing factor, component of U4/U6.U5 tri-snRNP; interacts genetically and physically with Prp38p; relocalizes to the cytosol in response to hypoxia
NP34	A8	YMR275C	0.00552632	YMR275C	BUL1	Binds Ubiquitin Ligase	Ubiquitin-binding component of the Rsp5p E3-ubiquitin ligase complex; disruption causes temperature-sensitive growth, overexpression causes missorting of amino acid permeases; BUL1 has a paralog, BUL2, that arose from the whole genome duplication
EP1	C1	YBL074C	0.00543075	YBL074C	AAR2	A1-Alpha2 Repression	Component of the U5 snRNP complex; required for splicing of U3 precursors; originally described as a splicing factor specifically required for splicing pre-mRNA of the MATa1 cistron
NP36	G7	YMR029C	0.00534082	YMR029C	FAR8	Factor ARrest	Protein involved in recovery from arrest in response to pheromone; acts in a cell cycle arrest recovery pathway independent from Far1p; interacts with Far3p, Far7p, Far9p, Far10p, and Far11p
EP2	G11	YDR182W	0.00533864	YDR182W	CDC1	Cell Division Cycle	Putative mannose-ethanolamine phosphate phosphodiesterase; involved in GPI-anchor remodeling prior to the attachment of cell wall proteins to beta 1,3-glucan, removing ethanolamine phosphate from the first mannose of GPI anchors; mutants display elevated Ca2+-dependent signaling resulting in secondary actin polarization and Golgi inheritance defects; enzyme is Mn2+-dependent; mutants have cell di…
NP32	H12	YLR069C	0.00523676	YLR069C	MEF1	Mitochondrial Elongation Factor	Mitochondrial elongation factor involved in translational elongation
EP1	H4	YCR054C	0.00523554	YCR054C	CTR86	Copper TRansport protein	Essential protein of unknown function; with orthologs in Ashbya gossypii and Candida albicans; similar to human ATXN10, mutations in which cause spinocerebellar ataxia type 10; codon usage corresponds to that observed for yeast genes expressed at low levels; relative distribution to the nucleus increases upon DNA replication stress
EP2	G6	YDR168W	0.00523501	YDR168W	CDC37	Cell Division Cycle	Essential Hsp90p co-chaperone; necessary for passage through the START phase of the cell cycle; stabilizes protein kinase nascent chains and participates along with Hsp90p in their folding
EP1	E1	YBR123C	0.00520798	YBR123C	TFC1	Transcription Factor class C	Subunit of RNA polymerase III transcription initiation factor complex; one of six subunits of the RNA polymerase III transcription initiation factor complex (TFIIIC); part of the TauA globular domain of TFIIIC that binds DNA at the BoxA promoter sites of tRNA and similar genes; human homolog is TFIIIC-63
NP35	C6	YNL160W	0.00490698	YNL160W	YGP1	Yeast GlycoProtein	Cell wall-related secretory glycoprotein; induced by nutrient deprivation-associated growth arrest and upon entry into stationary phase; may be involved in adaptation prior to stationary phase entry; YGP1 has a paralog, SPS100, that arose from the whole genome duplication
NP15	E9	YPL079W	0.00482694	YPL079W	RPL21B	Ribosomal Protein of the Large subunit	Ribosomal 60S subunit protein L21B; homologous to mammalian ribosomal protein L21, no bacterial homolog; RPL21B has a paralog, RPL21A, that arose from the whole genome duplication
NP16	C4	YPR138C	0.00480584	YPR138C	MEP3		Ammonium permease of high capacity and low affinity; belongs to Mep-Amt-Rh family of well-conserved ammonium (NH4+) transporters that includes the human Rh factors; expression is under the nitrogen catabolite repression regulation ammonia permease activity regulated by TORC1 effectors, Npr1p and Par32p; MEP3 has a paralog, MEP1, that arose from the whole genome duplication
EP3	F10	YER018C	0.00477049	YER018C	SPC25	Spindle Pole Component	Component of the kinetochore-associated Ndc80 complex; involved in chromosome segregation, spindle checkpoint activity, and kinetochore clustering; evolutionarily conserved; other members include Ndc80p, Nuf2p, Spc24p, and Spc25p
NP34	C3	YMR292W	0.00471305	YMR292W	GOT1	GOlgi Transport	Homodimeric protein that is packaged into COPII vesicles; cycles between the ER and Golgi; involved in secretory transport but not directly required for aspects of transport assayed in vitro; may influence membrane composition
NP24	B10	YBR078W	0.00469278	YBR078W	ECM33	ExtraCellular Mutant	GPI-anchored protein of unknown function; possible role in apical bud growth; GPI-anchoring on the plasma membrane crucial to function; phosphorylated in mitochondria; similar to Sps2p; ECM33 has a paralog, PST1, that arose from the whole genome duplication
NP34	E2	YNL321W	0.00463793	YNL321W	VNX1	Vacuolar Na+/H+ eXchanger	Calcium/H+ antiporter localized to the endoplasmic reticulum membrane; member of the calcium exchanger (CAX) family; potential Cdc28p substrate
NP22	B3	YER140W	0.0043902	YER140W	EMP65	ER Membrane Protein of 65 kDa	Integral membrane protein of the ER; forms an ER-membrane associated protein complex with Slp1p; identified along with SLP1 in a screen for mutants defective in the unfolded protein response (UPR); proposed to function in the folding of integral membrane proteins; interacts genetically with MPS3; the authentic, non-tagged protein is detected in highly purified mitochondria in high-throughput stud…
EP10	F4	YOR319W	0.00435619	YOR319W	HSH49	Human Sap Homolog	U2-snRNP associated splicing factor; similar to the mammalian splicing factor SAP49; proposed to function as a U2-snRNP assembly factor along with Hsh155p and binding partner Cus1p; contains two RNA recognition motifs (RRM)
NP46	D10	YNL004W	0.00429796	YNL004W	HRB1	Hypothetical RNA-Binding protein	Poly(A+) RNA-binding protein; key surveillance factor for the selective export of spliced mRNAs from the nucleus to the cytoplasm; preference for intron-containing genes; similar to Npl3p; HRB1 has a paralog, GBP2, that arose from the whole genome duplication
NP20	F2	YAL062W	0.0042661	YAL062W	GDH3	Glutamate DeHydrogenase	NADP(+)-dependent glutamate dehydrogenase; synthesizes glutamate from ammonia and alpha-ketoglutarate; rate of alpha-ketoglutarate utilization differs from Gdh1p; expression regulated by nitrogen and carbon sources; GDH3 has a paralog, GDH1, that arose from the whole genome duplication
NP32	G12	YLR046C	0.00419413	YLR046C			Putative membrane protein; member of the fungal lipid-translocating exporter (LTE) family of proteins; transcription is activated by paralogous transcription factors Yrm1p and Yrr1p along with genes involved in multidrug resistance; YLR046C has a paralog, RTA1, that arose from the whole genome duplication
NP19	C7	YGR087C	0.00417264	YGR087C	PDC6	Pyruvate DeCarboxylase	Minor isoform of pyruvate decarboxylase; decarboxylates pyruvate to acetaldehyde, involved in amino acid catabolism; transcription is glucose- and ethanol-dependent, and is strongly induced during sulfur limitation
NP18	C11	YNL079C	0.00409496	YNL079C	TPM1	TroPoMyosin	Major isoform of tropomyosin; binds to and stabilizes actin cables and filaments, which direct polarized cell growth and the distribution of several organelles; acetylated by the NatB complex and acetylated form binds actin most efficiently; TPM1 has a paralog, TPM2, that arose from the whole genome duplication
NP39	C7	YML123C	0.00407768	YML123C	PHO84	PHOsphate metabolism	High-affinity inorganic phosphate (Pi) transporter; also low-affinity manganese transporter; regulated by Pho4p and Spt7p; mutation confers resistance to arsenate; exit from the ER during maturation requires Pho86p; cells overexpressing Pho84p accumulate heavy metals but do not develop symptoms of metal toxicity
NP34	D6	YNL335W	0.00398227	YNL335W	DDI3	DNA Damage Inducible	Cyanamide hydratase that detoxifies cyanamide; member of the HD domain metalloprotein superfamily; expression is induced over 100-fold by cyanamide and by SN2-type DNA alkylating agents such as MMS and DMA; induction decreased in rad6 and rad18 mutants; gene and protein are identical to DDI2 and Ddi2p
NP46	E12	YPL037C	0.00392991	YPL037C	EGD1	Enhancer of Gal4 DNA binding	Subunit beta1 of the nascent polypeptide-associated complex (NAC); involved in protein targeting, associated with cytoplasmic ribosomes; enhances DNA binding of the Gal4p activator; homolog of human BTF3b; EGD1 has a paralog, BTT1, that arose from the whole genome duplication
NP15	B5	YPL145C	0.00389992	YPL145C	KES1	KrE11-1 Suppressor	One of seven members of the yeast oxysterol binding protein family; involved in negative regulation of Sec14p-dependent Golgi complex secretory functions, peripheral membrane protein that localizes to the Golgi complex; KES1 has a paralog, HES1, that arose from the whole genome duplication
NP23	D12	YMR322C	0.00374348	YMR322C	SNO4	SNZ proximal Open reading frame	Possible chaperone and cysteine protease; required for transcriptional reprogramming during the diauxic shift and for survival in stationary phase; similar to bacterial Hsp31 and yeast Hsp31p, Hsp32p, and Hsp33p; DJ-1/ThiJ/PfpI superfamily member; predicted involvement in pyridoxine metabolism; induced by mild heat stress and copper deprivation
NP46	B12	YER049W	0.00374148	YER049W	TPA1	Termination and PolyAdenylation	Fe(II)/2-oxoglutarate-dependent dioxygenase family member; catalyzes the repair of methyl-base lesions in both ss and dsDNA by oxidative demethylation; Poly(rA)-binding protein involved in mRNA poly(A) tail length and mRNA stability; role in translation termination efficiency; interacts with Sup45p (eRF1), Sup35p (eRF3) and Pab1p; similar to human prolyl 4-hydroxylase OGFOD1; binds Fe(II) and 2-o…
NP35	G7	YNL046W	0.00365668	YNL046W			Putative protein of unknown function; expression depends on Swi5p; GFP-fusion protein localizes to the endoplasmic reticulum; deletion confers sensitivity to 4-(N-(S-glutathionylacetyl)amino) phenylarsenoxide (GSAO)
EP10	F5	YOR326W	0.00357433	YOR326W	MYO2	MYOsin	Type V myosin motor involved in actin-based transport of cargos; required for the polarized delivery of secretory vesicles, the vacuole, late Golgi elements, peroxisomes, and the mitotic spindle; MYO2 has a paralog, MYO4, that arose from the whole genome duplication
NP19	C3	YGR077C	0.00352024	YGR077C	PEX8	PEroXin	Intraperoxisomal organizer of the peroxisomal import machinery; organizes the formation of the importomer complex, bridging the docking complex with the RING finger complex; tightly associated with the lumenal face of the peroxisomal membrane; essential for peroxisome biogenesis; binds PTS1-signal receptor Pex5p, and PTS2-signal receptor Pex7p
NP39	F6	YKR106W	0.00345052	YKR106W	GEX2	Glutathione EXchanger	Proton:glutathione antiporter; localized to the vacuolar and plasma membranes; expressed at a very low level; potential role in resistance to oxidative stress and modulation of the PKA pathway; GEX2 has a paralog, GEX1, that arose from a segmental duplication
NP24	B3	YBR067C	0.00336484	YBR067C	TIP1	Temperature shock-Inducible Protein	Major cell wall mannoprotein with possible lipase activity; transcription is induced by heat- and cold-shock; member of the Srp1p/Tip1p family of serine-alanine-rich proteins
NP2	H12	YDR337W	0.00334965	YDR337W	MRPS28	Mitochondrial Ribosomal Protein, Small subunit	Mitochondrial ribosomal protein of the small subunit
NP35	H3	YNR008W	0.00332856	YNR008W	LRO1	Lecithin cholesterol acyl transferase Related Open reading frame	Acyltransferase that catalyzes diacylglycerol esterification; one of several acyltransferases that contribute to triglyceride synthesis; Lro1p and Dga1p can O-acylate ceramides; putative homolog of human lecithin cholesterol acyltransferase
NP36	B9	YOR198C	0.003317	YOR198C	BFR1	BreFeldin A Resistance	Component of mRNP complexes associated with polyribosomes; involved in localization of mRNAs to P bodies; implicated in secretion and nuclear segregation; multicopy suppressor of BFA (Brefeldin A) sensitivity
NP14	B1	YIR027C	0.00323899	YIR027C	DAL1	Degradation of Allantoin	Allantoinase; converts allantoin to allantoate in the first step of allantoin degradation; expression sensitive to nitrogen catabolite repression
NP46	H6	YOR368W	0.00320533	YOR368W	RAD17	RADiation sensitive	Checkpoint protein; involved in the activation of the DNA damage and meiotic pachytene checkpoints; with Mec3p and Ddc1p, forms a clamp that is loaded onto partial duplex DNA; homolog of human and S. pombe Rad1 and U. maydis Rec1 proteins
NP32	E5	YLL053C	0.00320386	YLL053C			Putative protein; in the Sigma 1278B strain background YLL053C is contiguous with AQY2 which encodes an aquaporin
NP3	D7	YNL274C	0.00319141	YNL274C	GOR1	GlyOxylate Reductase	Glyoxylate reductase; null mutation results in increased biomass after diauxic shift; the authentic, non-tagged protein is detected in highly purified mitochondria in high-throughput studies; protein abundance increases in response to DNA replication stress
NP34	G5	YNL259C	0.00312573	YNL259C	ATX1	AnTioXidant	Cytosolic copper metallochaperone; transports copper to the secretory vesicle copper transporter Ccc2p for eventual insertion into Fet3p, which is a multicopper oxidase required for high-affinity iron uptake; human homolog ATOX1 can complement yeast atx1 mutant; overexpression of human ATOX1 suppresses lysine auxotrophy of the yeast sod1 null mutant, as does overexpression of yeast ATX1
NP16	G10	YJR043C	0.00310335	YJR043C	POL32	POLymerase	Third subunit of DNA polymerase delta; involved in chromosomal DNA replication; required for error-prone DNA synthesis in the presence of DNA damage and processivity; forms a complex with Rev3p, Rev7p and Pol31p; interacts with Hys2p, PCNA (Pol30p), and Pol1p
NP16	C5	YPR139C	0.0030423	YPR139C	LOA1	Lysophosphatidic acid: Oleoyl-CoA Acyltransferase	Lysophosphatidic acid acyltransferase; involved in triacelglyceride homeostasis and lipid droplet formation; localized to lipid droplets and the ER; specificity for oleoyl-CoA
NP33	F6	YLR404W	0.00304205	YLR404W	SEI1	SEIpin	Seipin involved in lipid droplet (LD) assembly; controls lipid particle morphology, number, and size; promotes initiation of LD formation on the ER; ensures that LDs bud from the ER towards the cytosolic side of the membrane; forms a complex with Ldb16p at ER-LD contact sites, stabilizing these sites; null mutants have localized accumulation of phosphatidic acid (PA) marker proteins; BSCL2, human…
NP17	C11	YKL201C	0.0030381	YKL201C	MNN4	MaNNosyltransferase	Putative positive regulator of mannosylphosphate transferase Mnn6p; involved in mannosylphosphorylation of N-linked oligosaccharides; expression increases in late-logarithmic and stationary growth phases; coding sequence contains length polymorphisms in different strains; MNN4 has a paralog, YJR061W, that arose from the whole genome duplication
EP2	H8	YDR224C	0.00301727	YDR224C	HTB1	Histone h Two B	Histone H2B; core histone protein required for chromatin assembly and chromosome function; nearly identical to HTB2; Rad6p-Bre1p-Lge1p mediated ubiquitination regulates reassembly after DNA replication, transcriptional activation, meiotic DSB formation and H3 methylation
EP2	A6	YDL031W	0.00295328	YDL031W	DBP10	Dead Box Protein	Putative ATP-dependent RNA helicase of the DEAD-box protein family; constituent of 66S pre-ribosomal particles; essential protein involved in ribosome biogenesis
NP16	H4	YJR054W	0.00293585	YJR054W	KCH1	Potassium (K) regulator of CcH1	Potassium transporter that mediates K+ influx; activates high-affinity Ca2+ influx system (HACS) during mating pheromone response; expression up-regulated in response to alpha factor; localized to sites of polarized growth; member of a fungal-specific gene family; potential Cdc28p substrate; KCH1 has a paralog, PRM6, that arose from the whole genome duplication
NP34	A6	YMR273C	0.0029356	YMR273C	ZDS1	Zillion Different Screens	Protein with a role in regulating Swe1p-dependent polarized growth; involved in maintaining Cdc55p in the cytoplasm where it promotes mitotic entry; involved in mitotic exit through Cdc14p regulation; interacts with silencing proteins at telomeres; has a role in Bcy1p localization; implicated in mRNA nuclear export; ZDS1 has a paralog, ZDS2, that arose from the whole genome duplication
NP22	C10	YER167W	0.00292569	YER167W	BCK2	Bypass of C Kinase	Serine/threonine-rich protein involved in PKC1 signaling pathway; protein kinase C (PKC1) signaling pathway controls cell integrity; overproduction suppresses pkc1 mutations
NP14	B3	YIR031C	0.0029167	YIR031C	DAL7	Degradation of Allantoin	Malate synthase; can accept butyryl-CoA as acyl-CoA donor in addition to traditional substrate acetyl-CoA; recycles glyoxylate generated during allantoin degradation; SWAT-GFP and mCherry fusion proteins localize to the cytosol; expression sensitive to nitrogen catabolite repression and induced by allophanate, an intermediate in allantoin degradation
NP22	C5	YER161C	0.00289558	YER161C	SPT2	SuPpressor of Ty's	Protein involved in negative regulation of transcription; required for RNA polyadenylation; exhibits regulated interactions with both histones and SWI-SNF components; relocalizes to the cytosol in response to hypoxia; similar to mammalian HMG1 proteins
NP13	E4	YPL248C	0.00284876	YPL248C	GAL4	GALactose metabolism	DNA-binding transcription factor required for activating GAL genes; responds to galactose; repressed by Gal80p and activated by Gal3p
NP24	A11	YBR062C	0.00281749	YBR062C			Protein of unknown function that interacts with Msb2p; may play a role in activation of the filamentous growth pathway
EP10	D5	YOR206W	0.00280076	YOR206W	NOC2	NucleOlar Complex associated	Protein involved in ribosome biogenesis; forms a nucleolar complex with Mak21p that binds to 90S and 66S pre-ribosomes; forms a nuclear complex with Noc3p that binds to 66S pre-ribosomes; both complexes mediate intranuclear transport of ribosomal precursors; acts as part of a Mak21p-Noc2p-Rrp5p module that associates with nascent pre-rRNA during transcription and has a role in bigenesis of the la…
NP19	B2	YGR052W	0.00279939	YGR052W	FMP48	Found in Mitochondrial Proteome	Putative protein of unknown function; the authentic, non-tagged protein is detected in highly purified mitochondria in high-throughput studies; induced by treatment with 8-methoxypsoralen and UVA irradiation
NP14	C2	YKR067W	0.00279006	YKR067W	GPT2	Glycerol-3-Phosphate acylTransferase	Glycerol-3-phosphate/dihydroxyacetone phosphate sn-1 acyltransferase; located in lipid particles and the ER; involved in the stepwise acylation of glycerol-3-phosphate and dihydroxyacetone in lipid biosynthesis; the most conserved motifs and functionally relevant residues are oriented towards the ER lumen
NP16	B10	YPR127W	0.00270248	YPR127W			Putative pyridoxine 4-dehydrogenase; differentially expressed during alcoholic fermentation; expression activated by transcription factor YRM1/YOR172W; green fluorescent protein (GFP)-fusion protein localizes to both the cytoplasm and the nucleus
NP37	D9	YHR017W	0.00264547	YHR017W	YSC83		Non-essential mitochondrial protein of unknown function; mRNA induced during meiosis, peaking between mid to late prophase of meiosis I; similar to S. douglasii YSD83
NP9	G10	YHR018C	0.00263592	YHR018C	ARG4	ARGinine requiring	Argininosuccinate lyase; catalyzes the final step in the arginine biosynthesis pathway
NP16	B7	YPR122W	0.00263245	YPR122W	AXL1	AXiaL budding	Haploid specific endoprotease of a-factor mating pheromone; performs one of two N-terminal cleavages during maturation of a-factor mating pheromone; required for axial budding pattern of haploid cells
NP37	A12	YBR286W	0.00261089	YBR286W	APE3	AminoPEptidase	Vacuolar aminopeptidase Y; processed to mature form by Prb1p
NP14	E10	YLR449W	0.0026018	YLR449W	FPR4	FKBP Proline Rotamase (isomerase)	Peptidyl-prolyl cis-trans isomerase (PPIase); nuclear proline isomerase; affects expression of multiple genes via its role in nucleosome assembly; catalyzes isomerization of proline residues in histones H3 and H4, which affects lysine methylation of those histones; PPIase domain acts as a transcriptional repressor when tethered to DNA by lexA, and repressor activity is dependent on PPIase activit…
NP39	H9	YGL006W	0.00257805	YGL006W	PMC1	Plasma Membrane Calcium	Vacuolar Ca2+ ATPase involved in depleting cytosol of Ca2+ ions; prevents growth inhibition by activation of calcineurin in the presence of elevated concentrations of calcium; similar to mammalian PMCA1a
NP32	H6	YLR057W	0.00257206	YLR057W	MNL2	MaNnosidase-Like protein	Putative mannosidase involved in ER-associated protein degradation; localizes to the endoplasmic reticulum; sequence similarity with seven-hairpin glycosidase (GH47) family members, such as Mns1p and Mnl1p, that hydrolyze 1,2-linked alpha-D-mannose residues; non-essential gene
NP9	A11	YLR258W	0.00256391	YLR258W	GSY2	Glycogen SYnthase	Glycogen synthase; expression induced by glucose limitation, nitrogen starvation, heat shock, and stationary phase; activity regulated by cAMP-dependent, Snf1p and Pho85p kinases as well as by the Gac1p-Glc7p phosphatase; GSY2 has a paralog, GSY1, that arose from the whole genome duplication; relocalizes from cytoplasm to plasma membrane upon DNA replication stress
EP10	F11	YOR353C	0.00253863	YOR353C	SOG2		Key component of the RAM signaling network; required for proper cell morphogenesis and cell separation after mitosis
NP35	B10	YNL177C	0.00252475	YNL177C	MRPL22	Mitochondrial Ribosomal Protein, Large subunit	Mitochondrial ribosomal protein of the large subunit
NP22	G9	YFR036W	0.00252386	YFR036W	CDC26	Cell Division Cycle	Subunit of the Anaphase-Promoting Complex/Cyclosome (APC/C); which is a ubiquitin-protein ligase required for degradation of anaphase inhibitors, including mitotic cyclins, during the metaphase/anaphase transition; relocalizes to the cytosol in response to hypoxia
NP23	C11	YGR254W	0.00251936	YGR254W	ENO1	ENOlase	Enolase I, a phosphopyruvate hydratase; catalyzes conversion of 2-phosphoglycerate to phosphoenolpyruvate during glycolysis and the reverse reaction during gluconeogenesis; expression repressed in response to glucose; protein abundance increases in response to DNA replication stress; N-terminally propionylated in vivo; ENO1 has a paralog, ENO2, that arose from the whole genome duplication
NP33	D8	YLR348C	0.00250678	YLR348C	DIC1	DIcarboxylate Carrier	Mitochondrial dicarboxylate carrier; integral membrane protein, catalyzes a dicarboxylate-phosphate exchange across the inner mitochondrial membrane, transports cytoplasmic dicarboxylates into the mitochondrial matrix
NP20	C11	YBL056W	0.00249965	YBL056W	PTC3	Phosphatase Two C	Type 2C protein phosphatase (PP2C); dephosphorylates Hog1p (see also Ptc2p) to limit maximal kinase activity induced by osmotic stress; dephosphorylates T169 phosphorylated Cdc28p (see also Ptc2p); role in DNA damage checkpoint inactivation; PTC3 has a paralog, PTC2, that arose from the whole genome duplication
NP3	F11	YPR021C	0.00249298	YPR021C	AGC1	Aspartate-Glutamate Carrier	Mitochondrial amino acid transporter; acts both as a glutamate uniporter and as an aspartate-glutamate exchanger; involved in nitrogen metabolism and nitrogen compound biosynthesis; human homolog SLC25A13 complements yeast null mutant
NP14	F5	YML021C	0.00249224	YML021C	UNG1	Uracil DNA N-Glycosylase	Uracil-DNA glycosylase; required for repair of uracil in DNA formed by spontaneous cytosine deamination; efficiently excises uracil from single-stranded DNA in vivo; not required for strand-specific mismatch repair; cell-cycle regulated, expressed in late G1; localizes to mitochondria and nucleus
EP2	F5	YDR082W	0.00244755	YDR082W	STN1	Suppressor of cdc ThirteeN	Telomere end-binding and capping protein; plays a key role with Pol12p in linking telomerase action with completion of lagging strand synthesis, and in a regulatory step required for telomere capping; similar to human Stn1
NP33	D6	YLR344W	0.00243968	YLR344W	RPL26A	Ribosomal Protein of the Large subunit	Ribosomal 60S subunit protein L26A; binds to 5.8S rRNA; non-essential even when paralog is also deleted; deletion has minimal affections on ribosome biosynthesis; homologous to mammalian ribosomal protein L26 and bacterial L24; RPL26A has a paralog, RPL26B, that arose from the whole genome duplication
NP36	B5	YOR193W	0.00239964	YOR193W	PEX27	PEroXisome related	Peripheral peroxisomal membrane protein; involved in controlling peroxisome size and number, interacts with Pex25p; PEX27 has a paralog, PEX25, that arose from the whole genome duplication
NP41	B6	YML068W	0.00239129	YML068W	ITT1	Inhibitor of Translation Termination	Protein that modulates the efficiency of translation termination; interacts with translation release factors eRF1 (Sup45p) and eRF3 (Sup35p) in vitro, contains a zinc finger domain characteristic of the TRIAD class of proteins
NP16	C3	YPR135W	0.00239076	YPR135W	CTF4	Chromosome Transmission Fidelity	Chromatin-associated protein; required for sister chromatid cohesion; interacts with DNA polymerase alpha (Pol1p) and may link DNA synthesis to sister chromatid cohesion
EP1	B12	YBL050W	0.00238789	YBL050W	SEC17	SECretory	Alpha-SNAP cochaperone; SNARE-complex adaptor for Sec18 (NSF) during the disassembly of postfusion cis-SNARE complexes; stimulates the ATPase activity of Sec18p; peripheral membrane protein required for vesicular transport between ER and Golgi, the 'priming' step in homotypic vacuole fusion, and autophagy; similar to mammalian alpha-SNAP
NP15	C6	YPL121C	0.00234614	YPL121C	MEI5	MEIosis	Meiosis-specific protein involved in meiotic recombination; involved in DMC1-dependent meiotic recombination; forms heterodimer with Sae3p; proposed to be an assembly factor for Dmc1p
EP10	A8	YOR004W	0.00232723	YOR004W	UTP23	U Three-associated Protein	Component of the small subunit processome; involved in 40S ribosomal subunit biogenesis; interacts with snR30 and is required for dissociation of snR30 from large pre-ribosomal particles; has homology to PINc domain protein Fcf1p, although the PINc domain of Utp23p is not required for function; essential protein
NP37	H8	YER019W	0.00232147	YER019W	ISC1	Inositol phosphoSphingolipid phospholipase C	Inositol phosphosphingolipid phospholipase C; mitochondrial membrane localized; hydrolyzes complex sphingolipids to produce ceramide; activates genes required for non-fermentable carbon source metabolism during diauxic shift; activated by phosphatidylserine, cardiolipin, and phosphatidylglycerol; mediates Na+ and Li+ halotolerance; ortholog of mammalian neutral sphingomyelinase type 2
NP37	B7	YCR036W	0.00231977	YCR036W	RBK1	RiBoKinase	Putative ribokinase
NP38	B7	YGR141W	0.00230698	YGR141W	VPS62	Vacuolar Protein Sorting	Vacuolar protein sorting (VPS) protein; required for cytoplasm to vacuole targeting of proteins; VPS62 has a paralog, TDA6, that arose from the whole genome duplication
NP14	G8	YNR063W	0.00228384	YNR063W	PUL4	PULcherrimin	Putative zinc-cluster protein of unknown function
NP36	F1	YML017W	0.0022769	YML017W	PSP2	Polymerase SuPpressor	Asn rich cytoplasmic protein that contains RGG motifs; high-copy suppressor of group II intron-splicing defects of a mutation in MRS2 and of a conditional mutation in POL1 (DNA polymerase alpha); possible role in mitochondrial mRNA splicing
NP15	F4	YPL066W	0.00227075	YPL066W	RGL1	Rho1 GEF Localizing	Regulator of Rho1p signaling, cofactor of Tus1p; required for the localization of Tus1p during all phases of cytokinesis; green fluorescent protein (GFP)-fusion protein localizes to the bud neck and cytoplasm; null mutant is viable and exhibits growth defect on a non-fermentable (respiratory) carbon source
NP33	C9	YLR324W	0.00222541	YLR324W	PEX30	PEroXisome related	ER-resident protein involved in peroxisomal biogenesis; ER-localized protein that associates with peroxisomes; interacts with Pex29p and reticulons Rtn1p and Yop1p to regulate peroxisome biogenesis from the ER; role in peroxisomal-destined vesicular flow from the ER; partially redundant with Pex31p; may function at a step downstream of steps mediated by Pex28p and Pex29p; PEX30 has a paralog, PEX…
NP18	B8	YCR088W	0.00222186	YCR088W	ABP1	Actin Binding Protein	Actin-binding protein of the cortical actin cytoskeleton; important for activation of actin nucleation mediated by the Arp2/Arp3 complex; inhibits actin filament elongation at the barbed-end; phosphorylation within its proline-rich region, mediated by Cdc28p and Pho85p, protects Abp1p from PEST sequence-mediated proteolysis; mammalian homolog of HIP-55 (hematopoietic progenitor kinase 1 [HPK1]-in…
NP41	C6	YDR174W	0.00221742	YDR174W	HMO1	High MObility group (HMG) family	Chromatin associated high mobility group (HMG) family member; involved in compacting, bending, bridging and looping DNA; rDNA-binding component that regulates transcription from RNA polymerase I promoters; regulates start site selection of ribosomal protein genes via RNA polymerase II promoters; role in genome maintenance; associates with a 5'-3' DNA helicase and Fpr1p, a prolyl isomerase; reloca…
NP23	G11	YBR025C	0.00219214	YBR025C	OLA1	Obg-Like ATPase	P-loop ATPase with similarity to human OLA1 and bacterial YchF; identified as specifically interacting with the proteasome; null mutant displays increased translation rate and increased readthrough of premature stop codons; protein abundance increases in response to hydrogen peroxide and to DNA replication stress
NP16	G3	YJR025C	0.00218333	YJR025C	BNA1	Biosynthesis of Nicotinic Acid	3-hydroxyanthranilic acid dioxygenase; required for the de novo biosynthesis of NAD from tryptophan via kynurenine; expression regulated by Hst1p
NP28	F4	YGL205W	0.00215696	YGL205W	POX1		Fatty-acyl coenzyme A oxidase; involved in the fatty acid beta-oxidation pathway; localized to the peroxisomal matrix
EP1	A1	YAL001C	0.00214759	YAL001C	TFC3	Transcription Factor class C	Subunit of RNA polymerase III transcription initiation factor complex; part of TauB domain of TFIIIC that binds DNA at BoxB promoter sites of tRNA and similar genes; cooperates with Tfc6p in DNA binding; largest of six subunits of RNA polymerase III transcription initiation factor complex (TFIIIC); colocalizes with condensin at pol III genes and several ETC (â€œextra TFIIIC)â€ sites; may have a …
NP46	G9	YOR233W	0.00214152	YOR233W	KIN4	KINase	Serine/threonine protein kinase; inhibits the mitotic exit network (MEN) when the spindle position checkpoint is activated; localized asymmetrically to mother cell cortex, spindle pole body and bud neck; KIN4 has a paralog, FRK1, that arose from the whole genome duplication
NP16	C2	YPR132W	0.00213132	YPR132W	RPS23B	Ribosomal Protein of the Small subunit	Ribosomal protein 28 (rp28) of the small (40S) ribosomal subunit; required for translational accuracy; homologous to mammalian ribosomal protein S23 and bacterial S12; RPS23B has a paralog, RPS23A, that arose from the whole genome duplication; deletion of both RPS23A and RPS23B is lethal
NP13	G7	YPL199C	0.00212847	YPL199C			Putative protein of unknown function; predicted to be palmitoylated
NP44	F6	YGL202W	0.00211445	YGL202W	ARO8	AROmatic amino acid requiring	Aromatic aminotransferase I; expression is regulated by general control of amino acid biosynthesis
NP22	E1	YER186C	0.00210152	YER186C			Putative protein of unknown function
NP18	C8	YNL074C	0.00209491	YNL074C	MLF3	Multicopy suppressor of LeFlunomide sensitivity	Serine-rich protein of unknown function; predicted to be palmitoylated; overproduction suppresses growth inhibition caused by exposure to immunosuppressant leflunomide; MLF3 has a paralog, VHS2, that arose from the whole genome duplication
NP32	E2	YLL046C	0.0020888	YLL046C	RNP1	RiboNucleoProtein	Ribonucleoprotein that contains two RNA recognition motifs (RRM); RNP1 has a paralog, SBP1, that arose from the whole genome duplication
NP41	D9	YBR295W	0.00207075	YBR295W	PCA1	P-type Cation-transporting ATPase	Cadmium transporting P-type ATPase; may also have a role in copper and iron homeostasis; stabilized by Cd binding, which prevents ubiquitination; S288C and other lab strains contain a G970R mutation which eliminates Cd transport function
NP37	G1	YDR153C	0.00205521	YDR153C	ENT5	Epsin N-Terminal homology	Protein containing an N-terminal epsin-like domain; involved in clathrin recruitment and traffic between the Golgi and endosomes; associates with the clathrin adaptor Gga2p, clathrin adaptor complex AP-1, and clathrin
NP15	G3	YPL050C	0.00205103	YPL050C	MNN9	MaNNosyltransferase	Subunit of Golgi mannosyltransferase complex; this complex mediates elongation of the polysaccharide mannan backbone; forms a separate complex with Van1p that is also involved in backbone elongation; this complex also contains Anp1p, Mnn10p, Mnn11p, and Hoc1p
NP23	E8	YOR275C	0.00202867	YOR275C	RIM20	Regulator of IME2	Protein involved in proteolytic activation of Rim101p; part of response to alkaline pH; PalA/AIP1/Alix family member; interaction with the ESCRT-III subunit Snf7p suggests a relationship between pH response and multivesicular body formation
NP44	E8	YER016W	0.00202084	YER016W	BIM1	BInding to Microtubules	Microtubule plus end-tracking protein; together with Kar9p makes up the cortical microtubule capture site and delays the exit from mitosis when the spindle is oriented abnormally; homolog of human end binding protein 1 (EB1)
NP4	C5	YHR143W	0.00199527	YHR143W	DSE2	Daughter Specific Expression	Daughter cell-specific secreted protein with similarity to glucanases; degrades cell wall from the daughter side causing daughter to separate from mother; expression is repressed by cAMP
NP25	D9	YGL154C	0.00198647	YGL154C	LYS5	LYSine requiring	Phosphopantetheinyl transferase involved in lysine biosynthesis; converts inactive apo-form of Lys2p (alpha-aminoadipate reductase) into catalytically active holo-form by posttranslational addition of phosphopantetheine
NP37	F10	YDR030C	0.00197768	YDR030C	RAD28	RADiation sensitive	Protein involved in DNA repair; related to the human CSA protein that is involved in transcription-coupled repair nucleotide excision repair
NP24	E1	YDR200C	0.00196915	YDR200C	VPS64	Vacuolar Protein Sorting	Protein required for cytoplasm to vacuole targeting of proteins; forms a complex with Far3p and Far7p to Far11p involved in recovery from pheromone-induced cell cycle arrest; mutant has increased aneuploidy tolerance; VPS64 has a paralog, FAR10, that arose from the whole genome duplication
NP23	C12	YGR257C	0.00196886	YGR257C	MTM1	Manganese Trafficking factor for Mitochondrial SOD2	Mitochondrial protein of the mitochondrial carrier family; high affinity pyridoxal 5'-phosphate (PLP) transporter, important for delivery of the PLP cofactor to mitochondrial enzymes; involved in mitochondrial iron homeostasis
NP20	G4	YAL040C	0.00196717	YAL040C	CLN3	CycLiN	G1 cyclin involved in cell cycle progression; activates Cdc28p kinase to promote G1 to S phase transition; plays a role in regulating transcription of other G1 cyclins, CLN1 and CLN2; regulated by phosphorylation and proteolysis; acetyl-CoA induces CLN3 transcription in response to nutrient repletion to promote cell-cycle entry; cell cycle arrest phenotype of the cln1 cln2 cln3 triple null mutant…
NP14	D6	YKR097W	0.00196421	YKR097W	PCK1	Phosphoenolpyruvate CarboxyKinase	Phosphoenolpyruvate carboxykinase; key enzyme in gluconeogenesis, catalyzes early reaction in carbohydrate biosynthesis, glucose represses transcription and accelerates mRNA degradation, regulated by Mcm1p and Cat8p, located in the cytosol
NP15	E3	YPL092W	0.00194988	YPL092W	SSU1	Sensitive to SUlfite	Plasma membrane sulfite pump involved in sulfite metabolism; required for efficient sulfite efflux; major facilitator superfamily protein
NP1	B2	YML111W	0.00194562	YML111W	BUL2	Binds Ubiquitin Ligase	Component of the Rsp5p E3-ubiquitin ligase complex; involved in intracellular amino acid permease sorting, functions in heat shock element mediated gene expression, essential for growth in stress conditions; BUL2 has a paralog, BUL1, that arose from the whole genome duplication
NP24	C9	YDR171W	0.00194451	YDR171W	HSP42	Heat Shock Protein	Small heat shock protein (sHSP) with chaperone activity; forms barrel-shaped oligomers that suppress unfolded protein aggregation; involved in cytoskeleton reorganization after heat shock; protein abundance increases and forms cytoplasmic foci in response to DNA replication stress
NP14	D8	YKR103W	0.00194241	YKR103W	NFT1	New Full-length MRP-type Transporter	Putative transporter of the MRP subfamily; adjacent ORFs YKR103W and YKR104W are merged in different strain backgrounds; MRP stands for multidrug resistance-associated protein
NP14	D3	YKR090W	0.00193691	YKR090W	PXL1	PaXillin-Like protein	Protein that localizes to sites of polarized growth; required for selection and/or maintenance of polarized growth sites, may modulate signaling by the GTPases Cdc42p and Rho1p; contains LIM domains and has similarity to metazoan paxillin; relocalizes from bud neck to cytoplasm upon DNA replication stress
EP3	C5	YDR390C	0.00192998	YDR390C	UBA2	UBiquitin Activating	Subunit of heterodimeric nuclear SUMO activating enzyme E1 with Aos1p; activates Smt3p (SUMO) before its conjugation to proteins (sumoylation), which may play a role in protein targeting; essential for viability
NP37	G6	YDR319C	0.00192472	YDR319C	YFT2		Protein required for normal ER membrane biosynthesis; member of the highly conserved FIT family of proteins involved in triglyceride droplet biosynthesis and homologous to human FIT2; interacts with Sst2p and Hsp82p in high-throughput two-hybrid screens
NP13	G10	YPL193W	0.00191434	YPL193W	RSA1	RiboSome Assembly	Protein involved in the assembly of 60S ribosomal subunits; functionally interacts with Dbp6p; functions in a late nucleoplasmic step of the assembly
NP2	D2	YPL224C	0.00191245	YPL224C	MMT2	Mitochondrial Metal Transporter	Putative metal transporter involved in mitochondrial iron accumulation; MMT2 has a paralog, MMT1, that arose from the whole genome duplication
NP22	C4	YER158C	0.00191221	YER158C			Protein of unknown function; potentially phosphorylated by Cdc28p; YER158C has a paralog, AFR1, that arose from the whole genome duplication
NP44	F5	YGL196W	0.00190966	YGL196W	DSD1		D-serine dehydratase (aka D-serine ammonia-lyase); converts D-serine to pyruvate and ammonia by a reaction dependent on pyridoxal 5'-phosphate and zinc; may play a role in D-serine detoxification; L-serine is not a substrate
NP15	H1	YPL038W	0.00189567	YPL038W	MET31	METhionine requiring	Zinc-finger DNA-binding transcription factor; targets strong transcriptional activator Met4p to promoters of sulfur metabolic genes; involved in transcriptional regulation of the methionine biosynthetic genes; feedforward loop controlling expression of MET32 and the lack of such a loop for MET31 may account for the differential actions of Met31p and Met32p; MET31 has a paralog, MET32, that arose …
NP30	C2	YCL048W	0.00189012	YCL048W	SPS22	SPorulation Specific 2 too (2)	Protein of unknown function; SPS22 has a paralog, SPS2, that arose from the whole genome duplication; redundant with Sps2p for the organization of the beta-glucan layer of the spore wall
NP37	C7	YLL018C-A	0.00188053	YLL018C-A	COX19	Cytochrome c OXidase	Protein required for cytochrome c oxidase assembly; located in the cytosol and mitochondrial intermembrane space; putative copper metallochaperone that delivers copper to cytochrome c oxidase; contains twin cysteine-x9-cysteine motifs
NP21	A6	YAL007C	0.00187431	YAL007C	ERP2	Emp24p/Erv25p Related Protein	Member of the p24 family involved in ER to Golgi transport; similar to Emp24p and Erv25p; role in misfolded protein quality control; forms a heterotrimeric complex with Erp1p, Emp24p, and Erv25p; localized to COPII-coated vesicles; ERP2 has a paralog, ERP4, that arose from the whole genome duplication
NP23	C5	YFL010C	0.00187192	YFL010C	WWM1	WW domain containing protein interacting with Metacaspase	WW domain containing protein of unknown function; binds to Mca1p, a caspase-related protease that regulates H2O2-induced apoptosis; overexpression causes G1 phase growth arrest and clonal death that is suppressed by overexpression of MCA1
NP32	B8	YGR208W	0.00186939	YGR208W	SER2	SERine requiring	Phosphoserine phosphatase of the phosphoglycerate pathway; involved in serine and glycine biosynthesis, expression is regulated by the available nitrogen source
NP24	A12	YBR063C	0.00186776	YBR063C			Putative protein of unknown function; YBR063C is not an essential gene
NP20	D5	YBL064C	0.00186771	YBL064C	PRX1	PeroxiRedoXin	Mitochondrial peroxiredoxin with thioredoxin peroxidase activity; has a role in reduction of hydroperoxides; reactivation requires Trr2p and glutathione; induced during respiratory growth and oxidative stress; phosphorylated; protein abundance increases in response to DNA replication stress
NP21	C5	YMR072W	0.00186531	YMR072W	ABF2	ARS-Binding Factor	Mitochondrial DNA-binding protein; involved in mitochondrial DNA replication and recombination, member of HMG1 DNA-binding protein family; activity may be regulated by protein kinase A phosphorylation; ABF2 has a paralog, IXR1, that arose from the whole genome duplication; human homolog TFAM can complement yeast abf2 mutant, rescuing the loss-of-mitochondrial DNA phenotype in a yeast abf2 strain
NP21	B10	YMR063W	0.00185873	YMR063W	RIM9	Regulator of IME2	Plasma membrane protein of unknown function; involved in the proteolytic activation of Rim101p in response to alkaline pH; interacts with Rim21p and Dfg16p to form a pH-sensing complex in the Rim101 pathway and is required to maintain Rim21p levels; has similarity to A. nidulans PalI;
NP38	E7	YKR060W	0.00185335	YKR060W	UTP30	U Three Protein	Putative subunit of U3-containing 90S preribosome complex; complex is involved in production of 18S rRNA and assembly of small ribosomal subunit
NP19	D5	YGR112W	0.00184377	YGR112W	SHY1	SURF Homolog of Yeast	Mitochondrial inner membrane protein required for complex IV assembly; associates with complex IV assembly intermediates and complex III/complex IV supercomplexes; similar to human SURF1 involved in Leigh Syndrome; complex IV is also known as cytochrome c oxidase
NP33	A11	YLR087C	0.0018374	YLR087C	CSF1	Cold Sensitive for Fermentation	Protein required for fermentation at low temperature; plays a role in the maturation of secretory proteins; the authentic, non-tagged protein is detected in highly purified mitochondria in high-throughput studies
NP13	D12	YPL254W	0.00182947	YPL254W	HFI1	Histone H2A Functional Interactor	Adaptor protein required for structural integrity of the SAGA complex; a histone acetyltransferase-coactivator complex that is involved in global regulation of gene expression through acetylation and transcription functions
NP43	E9	YGL185C	0.00182533	YGL185C			Putative protein with sequence similar to hydroxyacid dehydrogenases; green fluorescent protein (GFP)-fusion protein localizes to the cytoplasm
NP37	H5	YER014C-A	0.00179882	YER014C-A	BUD25	BUD site selection	Protein involved in bud-site selection; diploid mutants display a random budding pattern instead of the wild-type bipolar pattern
NP19	C11	YGR101W	0.00179751	YGR101W	PCP1	Processing of Cytochrome c Peroxidase	Mitochondrial serine protease; required for the processing of various mitochondrial proteins and maintenance of mitochondrial DNA and morphology; belongs to the rhomboid-GlpG superfamily of intramembrane peptidases
NP36	A9	YNR034W	0.00179117	YNR034W	SOL1	Suppressor Of Los1-1	Protein with a possible role in tRNA export; shows similarity to 6-phosphogluconolactonase non-catalytic domains but does not exhibit this enzymatic activity; homologous to Sol3p and Sol4p; SOL1 has a paralog, SOL2, that arose from the whole genome duplication; protein abundance increases in response to DNA replication stress
NP46	G8	YOR227W	0.0017908	YOR227W	HER1	Hmg2p ER Remodeling	Protein of unknown function; required for proliferation or remodeling of the ER that is caused by overexpression of Hmg2p; may interact with ribosomes, based on co-purification experiments; HER1 has a paralog, GIP3, that arose from the whole genome duplication
NP3	A11	YCR059C	0.00177845	YCR059C	YIH1	Yeast Impact Homolog	Negative regulator of eIF2 kinase Gcn2p; competes with Gcn2p for binding to Gcn1p; may contribute to regulation of translation in response to starvation via regulation of Gcn2p; binds to monomeric actin and to ribosomes and polyribosomes; ortholog of mammalian IMPACT
EP5	H7	YIL126W	0.00177668	YIL126W	STH1	SNF Two Homolog	ATPase component of the RSC chromatin remodeling complex; required for expression of early meiotic genes; promotes base excision repair in chromatin; essential helicase-related protein homologous to Snf2p
NP37	A1	YML079W	0.00175463	YML079W			Non-essential protein of unknown function; has structural resemblance to plant storage and ligand binding proteins (canavalin, glycinin, auxin binding protein) and to some enzymes (epimerase, germin); localizes to the nucleus and cytoplasm
EP2	E11	YDR052C	0.00175017	YDR052C	DBF4	DumbBell Former	Regulatory subunit of Cdc7p-Dbf4p kinase complex; required for Cdc7p kinase activity and initiation of DNA replication; phosphorylates the Mcm2-7 family of proteins; cell cycle regulated; relative distribution to the nucleus increases upon DNA replication stress; co-expression of human CDC7 and DBF4 complements single cdc7 or dbf4 null mutations or the cdc7 dbf4 double null mutation
NP22	D7	YER179W	0.00173687	YER179W	DMC1	Disrupted Meiotic cDNA	Meiosis-specific recombinase required for double-strand break repair; also required for pairing between homologous chromosomes and for the normal morphogenesis of synaptonemal complex; binds ssDNA and dsDNA, forms helical filaments; potent inhibitor of the ATPase activity of Srs2p helicase, blocking its ssDNA translocating motor activity and inhibiting its antirecombinase activity; stimulated by …
NP19	C1	YGR071C	0.00172506	YGR071C	ENV11	late ENdosome and Vacuole interface function	Protein proposed to be involved in vacuolar functions; mutant shows defect in CPY processing and fragmented vacuoles; deletion mutant has increased glycogen accumulation and displays elongated buds; green fluorescent protein (GFP)-fusion protein localizes to the nucleus; ENV11 has a paralog, VID22, that arose from the whole genome duplication
NP20	B4	YBL024W	0.00172441	YBL024W	NCL1	NuCLear protein	S-adenosyl-L-methionine-dependent tRNA: m5C-methyltransferase; methylates cytosine to m5C at several positions in tRNAs and intron-containing pre-tRNAs; increases proportion of tRNALeu(CAA) with m5C at wobble position in response to hydrogen peroxide, causing selective translation of mRNA from genes enriched in TTG codon; loss of NCL1 confers hypersensitivity to oxidative stress; similar to Nop2p…
NP16	D10	YPR166C	0.00172366	YPR166C	MRP2	Mitochondrial Ribosomal Protein	Mitochondrial ribosomal protein of the small subunit
NP7	G7	YKL109W	0.00172217	YKL109W	HAP4	Heme Activator Protein	Transcription factor; subunit of the heme-activated, glucose-repressed Hap2p/3p/4p/5p CCAAT-binding complex, a transcriptional activator and global regulator of respiratory gene expression; provides the principal activation function of the complex; involved in diauxic shift
NP33	A10	YLR085C	0.00172022	YLR085C	ARP6	Actin-Related Protein	Actin-related protein that binds nucleosomes; a component of the SWR1 complex, which exchanges histone variant H2AZ (Htz1p) for chromatin-bound histone H2A
EP12	F9	YLR071C	0.00172003	YLR071C	RGR1	Resistant to Glucose Repression	Subunit of the RNA polymerase II mediator complex; associates with core polymerase subunits to form the RNA polymerase II holoenzyme; required for glucose repression, HO repression, RME1 repression and sporulation
NP20	E3	YBL081W	0.00171964	YBL081W			Non-essential protein of unknown function; null mutation results in a decrease in plasma membrane electron transport
NP14	E11	YLR452C	0.00171283	YLR452C	SST2	SuperSensiTive	GTPase-activating protein for Gpa1p; regulates desensitization to alpha factor pheromone; also required to prevent receptor-independent signaling of the mating pathway; member of the RGS (regulator of G-protein signaling) family
NP3	G7	YDR349C	0.00171076	YDR349C	YPS7	YaPSin	Putative GPI-anchored aspartic protease; member of the yapsin family of proteases involved in cell wall growth and maintenance; located in the cytoplasm and endoplasmic reticulum
NP24	H5	YGL049C	0.00169418	YGL049C	TIF4632	Translation Initiation Factor	Translation initiation factor eIF4G; subunit of the mRNA cap-binding protein complex (eIF4F) that also contains eIF4E (Cdc33p); associates with the poly(A)-binding protein Pab1p, also interacts with eIF4A (Tif1p); TIF4632 has a paralog, TIF4631, that arose from the whole genome duplication
NP19	D3	YGR108W	0.00168826	YGR108W	CLB1	CycLin B	B-type cyclin involved in cell cycle progression; activates Cdc28p to promote the transition from G2 to M phase; accumulates during G2 and M, then targeted via a destruction box motif for ubiquitin-mediated degradation by the proteasome; CLB1 has a paralog, CLB2, that arose from the whole genome duplication
NP33	D4	YLR341W	0.00168739	YLR341W	SPO77	SPOrulation	Meiosis-specific protein of unknown function; required for spore wall formation during sporulation and for timely prospore membrane closure along with SPS1; required with Sps1p for phosphorylation and turnover of Ssp1p; dispensable for both nuclear divisions during meiosis
NP37	A9	YML057W	0.00168505	YML057W	CMP2	CalModulin binding Protein	Calcineurin A; one isoform (the other is Cna1p) of the catalytic subunit of calcineurin, a Ca++/calmodulin-regulated protein phosphatase which regulates Crz1p (a stress-response transcription factor), the other calcineurin subunit is CNB1; regulates the function of Aly1p alpha-arrestin; CMP2 has a paralog, CNA1, that arose from the whole genome duplication
NP35	G5	YNL044W	0.00167867	YNL044W	YIP3	Ypt-Interacting Protein	Protein localized to COPII vesicles; proposed to be involved in ER to Golgi transport; interacts with members of the Rab GTPase family and Yip1p; also interacts with Rtn1p
NP24	E2	YDR204W	0.0016749	YDR204W	COQ4	COenzyme Q	Protein with a role in ubiquinone (Coenzyme Q) biosynthesis; possibly functioning in stabilization of Coq7p; located on matrix face of mitochondrial inner membrane; component of a mitochondrial ubiquinone-synthesizing complex; human homolog COQ4 can complement yeast coq4 null mutant
NP20	E7	YBL089W	0.00167117	YBL089W	AVT5	Amino acid Vacuolar Transport	Putative transporter; member of a family of seven S. cerevisiae genes (AVT1-7) related to vesicular GABA-glycine transporters; AVT5 has a paralog, AVT6, that arose from the whole genome duplication
EP7	B3	YKL182W	0.00167073	YKL182W	FAS1	Fatty Acid Synthetase	Beta subunit of fatty acid synthetase; complex catalyzes the synthesis of long-chain saturated fatty acids; contains acetyltransacylase, dehydratase, enoyl reductase, malonyl transacylase, and palmitoyl transacylase activities
NP2	F8	YDR286C	0.00166742	YDR286C	MGP12	Mitochondrial Glutaredoxin-like Protein of 12 kDa	Putative protein of unknown function; predicted to have thiol-disulfide oxidoreductase active site
NP46	F6	YPL271W	0.00166098	YPL271W	ATP15	ATP synthase	Epsilon subunit of the F1 sector of mitochondrial F1F0 ATP synthase; which is a large, evolutionarily conserved enzyme complex required for ATP synthesis; F1 translationally regulates ATP6 and ATP8 expression to achieve a balanced output of ATP synthase genes encoded in nucleus and mitochondria; phosphorylated
NP41	D6	YCL001W	0.00165941	YCL001W	RER1	Retention in the Endoplasmic Reticulum	Protein involved in retention of membrane proteins; including Sec12p, in the ER; localized to Golgi; functions as a retrieval receptor in returning membrane proteins to the ER
EP3	A7	YDR292C	0.00164443	YDR292C	SRP101	Signal Recognition Particle	Signal recognition particle (SRP) receptor alpha subunit; contain GTPase domains; involved in SRP-dependent protein targeting; interacts with the beta subunit, Srp102p
NP5	D11	YIL139C	0.00163985	YIL139C	REV7	REVersionless	Accessory subunit of DNA polymerase zeta; involved in translesion synthesis during post-replication repair; required for mutagenesis induced by DNA damage; involved in double-strand break repair; forms a complex with Rev3p, Pol31p and Pol32p
NP38	C8	YJL170C	0.00163702	YJL170C	ASG7	a-Specific Gene	Protein that regulates signaling from G protein beta subunit Ste4p; contributes to relocalization of Ste4p within the cell; specific to a-cells and induced by alpha-factor
NP41	F8	YAL012W	0.00163596	YAL012W	CYS3	CYStathionine gamma-lyase	Cystathionine gamma-lyase; catalyzes one of the two reactions involved in the transsulfuration pathway that yields cysteine from homocysteine with the intermediary formation of cystathionine; protein abundance increases in response to DNA replication stress
NP41	D5	YBR262C	0.00163363	YBR262C	MIC12	MItochondrial contact site and Cristae organizing system	Component of the MICOS complex; MICOS (formerly MINOS or MitOS) is a mitochondrial inner membrane complex that extends into the intermembrane space and has a role in the maintenance of crista junctions, inner membrane architecture, and formation of contact sites to the outer membrane; forms a subcomplex with Mic10p and Mic27p whose assembly and stability requires cardiolipin
NP23	C10	YGR252W	0.00163344	YGR252W	GCN5	General Control Nonderepressible	Catalytic subunit of ADA and SAGA histone acetyltransferase complexes; modifies N-terminal lysines on histones H2B and H3; acetylates Rsc4p, a subunit of the RSC chromatin-remodeling complex, altering replication stress tolerance; relocalizes to the cytosol in response to hypoxia; mutant displays reduced transcription elongation in the G-less-based run-on (GLRO) assay; greater involvement in repr…
NP19	D6	YGR118W	0.00162951	YGR118W	RPS23A	Ribosomal Protein of the Small subunit	Ribosomal protein 28 (rp28) of the small (40S) ribosomal subunit; required for translational accuracy; homologous to mammalian ribosomal protein S23 and bacterial S12; RPS23A has a paralog, RPS23B, that arose from the whole genome duplication; deletion of both RPS23A and RPS23B is lethal
NP29	B5	YGR023W	0.0016273	YGR023W	MTL1	Mid-Two Like	Putative plasma membrane sensor; involved in cell integrity signaling and stress response during glucose starvation and oxidative stress; has structural and functional similarity to Mid2p; MTL1 has a paralog, MID2, that arose from the whole genome duplication
NP19	C4	YGR078C	0.00162649	YGR078C	PAC10	Perish in the Absence of Cin8p	Part of the heteromeric co-chaperone GimC/prefoldin complex; complex promotes efficient protein folding
NP23	E7	YOR274W	0.00162485	YOR274W	MOD5	tRNA MODification	Delta 2-isopentenyl pyrophosphate:tRNA isopentenyl transferase; required for biosynthesis of isopentenyladenosine in mitochondrial and cytoplasmic tRNAs; also has a role in tRNA gene-mediated silencing; gene encodes two isozymic forms; converts to a prion form, prion conversion contributes to azole antifungal resistance by upregulating ergosterol biosynthesis; homolog of human TRIT1, a mutation i…
NP19	G3	YJL060W	0.00160682	YJL060W	BNA3	Biosynthesis of Nicotinic Acid	Kynurenine aminotransferase; catalyzes formation of kynurenic acid from kynurenine; potential Cdc28p substrate
NP23	C1	YDR506C	0.00160259	YDR506C	GMC1	Grand Meiotic recombination Cluster	Protein involved in meiotic progression; mutants are delayed in meiotic nuclear division and are defective in synaptonemal complex assembly; possible membrane-localized protein; SWAT-GFP and mCherry fusion proteins localize to the endoplasmic reticulum and vacuole respectively
NP41	B10	YML053C	0.00160032	YML053C			Putative protein of unknown function; green fluorescent protein (GFP)-fusion protein localizes to the cytoplasm and the nucleus; overexpression causes a cell cycle delay or arrest; YML053C is not an essential gene
EP12	G11	YNL251C	0.0015983	YNL251C	NRD1	Nuclear pre-mRNA Down-regulation	RNA-binding subunit of Nrd1 complex; complex interacts with exosome to mediate 3'-end formation of some mRNAs, snRNAs, snoRNAs, and CUTs; interacts with CTD of RNA pol II large subunit Rpo21p at phosphorylated Ser5 to direct transcription termination of non-polyadenylated transcripts; H3K4 trimethylation of transcribed regions by Set1p enhances recruitment of Nrd1p to those sites; role in regulat…
NP38	A6	YGL025C	0.00158718	YGL025C	PGD1	PolyGlutamine Domain	Subunit of the RNA polymerase II mediator complex; associates with core polymerase subunits to form the RNA polymerase II holoenzyme; essential for basal and activated transcription; direct target of Cyc8p-Tup1p transcriptional corepressor
NP24	F6	YDR237W	0.00158356	YDR237W	MRPL7	Mitochondrial Ribosomal Protein, Large subunit	Mitochondrial ribosomal protein of the large subunit; MRPL7 produces both YmL5 and YmL7, which are two different modified forms of the same protein
NP32	F7	YLR012C	0.00157641	YLR012C			Putative protein of unknown function; YLR012C is not an essential gene
NP16	G12	YJR049C	0.00157375	YJR049C	UTR1	Unidentified TRanscript	ATP-NADH kinase; phosphorylates both NAD and NADH; active as a hexamer; enhances the activity of ferric reductase (Fre1p); UTR1 has a paralog, YEF1, that arose from the whole genome duplication
NP20	C3	YBL039C	0.00156964	YBL039C	URA7	URAcil requiring	Major CTP synthase isozyme (see also URA8); catalyzes the ATP-dependent transfer of the amide nitrogen from glutamine to UTP, forming CTP, the final step in de novo biosynthesis of pyrimidines; involved in phospholipid biosynthesis; capable of forming cytoplasmic filaments termed cytoophidium, especially during conditions of glucose depletion; URA7 has a paralog, URA8, that arose from the whole g…
NP35	B1	YNL195C	0.00156837	YNL195C			Protein of unknown function; shares a promoter with YNL194C; the authentic, non-tagged protein is detected in highly purified mitochondria in high-throughput studies; YNL195C has a paralog, HBT1, that arose from the whole genome duplication
NP21	A3	YAL010C	0.00156566	YAL010C	MDM10	Mitochondrial Distribution and Morphology	Subunit of both the ERMES and the SAM complex; component of ERMES complex which acts as a molecular tether between the mitochondria and the ER, necessary for efficient phospholipid exchange between organelles and for mitophagy; SAM/TOB complex component that functions in the assembly of outer membrane beta-barrel proteins; involved in mitochondrial inheritance and morphology; ERMES complex is oft…
NP24	D3	YDR181C	0.00156303	YDR181C	SAS4	Something About Silencing	Subunit of the SAS complex (Sas2p, Sas4p, Sas5p); acetylates free histones and nucleosomes and regulates transcriptional silencing; required for the HAT activity of Sas2p
NP15	D3	YPL110C	0.00154532	YPL110C	GDE1	GlycerophosphoDiEsterase	Glycerophosphocholine (GroPCho) phosphodiesterase; hydrolyzes GroPCho to choline and glycerolphosphate, for use as a phosphate source and as a precursor for phosphocholine synthesis; may interact with ribosomes
EP11	E8	YPR162C	0.00154118	YPR162C	ORC4	Origin Recognition Complex	Subunit of the origin recognition complex (ORC); ORC directs DNA replication by binding to replication origins and is also involved in transcriptional silencing; ORC4 has a paralog, RIF2, that arose from the whole genome duplication
NP20	G10	YAL031C	0.00153769	YAL031C	GIP4	Glc7 Interacting Protein	Cytoplasmic protein that regulates protein phosphatase 1 Glc7p; protein overexpression relocalizes Glc7p from the nucleus and prevents chromosome segregation; potential Cdc28p substrate
NP24	F3	YDR231C	0.00153182	YDR231C	COX20	Cytochrome c OXidase	Mitochondrial inner membrane protein; required for proteolytic processing of Cox2p and its assembly into cytochrome c oxidase
NP5	F3	YIL165C	0.0015317	YIL165C			Putative protein of unknown function; mutant exhibits mitophagy defects; in closely related species and other S. cerevisiae strain backgrounds YIL165C and adjacent ORF, YIL164C, likely constitute a single ORF encoding a nitrilase gene
NP19	A2	YER011W	0.00152478	YER011W	TIR1	TIp1-Related	Cell wall mannoprotein; expression is downregulated at acidic pH and induced by cold shock and anaerobiosis; abundance is increased in cells cultured without shaking; member of the Srp1p/Tip1p family of serine-alanine-rich proteins
NP18	C7	YNL073W	0.00151797	YNL073W	MSK1	Mitochondrial aminoacyl-tRNA Synthetase, lysine (K)	Mitochondrial lysine-tRNA synthetase; required for import of both aminoacylated and deacylated forms of tRNA(Lys) into mitochondria and for aminoacylation of mitochondrially encoded tRNA(Lys)
NP19	F6	YJL079C	0.00151535	YJL079C	PRY1	Pathogen Related in Yeast	Sterol binding protein involved in the export of acetylated sterols; secreted glycoprotein and member of the CAP protein superfamily (cysteine-rich secretory proteins (CRISP), antigen 5, and pathogenesis related 1 proteins); sterol export function is redundant with that of PRY2; may be involved in detoxification of hydrophobic compounds; PRY1 has a paralog, PRY2, that arose from the whole genome …
NP23	B12	YDR502C	0.00151065	YDR502C	SAM2	S-AdenosylMethionine requiring	S-adenosylmethionine synthetase; catalyzes transfer of the adenosyl group of ATP to the sulfur atom of methionine; comparative analysis suggests that a mitochondrially targeted form may result from translation starting at a non-canonical codon upstream of the annotated start codon
NP6	C10	YDR100W	0.00150486	YDR100W	TVP15	Tlg2-Vesicle Protein	Integral membrane protein; localized to late Golgi vesicles along with the v-SNARE Tlg2p
NP20	D2	YBL059W	0.00150261	YBL059W	IAI11	Interactor of AIm11	Putative protein of unknown function; the authentic, non-tagged protein is detected in highly purified mitochondria in high-throughput studies; YBL059W has a paralog, YER093C-A, that arose from the whole genome duplication
NP32	A11	YGR194C	0.00150048	YGR194C	XKS1	XyluloKinaSe	Xylulokinase; converts D-xylulose and ATP to xylulose 5-phosphate and ADP; rate limiting step in fermentation of xylulose; required for xylose fermentation by recombinant S. cerevisiae strains
NP20	C10	YBL054W	0.00149647	YBL054W	TOD6	Twin Of Dot6p	PAC motif binding protein involved in rRNA and ribosome biogenesis; subunit of the RPD3L histone deacetylase complex; Myb-like HTH transcription factor; hypophosphorylated by rapamycin treatment in a Sch9p-dependent manner; activated in stochastic pulses of nuclear localization
NP46	H7	YOR365C	0.00148655	YOR365C			Putative protein of unknown function; not an essential protein; YOR365C has a paralog, FLC2, that arose from the whole genome duplication
NP38	D8	YKL127W	0.00148557	YKL127W	PGM1	PhosphoGlucoMutase	Phosphoglucomutase, minor isoform; catalyzes the conversion from glucose-1-phosphate to glucose-6-phosphate, which is a key step in hexose metabolism; PGM1 has a paralog, PGM2, that arose from the whole genome duplication
NP33	B4	YLR094C	0.00148181	YLR094C	GIS3	GIg1-2 Suppressor	Protein of unknown function
NP16	C11	YPR149W	0.00148087	YPR149W	NCE102	NonClassical Export	Protein of unknown function; contains transmembrane domains; involved in secretion of proteins that lack classical secretory signal sequences; component of the detergent-insoluble glycolipid-enriched complexes (DIGs); NCE102 has a paralog, FHN1, that arose from the whole genome duplication
NP24	D9	YDR194C	0.00147891	YDR194C	MSS116	Mitochondrial Splicing System	Mitochondrial transcription elongation factor; DEAD-box protein; required for efficient splicing of mitochondrial Group I and II introns; non-polar RNA helicase that also facilities strand annealing; promotes RNA folding by stabilizing an early assembly intermediate
NP37	B11	YCR091W	0.00147425	YCR091W	KIN82	protein KINase	Putative serine/threonine protein kinase; implicated in the regulation of phospholipid asymmetry through the activation of phospholipid translocases (flippases); involved in the phosphorylation of upstream inhibitory kinase Ypk1p along with Fpk1p; has a redundant role in the cellular response to mating pheromone; KIN82 has a paralog, FPK1, that arose from the whole genome duplication
NP20	E1	YBL079W	0.00147379	YBL079W	NUP170	NUclear Pore	Subunit of inner ring of nuclear pore complex (NPC); contributes to NPC assembly and nucleocytoplasmic transport; interacts with genomic regions that contain ribosomal protein and subtelomeric genes, where it functions in nucleosome positioning and as a repressor of transcription; both Nup170p and NUP157p are similar to human Nup155p; NUP170 has a paralog, NUP157, that arose from the whole genome…
NP20	D8	YBL068W	0.00147163	YBL068W	PRS4	PhosphoRibosylpyrophosphate Synthetase	5-phospho-ribosyl-1(alpha)-pyrophosphate synthetase, synthesizes PRPP; which is required for nucleotide, histidine, and tryptophan biosynthesis; one of five related enzymes, which are active as heteromultimeric complexes; PRS4 has a paralog, PRS2, that arose from the whole genome duplication; a missense mutation in the conserved residue R196 of its human homolog PRPS1 is pathogenic
NP38	C10	YJL107C	0.00147101	YJL107C			Putative protein of unknown function; expression is induced by activation of the HOG1 mitogen-activated signaling pathway and this induction is Hog1p/Pbs2p dependent; YJL107C and adjacent ORF, YJL108C are merged in related fungi
NP41	H7	YOR026W	0.00147049	YOR026W	BUB3	Budding Uninhibited by Benzimidazole	Kinetochore checkpoint WD40 repeat protein; localizes to kinetochores during prophase and metaphase, delays anaphase in the presence of unattached kinetochores; forms complexes with Mad1p-Bub1p and with Cdc20p, binds Mad2p and Mad3p; functions at kinetochore to activate APC/C-Cdc20p for normal mitotic progression
NP24	C12	YDR178W	0.00146106	YDR178W	SDH4	Succinate DeHydrogenase	Membrane anchor subunit of succinate dehydrogenase (SDH); involved in coupling the oxidation of succinate to the transfer of electrons to ubiquinone as part of the TCA cycle and the mitochondrial respiratory chain; has similarity to human SDH subunit D (SDHD), which is implicated in paraganglioma
NP41	H11	YBR189W	0.00145954	YBR189W	RPS9B	Ribosomal Protein of the Small subunit	Protein component of the small (40S) ribosomal subunit; homologous to mammalian ribosomal protein S9 and bacterial S4; RPS9B has a paralog, RPS9A, that arose from the whole genome duplication
NP41	E3	YKR101W	0.00145521	YKR101W	SIR1	Silent Information Regulator	Protein involved in silencing at mating-type loci HML and HMR; recruitment to silent chromatin requires interactions with Orc1p and with Sir4p, through a common Sir1p domain; binds to centromeric chromatin
NP33	B1	YLR091W	0.00145386	YLR091W	GEP5	GEnetic interactors of Prohibitins	Protein of unknown function; required for efficient 5' processing of mitochondrial tRNAs, for respiratory growth and mitochondrial genome maintenance; null mutant has decreased levels of cardiolipin and phosphatidylethanolamine; localizes to the matrix side of the inner mitochondrial membrane
NP25	C9	YGL135W	0.00145284	YGL135W	RPL1B	Ribosomal Protein of the Large subunit	Ribosomal 60S subunit protein L1B; N-terminally acetylated; homologous to mammalian ribosomal protein L10A and bacterial L1; RPL1B has a paralog, RPL1A, that arose from the whole genome duplication; rpl1a rpl1b double null mutation is lethal
EP9	A8	YNL006W	0.00145265	YNL006W	LST8	Lethal with Sec Thirteen	Protein required for the transport of Gap1p; required for the transport of amino acid permease Gap1p from the Golgi to the cell surface; component of the TOR signaling pathway; associates with both Tor1p and Tor2p; contains a WD-repeat
NP5	B7	YIL085C	0.00144961	YIL085C	KTR7	Kre Two Related	Putative mannosyltransferase involved in protein glycosylation; member of the KRE2/MNT1 mannosyltransferase family; KTR7 has a paralog, KTR5, that arose from the whole genome duplication
NP16	A6	YPL003W	0.00144866	YPL003W	ULA1	Ubiquitin-Like protein Activation	Protein that activates Rub1p (NEDD8) before neddylation; acts together with Uba3p; may play a role in protein degradation
NP41	B9	YJL004C	0.00144539	YJL004C	SYS1	Suppressor of Ypt Six	Integral membrane protein of the Golgi; required for targeting of the Arf-like GTPase Arl3p to the Golgi; multicopy suppressor of ypt6 null mutation
NP21	H7	YER109C	0.001443	YER109C	FLO8	FLOcculation	Transcription factor; required for flocculation, diploid filamentous growth, and haploid invasive growth; forms a heterodimer with Mss1p that interacts with the Swi/Snf complex during transcriptional activation of FLO1, FLO11, and STA1; S. cerevisiae genome reference strain S288C contains an internal in-frame stop at codon 142, which in other strains encodes tryptophan
NP38	F4	YLR064W	0.0014398	YLR064W	PER33	Pore and ER protein, 33 kDa	Protein that localizes to the endoplasmic reticulum; also associates with the nuclear pore complex; deletion extends chronological lifespan; highly conserved across species, orthologous to human TMEM33 and paralogous to Pom33p; protein abundance increases in response to DNA replication stress
NP41	F7	YML042W	0.00143973	YML042W	CAT2	Carnitine AcetylTransferase	Carnitine acetyl-CoA transferase; present in both mitochondria and peroxisomes; transfers activated acetyl groups to carnitine to form acetylcarnitine which can be shuttled across membranes
NP24	C2	YDR152W	0.00143637	YDR152W	GIR2	Genetically Interacts with Ribosomal genes	Highly-acidic RWD domain-containing cytoplasmic protein; forms a highly conserved complex with Rbg2p that is responsible for efficient cell growth under amino acid starvation and binds translational activator Gcn1p in dose-dependent manner according to stress level; associates with translating ribosomes; intrinsically unstructured protein whose stability is enhanced upon binding Rbg2p
NP18	A9	YBR301W	0.00143169	YBR301W	PAU24	seriPAUperin family	Cell wall mannoprotein; has similarity to Tir1p, Tir2p, Tir3p, and Tir4p; member of the seripauperin multigene family encoded mainly in subtelomeric regions; expressed under anaerobic conditions, completely repressed during aerobic growth
NP46	G7	YOR222W	0.00142892	YOR222W	ODC2	OxoDicarboxylate Carrier	Mitochondrial inner membrane transporter; 2-oxodicarboxylate transporter, exports 2-oxoadipate and 2-oxoglutarate from the mitochondrial matrix to the cytosol for use in lysine and glutamate biosynthesis and in lysine catabolism; ODC2 has a paralog, ODC1, that arose from the whole genome duplication
NP20	B8	YBL029W	0.00142642	YBL029W			Non-essential protein of unknown function
NP19	D9	YJL127C	0.00141886	YJL127C	SPT10	SuPpressor of Ty	Histone H3 acetylase with a role in transcriptional regulation; sequence-specific activator of histone genes, binds specifically and cooperatively to pairs of UAS elements in core histone promoters, functions at or near TATA box; involved in S phase-specific acetylation of H3K56 at histone promoters, which is required for recruitment of SWI/SNF nucleosome remodeling complex and subsequent transcr…
NP36	C1	YOR213C	0.00141804	YOR213C	SAS5	Something About Silencing	Subunit of the SAS complex (Sas2p, Sas4p, Sas5p); acetylates free histones and nucleosomes and regulates transcriptional silencing; stimulates Sas2p HAT activity
NP2	G6	YDR305C	0.00141784	YDR305C	HNT2	Histidine triad NucleoTide-binding	Dinucleoside triphosphate hydrolase; has similarity to the tumor suppressor FHIT and belongs to the histidine triad (HIT) superfamily of nucleotide-binding proteins
NP33	A8	YLR082C	0.00141584	YLR082C	SRL2	Suppressor of Rad53 null Lethality	Protein of unknown function; overexpression suppresses the lethality caused by a rad53 null mutation
NP22	D12	YER185W	0.001414	YER185W	PUG1	Protoporphyrin Uptake Gene	Plasma membrane protein involved in protoprophyrin and heme transport; roles in the uptake of protoprophyrin IX and the efflux of heme; expression is induced under both low-heme and low-oxygen conditions; member of the fungal lipid-translocating exporter (LTE) family of proteins
NP43	D5	YER076C	0.00141198	YER076C			Putative protein of unknown function; the authentic, non-tagged protein is detected in highly purified mitochondria in high-throughput studies; analysis of HA-tagged protein suggests a membrane localization
NP20	C8	YBL049W	0.00141109	YBL049W	MOH1		Protein of unknown function, essential for stationary phase survival; not required for growth on nonfermentable carbon sources; possibly linked with vacuolar transport
NP24	D6	YDR186C	0.00140999	YDR186C	SND1	Srp-iNDependent targeting	Protein involved in SRP-independent targeting of substrates to the ER; component of an alternative ER targeting pathway that has partial functional redundancy with the GET pathway; preference for substrates with downstream transmembrane domains; interacts with Env10p/Snd2p and Pho88p/Snd3p; can compensate for loss of SRP; may interact with ribosomes, based on co-purification experiments; GFP-fusi…
NP35	B5	YNL190W	0.00140251	YNL190W			Hydrophilin essential in desiccation-rehydration process; cell wall protein; contains a putative GPI-attachment site
EP3	F3	YEL058W	0.00140229	YEL058W	PCM1	PhosphoaCetylglucosamine Mutase	Essential N-acetylglucosamine-phosphate mutase; converts GlcNAc-6-P to GlcNAc-1-P, which is a precursor for the biosynthesis of chitin and for the formation of N-glycosylated mannoproteins and glycosylphosphatidylinositol anchors
NP23	D10	YJR003C	0.00139987	YJR003C	MRX12	Mitochondrial oRganization of gene eXpression (MIOREX)	Protein that associates with mitochondrial ribosome; detected in highly purified mitochondria in high-throughput studies; predicted to be involved in ribosome biogenesis
NP46	H2	YOR305W	0.00139943	YOR305W	RRG7	Required for Respiratory Growth	Protein of unknown function; green fluorescent protein (GFP)-fusion protein localizes to the mitochondrion; deletion confers sensitivity to 4-(N-(S-glutathionylacetyl)amino) phenylarsenoxide (GSAO); YOR305W is not an essential gene
NP41	G4	YJR125C	0.00139884	YJR125C	ENT3	Epsin N-Terminal homology	Protein containing an N-terminal epsin-like domain; involved in clathrin recruitment and traffic between the Golgi and endosomes; associates with the clathrin adaptor Gga2p
NP38	H8	YNL286W	0.0013983	YNL286W	CUS2	Cold sensitive U2 snRNA Suppressor	Putative checkpoint factor in transcription; binds to U2 snRNA and Prp11p; regulates toggling of the U2 snRNA stem II region between different structures; contains two RNA recognition motifs (RRMs)
NP34	A2	YMR266W	0.00139411	YMR266W	RSN1	Rescue of Sro7 at high Nacl	Membrane protein of unknown function; overexpression suppresses NaCl sensitivity of sro7 mutant cells by restoring sodium pump (Ena1p) localization to the plasma membrane
NP4	E5	YHR203C	0.00139276	YHR203C	RPS4B	Ribosomal Protein of the Small subunit	Protein component of the small (40S) ribosomal subunit; homologous to mammalian ribosomal protein S4, no bacterial homolog; RPS4B has a paralog, RPS4A, that arose from the whole genome duplication
NP16	H9	YJR061W	0.00138683	YJR061W	MNN14	MaNNosyltransferase regulator	Putative protein of unknown function; non-essential gene; transcription repressed by Rm101p; YJR061W has a paralog, MNN4, that arose from the whole genome duplication
NP23	B11	YDR500C	0.00138429	YDR500C	RPL37B	Ribosomal Protein of the Large subunit	Ribosomal 60S subunit protein L37B; required for processing of 27SB pre-rRNA and formation of stable 66S assembly intermediates; protein abundance increases in response to DNA replication stress; homologous to mammalian ribosomal protein L37, no bacterial homolog; RPL37B has a paralog, RPL37A, that arose from the whole genome duplication
EP3	B10	YDR361C	0.00138229	YDR361C	BCP1		Essential protein involved in nuclear export of Mss4p; Mss4p is a lipid kinase that generates phosphatidylinositol 4,5-biphosphate and plays a role in actin cytoskeleton organization and vesicular transport
NP37	B5	YCR031C	0.00138145	YCR031C	RPS14A	Ribosomal Protein of the Small subunit	Protein component of the small (40S) ribosomal subunit; required for ribosome assembly and 20S pre-rRNA processing; mutations confer cryptopleurine resistance; homologous to mammalian ribosomal protein S14 and bacterial S11; RPS14A has a paralog, RPS14B, that arose from the whole genome duplication
NP20	A8	YBL010C	0.00137863	YBL010C			Putative protein of unknown function; green fluorescent protein (GFP)-fusion protein colocalizes with clathrin-coated vesicles
NP29	E8	YBR094W	0.00137852	YBR094W	PBY1	P-BodY associated protein	Putative tubulin tyrosine ligase associated with P-bodies; may have a role in mRNA metabolism; yeast knockout collection strain identified as a pby1 null mutant is actually wild-type for PBY1 and deleted for mms4
EP3	H3	YER133W	0.00137839	YER133W	GLC7	GLyCogen	Type 1 S/T protein phosphatase (PP1) catalytic subunit; involved in glycogen metabolism, sporulation and mitotic progression; interacts with multiple regulatory subunits; regulates actomyosin ring formation; subunit of CPF; recruited to mating projections by Afr1p interaction; regulates nucleocytoplasmic shuttling of Hxk2p; import into the nucleus is inhibited during spindle assembly checkpoint a…
NP21	D6	YMR090W	0.00137829	YMR090W			Putative protein of unknown function; similar to DTDP-glucose 4,6-dehydratases; GFP-fusion protein localizes to the cytoplasm; up-regulated in response to the fungicide mancozeb; not essential for viability
NP41	C3	YJR062C	0.00137772	YJR062C	NTA1	N-Terminal Amidase	Amidase; removes the amide group from N-terminal asparagine and glutamine residues to generate proteins with N-terminal aspartate and glutamate residues that are targets of ubiquitin-mediated degradation
NP21	G11	YOL132W	0.00137648	YOL132W	GAS4	Glycophospholipid-Anchored Surface protein	1,3-beta-glucanosyltransferase; involved with Gas2p in spore wall assembly; has similarity to Gas1p; localizes to the cell wall
NP19	C6	YGR084C	0.00137008	YGR084C	MRP13	Mitochondrial Ribosomal Protein	Mitochondrial ribosomal protein of the small subunit
NP41	A9	YPR071W	0.00136815	YPR071W			Putative membrane protein; YPR071W is not an essential gene; YPR071W has a paralog, YIL029C, that arose from a single-locus duplication
NP24	A3	YBR052C	0.00136662	YBR052C	RFS1	Rad55 (Fifty-five) Suppressor	Protein of unknown function; member of a flavodoxin-like fold protein family that includes Pst2p and Ycp4p; green fluorescent protein (GFP)-fusion protein localizes to the cytoplasm in a punctate pattern; RFS1 has a paralog, PST2, that arose from the whole genome duplication
NP24	B11	YDR148C	0.00136628	YDR148C	KGD2	alpha-KetoGlutarate Dehydrogenase	Dihydrolipoyl transsuccinylase; component of the mitochondrial alpha-ketoglutarate dehydrogenase complex, which catalyzes the oxidative decarboxylation of alpha-ketoglutarate to succinyl-CoA in the TCA cycle; phosphorylated
NP15	B1	YPL154C	0.00136267	YPL154C	PEP4	carboxyPEPtidase Y-deficient	Vacuolar aspartyl protease (proteinase A); required for posttranslational precursor maturation of vacuolar proteinases; important for protein turnover after oxidative damage; plays a protective role in acetic acid induced apoptosis; synthesized as a zymogen, self-activates
NP19	F4	YJL083W	0.00136238	YJL083W	TAX4		EH domain-containing protein; involved in regulating phosphatidylinositol 4,5-bisphosphate levels and autophagy; Irs4p and Tax4p bind and activate the PtdIns phosphatase Inp51p; Irs4p and Tax4p are involved in localizing Atg17p to the PAS; TAX4 has a paralog, IRS4, that arose from the whole genome duplication
NP10	G4	YOR113W	0.00136092	YOR113W	AZF1	Asparagine-rich Zinc-Finger	Zinc-finger transcription factor; involved in diauxic shift; in the presence of glucose, activates transcription of genes involved in growth and carbon metabolism; in nonfermentable carbon sources, activates transcription of genes involved in maintenance of cell wall integrity; relocalizes to the cytosol in response to hypoxia
NP34	C11	YMR303C	0.00136038	YMR303C	ADH2	Alcohol DeHydrogenase	Glucose-repressible alcohol dehydrogenase II; catalyzes the conversion of ethanol to acetaldehyde; involved in the production of certain carboxylate esters; regulated by ADR1
NP41	A2	YOR386W	0.00135837	YOR386W	PHR1	PHotoreactivation Repair deficient	DNA photolyase involved in photoreactivation; repairs pyrimidine dimers in the presence of visible light; induced by DNA damage; regulated by transcriptional repressor Rph1p
NP22	E4	YMR053C	0.0013568	YMR053C	STB2	Sin Three Binding protein	Protein that interacts with Sin3p in a two-hybrid assay; part of a large protein complex with Sin3p and Stb1p; STB2 has a paralog, STB6, that arose from the whole genome duplication
NP37	F12	YDR144C	0.00135469	YDR144C	MKC7	Multicopy suppressor of Kex2 Cold sensitivity	GPI-anchored aspartyl protease; member of the yapsin family of proteases involved in cell wall growth and maintenance; shares functions with Yap3p and Kex2p; MKC7 has a paralog, YPS1, that arose from the whole genome duplication
NP22	G7	YFR034C	0.00135031	YFR034C	PHO4	PHOsphate metabolism	Basic helix-loop-helix (bHLH) transcription factor of the myc-family; activates transcription cooperatively with Pho2p in response to phosphate limitation; binding to 'CACGTG' motif is regulated by chromatin restriction, competitive binding of Cbf1p to the same DNA binding motif and cooperation with Pho2p; function is regulated by phosphorylation at multiple sites and by phosphate availability
NP37	A2	YML078W	0.00134835	YML078W	CPR3	Cyclosporin A-sensitive Proline Rotamase	Mitochondrial peptidyl-prolyl cis-trans isomerase (cyclophilin); catalyzes the cis-trans isomerization of peptide bonds N-terminal to proline residues; involved in protein refolding after import into mitochondria
NP34	H3	YNL233W	0.00134757	YNL233W	BNI4	Bud Neck Involved	Targeting subunit for Glc7p protein phosphatase; localized to the bud neck, required for localization of chitin synthase III to the bud neck via interaction with the chitin synthase III regulatory subunit Skt5p; phosphorylation by Slt2p and Kss1p involved in regulating Bni4p in septum assembly
NP16	C10	YPR148C	0.00134671	YPR148C			Protein of unknown function; may interact with ribosomes, based on co-purification experiments; green fluorescent protein (GFP)-fusion protein localizes to the cytoplasm in a punctate pattern
NP41	B3	YJR148W	0.00134301	YJR148W	BAT2	Branched-chain Amino acid Transaminase	Cytosolic branched-chain amino acid (BCAA) aminotransferase; preferentially involved in BCAA catabolism; homolog of murine ECA39; highly expressed during stationary phase and repressed during logarithmic phase; BAT2 has a paralog, BAT1, that arose from the whole genome duplication
NP13	A9	YOL047C	0.00134283	YOL047C	LDS2	Lipid Droplets in Sporulation	Protein Involved in spore wall assembly; localizes to lipid droplets found on or outside of the prospore membrane; shares similarity with Lds1p and Rrt8p, and a strain mutant for all 3 genes exhibits reduced dityrosine fluorescence relative to the single mutants; green fluorescent protein (GFP)-fusion protein localizes to the cytoplasm in a punctate pattern
NP39	B1	YOL061W	0.00134105	YOL061W	PRS5	PhosphoRibosylpyrophosphate Synthetase	5-phospho-ribosyl-1(alpha)-pyrophosphate synthetase; synthesizes PRPP, which is required for nucleotide, histidine, and tryptophan biosynthesis; one of five related enzymes, which are active as heteromultimeric complexes; forms cytoplasmic foci upon DNA replication stress
NP38	C4	YIL079C	0.00134075	YIL079C	AIR1	Arginine methyltransferase-Interacting RING finger protein	Zinc knuckle protein; involved in nuclear RNA processing and degradation as a component of the TRAMP complex; stimulates the poly(A) polymerase activity of Pap2p in vitro; AIR1 has a paralog, AIR2, that arose from the whole genome duplication; although Air1p and Air2p are homologous TRAMP subunits, they have nonredundant roles in regulation of substrate specificity of the exosome
NP19	A4	YGR031W	0.00134054	YGR031W	IMO32	Intermediate cleaved by Mitochondrial Octapeptidyl aminopeptidase	Conserved mitochondrial protein of unknown function; processed by both mitochondrial processing peptidase and mitochondrial octapeptidyl aminopeptidase; gene contains the nested antisense gene NAG1
NP41	F12	YJR104C	0.00133663	YJR104C	SOD1	SuperOxide Dismutase	Cytosolic copper-zinc superoxide dismutase; detoxifies superoxide; stabilizes Yck1p and Yck2p kinases in glucose to repress respiration; phosphorylated by Dun1p, enters nucleus under oxidative stress to promote transcription of stress response genes; human ortholog SOD1 implicated in ALS complements a null allele; abundance increases under DNA replication stress and during exposure to boric acid;…
NP18	B10	YFL026W	0.00133587	YFL026W	STE2	STErile	Receptor for alpha-factor pheromone; seven transmembrane-domain GPCR that interacts with both pheromone and a heterotrimeric G protein to initiate the signaling response that leads to mating between haploid a and alpha cells
NP44	B11	YNL090W	0.00133331	YNL090W	RHO2	Ras HOmolog	Non-essential small GTPase of the Rho/Rac family of Ras-like proteins; involved in the establishment of cell polarity and in microtubule assembly
NP14	F3	YLR460C	0.00133189	YLR460C			Member of the quinone oxidoreductase family; up-regulated in response to the fungicide mancozeb; possibly up-regulated by iodine
NP23	B8	YCR107W	0.00132948	YCR107W	AAD3	Aryl-Alcohol Dehydrogenase	Putative aryl-alcohol dehydrogenase; similar to P. chrysosporium aryl-alcohol dehydrogenase; mutational analysis has not yet revealed a physiological role; AAD3 has a paralog, AAD15, that arose from a segmental duplication; members of the AAD gene family comprise three pairs (AAD3 + AAD15, AAD6/AAD16 + AAD4, AAD10 + AAD14) whose two genes are more related to one another than to other members of t…
NP15	D1	YPL112C	0.00132627	YPL112C	PEX25	PEroXisome related	Peripheral peroxisomal membrane peroxin; required for the regulation of peroxisome size and maintenance, recruits GTPase Rho1p to peroxisomes, induced by oleate, interacts with Pex27p; PEX25 has a paralog, PEX27, that arose from the whole genome duplication
NP26	H4	YDL201W	0.00132492	YDL201W	TRM8	Transfer RNA Methyltransferase	Catalytic subunit of a tRNA methyltransferase complex; Trm8p and Trm82p comprise an enzyme that catalyzes a methyl-transfer from S-adenosyl-l-methionine to the N(7) atom of guanine at position 46 in tRNA; Trm8 lacks catalytic activity if not bound to Trm82p
NP21	C2	YMR069W	0.00132148	YMR069W	NAT4	N-AcetylTransferase	N alpha-acetyl-transferase; involved in acetylation of the N-terminal residues of histones H4 and H2A
NP35	A3	YNL211C	0.001321	YNL211C	MRX7	Mitochondrial oRganization of gene eXpression (MIOREX)	Protein that associates with mitochondrial ribosome; green fluorescent protein (GFP)-fusion protein localizes to mitochondria; YNL211C is not an essential gene
NP43	C11	YDR379C-A	0.00131919	YDR379C-A	SDH6		Mitochondrial protein involved in assembly of succinate dehydrogenase; has a role in maturation of the Sdh2p subunit; member of the LYR protein family; mutations in human ortholog SDHAF1 are associated with infantile leukoencephalopathy
NP21	G3	YOL119C	0.00131757	YOL119C	MCH4	MonoCarboxylate transporter Homolog	Protein with similarity to mammalian monocarboxylate permeases; monocarboxylate permeases are involved in transport of monocarboxylic acids across the plasma membrane but mutant is not deficient in monocarboxylate transport
NP33	G7	YMR244W	0.00131592	YMR244W			Putative protein of unknown function; SWAT-GFP fusion protein localizes to the endoplasmic reticulum and vacuole, while mCherry fusion localizes to just the vacuole
NP3	H4	YDR370C	0.00131437	YDR370C	DXO1	Decapping eXOnuclease	mRNA 5'-end-capping quality-control protein; has distributive, 5'-3' exoRNase activity; similar to Rai1p;
NP38	D1	YKL003C	0.00131288	YKL003C	MRP17	Mitochondrial Ribosomal Protein	Mitochondrial ribosomal protein of the small subunit; MRP17 exhibits genetic interactions with PET122, encoding a COX3-specific translational activator
NP43	B6	YBR230W-A	0.00131273	YBR230W-A	COQ21	COQ interacting protein	Putative protein of unknown function; YBR230W-A has a paralog, COQ8, that arose from the whole genome duplication
NP20	A4	YBL006C	0.0013121	YBL006C	LDB7	Low Dye Binding	Component of the RSC chromatin remodeling complex; interacts with Rsc3p, Rsc30p, Npl6p, and Htl1p to form a module important for a broad range of RSC functions
NP20	B3	YBL021C	0.00131168	YBL021C	HAP3	Heme Activator Protein	Subunit of the Hap2p/3p/4p/5p CCAAT-binding complex; complex is heme-activated and glucose-repressed; complex is a transcriptional activator and global regulator of respiratory gene expression; contains sequences contributing to both complex assembly and DNA binding
NP16	A5	YPL005W	0.00130916	YPL005W	AEP3	ATPase ExPression	Peripheral mitochondrial inner membrane protein; may facilitate use of unformylated tRNA-Met in mitochondrial translation initiation; stabilizes the bicistronic AAP1-ATP6 mRNA
NP33	E2	YLR373C	0.00130677	YLR373C	VID22	Vacuolar Import and Degradation	Glycosylated integral membrane protein localized to plasma membrane; plays a role in fructose-1,6-bisphosphatase (FBPase) degradation; involved in FBPase transport from the cytosol to Vid (vacuole import and degradation) vesicles; VID22 has a paralog, ENV11, that arose from the whole genome duplication
NP38	G4	YLR332W	0.00130577	YLR332W	MID2	Mating pheromone-Induced Death	O-glycosylated plasma membrane protein; acts as a sensor for cell wall integrity signaling and activates the pathway; interacts with Rom2p, a guanine nucleotide exchange factor for Rho1p, and with cell integrity pathway protein Zeo1p; MID2 has a paralog, MTL1, that arose from the whole genome duplication
NP21	F2	YOL103W	0.00130575	YOL103W	ITR2	myo-Inositol TRansporter	Myo-inositol transporter; member of the sugar transporter superfamily; expressed constitutively; ITR2 has a paralog, ITR1, that arose from the whole genome duplication
NP23	G10	YBR024W	0.00130414	YBR024W	SCO2	Suppressor of Cytochrome Oxidase deficiency	Protein anchored to mitochondrial inner membrane; may have a redundant function with Sco1p in delivery of copper to cytochrome c oxidase; interacts with Cox2p; SCO2 has a paralog, SCO1, that arose from the whole genome duplication
NP24	C6	YDR163W	0.00130228	YDR163W	CWC15	Complexed With Cef1p	Non-essential protein involved in pre-mRNA splicing; component of a complex containing Cef1p; has similarity to S. pombe Cwf15p
NP37	G3	YDR283C	0.00130094	YDR283C	GCN2	General Control Nonderepressible	Protein kinase; phosphorylates the alpha-subunit of translation initiation factor eIF2 (Sui2p) in response to starvation; activated by uncharged tRNAs and the Gcn1p-Gcn20p complex; contributes to DNA damage checkpoint control
NP32	E3	YLL051C	0.00130056	YLL051C	FRE6	Ferric REductase	Putative ferric reductase with similarity to Fre2p; expression induced by low iron levels
NP32	H3	YLR053C	0.00129998	YLR053C			Putative protein of unknown function
NP16	H8	YJR060W	0.00129903	YJR060W	CBF1	Centromere Binding Factor	Basic helix-loop-helix (bHLH) protein; forms homodimer to bind E-box consensus sequence CACGTG present at MET gene promoters and centromere DNA element I (CDEI); affects nucleosome positioning at this motif; associates with other transcription factors such as Met4p and Isw1p to mediate transcriptional activation or repression; associates with kinetochore proteins, required for chromosome segregat…
NP38	G3	YLR307W	0.0012986	YLR307W	CDA1	Chitin DeAcetylase	Chitin deacetylase; together with Cda2p involved in the biosynthesis ascospore wall component, chitosan; required for proper rigidity of the ascospore wall
NP1	C10	YMR120C	0.00129836	YMR120C	ADE17	ADEnine	Enzyme of 'de novo' purine biosynthesis; contains both 5-aminoimidazole-4-carboxamide ribonucleotide transformylase and inosine monophosphate cyclohydrolase activities; ADE17 has a paralog, ADE16, that arose from the whole genome duplication; ade16 ade17 mutants require adenine and histidine
NP33	H5	YMR256C	0.00129806	YMR256C	COX7	Cytochrome c OXidase	Subunit VII of cytochrome c oxidase (Complex IV); Complex IV is the terminal member of the mitochondrial inner membrane electron transport chain
NP41	B8	YJL003W	0.00129737	YJL003W	COX16	Cytochrome c OXidase	Mitochondrial inner membrane protein; required for assembly of cytochrome c oxidase
NP20	F9	YAL053W	0.00129627	YAL053W	FLC2	FLavin Carrier	Putative calcium channel involved in calcium release under hypotonic stress; required for uptake of FAD into endoplasmic reticulum; involved in cell wall maintenance; FLC2 has a paralog, YOR365C, that arose from the whole genome duplication
NP21	E3	YOL087C	0.00129604	YOL087C	DUF1	DUB-associated Factor 1	Ubiquitin-binding protein of unknown function; contains one WD40 repeat in a beta-propeller fold; green fluorescent protein (GFP)-fusion protein localizes to the cytoplasm; homolog of human WDR48/UAF1, which is involved in regulating the Fanconi anemia pathway; deletion mutant is sensitive to various chemicals including phenanthroline, sanguinarine, and nordihydroguaiaretic acid
NP20	F11	YAL049C	0.00129519	YAL049C	AIM2	Altered Inheritance rate of Mitochondria	Cytoplasmic protein involved in mitochondrial function or organization; null mutant displays reduced frequency of mitochondrial genome loss; potential Hsp82p interactor
NP21	C6	YMR073C	0.00129463	YMR073C	IRC21	Increased Recombination Centers	Protein of unknown function; may be involved in resistance to carboplatin and cisplatin; null mutant displays increase in spontaneous Rad52p foci; contains a lipid-binding domain and binds cardiolipin in a large-scale study
NP20	C6	YBL046W	0.00129112	YBL046W	PSY4	Platinum SensitivitY	Regulatory subunit of protein phosphatase PP4; presence of Psy4p in the PP4 complex (along with catalytic subunit Pph3p and Psy2p) is required for dephosphorylation of the histone variant H2AX, but not for dephosphorylation of Rad53p, during recovery from the DNA damage checkpoint; localization is cell-cycle dependent and regulated by Cdc28p phosphorylation; required for cisplatin resistance; hom…
EP3	H8	YER157W	0.00128982	YER157W	COG3	Conserved Oligomeric Golgi complex	Essential component of the conserved oligomeric Golgi complex; a cytosolic tethering complex (Cog1p through Cog8p) that functions in protein trafficking to mediate fusion of transport vesicles to Golgi compartments
NP25	A7	YGL077C	0.00128448	YGL077C	HNM1	Hyper-resistance to Nitrogen Mustard	Plasma membrane transporter for choline, ethanolamine, and carnitine; involved in the uptake of nitrogen mustard and the uptake of glycine betaine during hypersaline stress; co-regulated with phospholipid biosynthetic genes and negatively regulated by choline and myo-inositol
NP20	H1	YAL028W	0.0012829	YAL028W	FRT2	Functionally Related to TCP1	Tail-anchored ER membrane protein of unknown function; interacts with homolog Frt1p; promotes growth in conditions of high Na+, alkaline pH, or cell wall stress, possibly via a role in posttranslational translocation; potential Cdc28p substrate; FRT2 has a paralog, FRT1, that arose from the whole genome duplication
NP16	H1	YJR050W	0.00128147	YJR050W	ISY1	Interactor of SYf1p	Member of the NineTeen Complex (NTC); NTC contains Prp19p and stabilizes U6 snRNA in catalytic forms of spliceosome containing U2, U5, and U6 snRNAs; interacts with Prp16p to modulate splicing fidelity; isy1 syf2 cells have defective spindles
NP38	B9	YGR200C	0.00128023	YGR200C	ELP2	ELongator Protein	Subunit of Elongator complex; binds to microtubules via conserved alkaline residues; has two seven-bladed WD40 &#946; propellers; Elongator complex is required for modification of wobble nucleosides in tRNA; target of Kluyveromyces lactis zymocin
NP39	D5	YKR095W	0.0012797	YKR095W	MLP1	Myosin-Like Protein	Myosin-like protein associated with the nuclear envelope; nuclear basket protein that connects the nuclear pore complex with the nuclear interior; involved with Tel1p in telomere length control; involved with Pml1p and Pml39p in nuclear retention of unspliced mRNAs; MLP1 has a paralog, MLP2, that arose from the whole genome duplication
EP12	D12	YGR280C	0.00127727	YGR280C	PXR1	PinX1-Related gene	Essential protein involved in rRNA and snoRNA maturation; competes with TLC1 RNA for binding to Est2p, suggesting a role in negative regulation of telomerase; human homolog inhibits telomerase; contains a G-patch RNA interacting domain
NP34	H8	YNL223W	0.00127716	YNL223W	ATG4	AuTophaGy related	Conserved cysteine protease required for autophagy; cleaves Atg8p to a form required for autophagosome and Cvt vesicle generation
NP15	A2	YPL173W	0.00127689	YPL173W	MRPL40	Mitochondrial Ribosomal Protein, Large subunit	Mitochondrial ribosomal protein of the large subunit
NP13	G9	YPL196W	0.00127643	YPL196W	OXR1	OXidation Resistance	Protein of unknown function required for oxidative damage resistance; required for normal levels of resistance to oxidative damage; null mutants are sensitive to hydrogen peroxide; member of a conserved family of proteins found in eukaryotes
EP9	G5	YNR053C	0.00127435	YNR053C	NOG2	NucleOlar G-protein	Putative GTPase; associates with pre-60S ribosomal subunits in the nucleolus and is required for their nuclear export and maturation; recruited by ribosomal proteins L17, L35, and L37 to assembling ribosomes after 27SB pre-rRNA is generated, immediately preceding removal of ITS2
NP20	H6	YAL021C	0.00127322	YAL021C	CCR4	Carbon Catabolite Repression	Component of the CCR4-NOT transcriptional complex; CCR4-NOT is involved in regulation of gene expression; component of the major cytoplasmic deadenylase, which is involved in mRNA poly(A) tail shortening
NP39	A4	YNL005C	0.00126737	YNL005C	MRP7	Mitochondrial Ribosomal Protein	Mitochondrial ribosomal protein of the large subunit
NP20	G9	YAL034C	0.00126434	YAL034C	FUN19	Function Unknown Now	Non-essential protein of unknown function; expression induced in response to heat stress; FUN19 has a paralog, YOR338W, that arose from the whole genome duplication
NP16	D12	YPR171W	0.00125654	YPR171W	BSP1	Binding protein of Synaptojanin Polyphosphoinositide phosphatase domain	Adapter that links synaptojanins to the cortical actin cytoskeleton; the synaptojanins are Inp52p and Inp53p
NP22	E9	YCR092C	0.00125457	YCR092C	MSH3	MutS Homolog	Mismatch repair protein; forms dimers with Msh2p that mediate repair of insertion or deletion mutations and removal of nonhomologous DNA ends, contains a PCNA (Pol30p) binding motif required for genome stability
NP38	D9	YKL137W	0.00125179	YKL137W	CMC1	Cx9C Mitochondrial protein necessary for full assembly of Cytochrome c oxidase	Copper-binding protein of the mitochondrial intermembrane space; evolutionarily conserved; may be involved in delivering copper from the matrix to the cytochrome c oxidase complex; contains a twin CX9C motif
NP4	D3	YHR163W	0.00125142	YHR163W	SOL3	Suppressor Of Los1-1	6-phosphogluconolactonase; catalyzes the second step of the pentose phosphate pathway; weak multicopy suppressor of los1-1 mutation; homologous to Sol2p and Sol1p; SOL3 has a paralog, SOL4, that arose from the whole genome duplication
EP5	F1	YHR170W	0.00124912	YHR170W	NMD3	Nonsense-Mediated mRNA Decay	Protein involved in nuclear export of the large ribosomal subunit; acts as a Crm1p-dependent adapter protein for export of nascent ribosomal subunits through the nuclear pore complex
NP36	F2	YML016C	0.00124796	YML016C	PPZ1	Protein Phosphatase Z	Serine/threonine protein phosphatase Z, isoform of Ppz2p; involved in regulation of potassium transport, which affects osmotic stability, cell cycle progression, and halotolerance
NP41	F11	YJR094C	0.00124788	YJR094C	IME1	Inducer of MEiosis	Master regulator of meiosis that is active only during meiotic events; activates transcription of early meiotic genes through interaction with Ume6p; degraded by the 26S proteasome following phosphorylation by Ime2p; transcription is negatively regulated in cis by the IRT1 long noncoding antisense RNA
NP20	G12	YAL029C	0.00124766	YAL029C	MYO4	MYOsin	Type V myosin motor involved in actin-based transport of cargos; required for mRNA transport, including ASH1 mRNA, and facilitating the growth and movement of ER tubules into the growing bud along with She3p; MYO4 has a paralog, MYO2, that arose from the whole genome duplication
NP31	D4	YLR039C	0.00124326	YLR039C	RIC1	RIbosome Control	Protein involved in retrograde transport to the cis-Golgi network; forms heterodimer with Rgp1p that acts as a GTP exchange factor for Ypt6p; involved in transcription of rRNA and ribosomal protein genes
NP20	E4	YBL085W	0.00124294	YBL085W	BOI1	Bem1 (One) Interacting protein	Protein implicated in polar growth; functionally redundant with Boi2p; interacts with bud-emergence protein Bem1p; contains an SH3 (src homology 3) domain and a PH (pleckstrin homology) domain; relocalizes from bud neck to cytoplasm upon DNA replication stress; BOI1 has a paralog, BOI2, that arose from the whole genome duplication
NP21	C7	YMR075W	0.00124195	YMR075W	RCO1		Essential component of the Rpd3S histone deacetylase complex; interacts with Eaf3p
NP41	E7	YOL101C	0.00123927	YOL101C	IZH4	Implicated in Zinc Homeostasis	Membrane protein involved in zinc ion homeostasis; member of the four-protein IZH family; expression induced by fatty acids and altered zinc levels; deletion reduces sensitivity to excess zinc; possible role in sterol metabolism; protein increases in abundance and relocalizes from nucleus to ER upon DNA replication stress; IZH4 has a paralog, IZH1, that arose from the whole genome duplication
NP21	G10	YOL131W	0.00123842	YOL131W			Putative protein of unknown function; YOL131W has a paralog, STB1, that arose from the whole genome duplication
EP3	G9	YER094C	0.0012351	YER094C	PUP3	PUtative Proteasome subunit	Beta 3 subunit of the 20S proteasome; involved in ubiquitin-dependent catabolism; human homolog is subunit C10
EP3	B2	YDR324C	0.0012333	YDR324C	UTP4	U Three Protein	Subunit of U3-containing 90S preribosome and SSU processome complexes; involved in production of 18S rRNA and assembly of small ribosomal subunit; member of t-Utp subcomplex involved with transcription of 35S rRNA transcript; Small Subunit processome is also known as SSU processome
NP2	F12	YDR294C	0.00123038	YDR294C	DPL1	Dihydrosphingosine Phosphate Lyase	Dihydrosphingosine phosphate lyase; regulates intracellular levels of sphingolipid long-chain base phosphates (LCBPs), degrades phosphorylated long chain bases, prefers C16 dihydrosphingosine-l-phosphate as a substrate
NP23	B3	YGR241C	0.00122845	YGR241C	YAP1802	Yeast Assembly Polypeptide	Protein of the AP180 family, involved in clathrin cage assembly; binds Pan1p and clathrin; YAP1802 has a paralog, YAP1801, that arose from the whole genome duplication
NP35	F3	YNL021W	0.00122833	YNL021W	HDA1	Histone DeAcetylase	Putative catalytic subunit of a class II histone deacetylase complex; role in azole resistance via Hsp90p, and in the heat shock response; Hda1p interacts with the Hda2p-Hda3p subcomplex to form an active tetramer; deletion increases histone H2B, H3 and H4 acetylation; other members of the HDA1 histone deacetylase complex are Hda2p and Hda3p
NP18	C6	YNL072W	0.00122562	YNL072W	RNH201	RNase H	Ribonuclease H2 catalytic subunit; removes RNA primers during Okazaki fragment synthesis and errant ribonucleotides misincorporated during DNA replication; role in ribonucleotide excision repair; homolog of RNAse HI; related to human AGS4 which causes Aicardi-Goutieres syndrome
NP23	H5	YBR037C	0.0012251	YBR037C	SCO1	Suppressor of Cytochrome Oxidase deficiency	Copper-binding protein of mitochondrial inner membrane; required for cytochrome c oxidase activity and respiration; may function to deliver copper to cytochrome c oxidase; similar to thioredoxins; SCO1 has a paralog, SCO2, that arose from the whole genome duplication
NP14	E3	YLR436C	0.00122419	YLR436C	ECM30	ExtraCellular Mutant	Protein of unknown function; may play a role in cell wall biosynthesis, mutants have abormal relative levels of mannose and glucose and have Gap1p sorting and transport defects; (GFP)-fusion protein localizes to the cytoplasm
NP14	C10	YKR080W	0.00122157	YKR080W	MTD1	Methylene Tetrahydrafolate Dehydrogenase	NAD-dependent 5,10-methylenetetrahydrafolate dehydrogenase; plays a catalytic role in oxidation of cytoplasmic one-carbon units; expression is regulated by Bas1p and Bas2p, repressed by adenine, and may be induced by inositol and choline
NP41	H5	YJR030C	0.00121955	YJR030C	RBH2	Ran Binding domain Homolog	Putative protein of unknown function; expression repressed in carbon limited vs carbon replete chemostat cultures; non-essential gene; contains a PH-like domain; RBH2 has a paralog, RBH1, that arose from the whole genome duplication
NP20	B2	YBL019W	0.00121894	YBL019W	APN2	APurinic/apyrimidinic eNdonuclease	Class II abasic (AP) endonuclease involved in repair of DNA damage; homolog of human HAP1 and E. coli exoIII
NP23	B6	YGR247W	0.00121598	YGR247W	CPD1	Cyclic nucleotide PhosphoDiesterase	Cyclic nucleotide phosphodiesterase; hydrolyzes ADP-ribose 1'', 2''-cyclic phosphate to ADP-ribose 1''-phosphate; may have a role in tRNA splicing; no detectable phenotype is conferred by null mutation or by overexpression; protein abundance increases in response to DNA replication stress
NP16	H5	YJR055W	0.00121591	YJR055W	HIT1	HIgh Temperature growth	Protein involved in C/D snoRNP assembly; regulates abundance of Rsa1p; required for growth at high temperature; similar to human ZNHIT3
NP38	F3	YLR054C	0.00121577	YLR054C	OSW2	Outer Spore Wall	Protein of unknown function reputedly involved in spore wall assembly
NP2	C1	YML086C	0.00121023	YML086C	ALO1	D-Arabinono-1,4-Lactone Oxidase	D-Arabinono-1,4-lactone oxidase; catalyzes the final step in biosynthesis of dehydro-D-arabinono-1,4-lactone, which is protective against oxidative stress
NP37	E2	YML119W	0.00120859	YML119W			Putative protein of unknown function; YML119W is not an essential gene; potential Cdc28p substrate
NP1	F10	YKL005C	0.00120835	YKL005C	BYE1	BYpass of ESS1	Negative regulator of transcription elongation; contains a TFIIS-like domain that associates with chromatin and a PHD domain that interacts with H3K4me3; multicopy suppressor of temperature-sensitive ess1 mutations, binds RNA polymerase II large subunit
NP20	H4	YAL023C	0.00120515	YAL023C	PMT2	Protein O-MannosylTransferase	Protein O-mannosyltransferase of the ER membrane; transfers mannose residues from dolichyl phosphate-D-mannose to protein serine/threonine residues; involved in ER quality control; acts in a complex with Pmt1p, can instead interact with Pmt5p; antifungal drug target; PMT2 has a paralog, PMT3, that arose from the whole genome duplication
NP2	H2	YDR317W	0.00120496	YDR317W	HIM1	High Induced Mutagenesis	Protein of unknown function involved in DNA repair
NP23	F7	YBL107C	0.00120484	YBL107C	MIX23	Mitochondrial Intermembrane space CX(n)C motif protein	Mitochondrial intermembrane space protein of unknown function; imported via the MIA import machinery; contains an unusual twin cysteine motif (CX13C CX14C)
NP38	G12	YMR226C	0.00120309	YMR226C			NADP(+)-dependent serine dehydrogenase and carbonyl reductase; acts on serine, L-allo-threonine, and other 3-hydroxy acids; green fluorescent protein fusion protein localizes to the cytoplasm and nucleus; may interact with ribosomes, based on co-purification experiments
NP20	D12	YBL078C	0.00120225	YBL078C	ATG8	AuTophaGy related	Component of autophagosomes and Cvt vesicles; regulator of Atg1p, targets it to autophagosomes; binds the Atg1p-Atg13p complex, triggering its vacuolar degradation; unique ubiquitin-like protein whose conjugation target is lipid phosphatidylethanolamine (PE); Atg8p-PE is anchored to membranes, is involved in phagophore expansion, and may mediate membrane fusion during autophagosome formation; dec…
NP44	F3	YGL101W	0.00120159	YGL101W	YGK1		Protein of unknown function; non-essential gene; interacts with the DNA helicase Hpr5p; YGL101W has a paralog, YBR242W, that arose from the whole genome duplication
EP9	H6	YOL078W	0.00120073	YOL078W	AVO1	Adheres VOraciously (to TOR2)	Component of a membrane-bound complex containing the Tor2p kinase; contains Tor2p kinase and other proteins; may have a role in regulation of cell growth
NP41	F1	YMR101C	0.00119759	YMR101C	SRT1	Suppressor of Rer-Two	Forms the dehydrodolichyl diphosphate syntase (DDS) complex with NUS1; involved in synthesis of long-chain dolichols (19-22 isoprene units; as opposed to Rer2p which synthesizes shorter-chain dolichols); localizes to lipid bodies; transcription is induced during stationary phase
NP15	D8	YPL103C	0.00119691	YPL103C	FMP30	Found in Mitochondrial Proteome	Protein with a role in maintaining mitochondrial morphology; also involved in maintaining normal cardiolipin levels; mitochondrial inner membrane protein; proposed to be involved in N-acylethanolamine metabolism; related to mammalian N-acylPE-specific phospholipase D
NP2	E11	YDR268W	0.00119555	YDR268W	MSW1	Mitochondrial aminoacyl-tRNA Synthetase, tryptophan (W)	Mitochondrial tryptophanyl-tRNA synthetase
NP38	C6	YIL134W	0.00119323	YIL134W	FLX1	FLavin eXchange	Mitochondrial flavin adenine dinucleotide transporter; FAD is a synthesis product of riboflavin; human homolog SLC25A32 is implicated in multiple acyl-CoA dehydrogenase deficiency (MADD) or glutaric aciduria type II (GAII), and can complement yeast null mutant
NP32	G10	YLR043C	0.00119137	YLR043C	TRX1	ThioRedoXin	Cytoplasmic thioredoxin isoenzyme; part of thioredoxin system which protects cells against oxidative and reductive stress; forms LMA1 complex with Pbi2p; acts as a cofactor for Tsa1p; required for ER-Golgi transport and vacuole inheritance; with Trx2p, facilitates mitochondrial import of small Tims Tim9p, Tim10p, Tim13p by maintaining them in reduced form; abundance increases iunder DNA replicati…
NP19	B5	YGR056W	0.0011906	YGR056W	RSC1	Remodel the Structure of Chromatin	Component of the RSC chromatin remodeling complex; required for expression of mid-late sporulation-specific genes; contains two essential bromodomains, a bromo-adjacent homology (BAH) domain, and an AT hook; RSC1 has a paralog, RSC2, that arose from the whole genome duplication
NP24	B6	YBR071W	0.00118971	YBR071W			Protein of unknown function found in the cytoplasm and bud neck; mRNA expression may be regulated by the cell cycle and/or cell wall stress; overexpression of YBR071W affects endocytic protein trafficking
NP10	B6	YOR027W	0.00118325	YOR027W	STI1	STress Inducible	Hsp90 cochaperone; regulates spatial organization of amyloid-like proteins in the cytosol, thereby buffering the proteotoxicity caused by amyloid-like proteins; interacts with the Ssa group of the cytosolic Hsp70 chaperones and activates Ssa1p ATPase activity; interacts with Hsp90 chaperones and inhibits their ATPase activity; homolog of mammalian Hop
NP24	B9	YBR077C	0.00118234	YBR077C	SLM4	Synthetic Lethal with Mss4	Subunit of the EGO/GSE complex; the vacuolar/endosomal membrane associated EGO/GSE complex regulates exit from rapamycin-induced growth arrest, stimulating microautophagy and sorting of Gap1p from the endosome to the plasma membrane; essential for the integrity and function of EGO; gene exhibits synthetic genetic interaction with MSS4
NP38	E1	YKL191W	0.00118184	YKL191W	DPH2	DiPHthamide	Protein required for synthesis of diphthamide; required along with Dph1p, Kti11p, Jjj3p, and Dph5p; diphthamide is a modified histidine residue of translation elongation factor 2 (Eft1p or Eft2p); may act in a complex with Dph1p and Kti11p
NP2	D10	YDR254W	0.00118038	YDR254W	CHL4	CHromosome Loss	Outer kinetochore protein required for chromosome stability; involved in new kinetochore assembly and sister chromatid cohesion; forms a stable complex with Iml3p; peripheral component of the Ctf19 kinetochore complex that interacts with Ctf19p, Ctf3p, and Mif2p; required for the spindle assembly checkpoint; orthologous to human centromere constitutive-associated network (CCAN) subunit CENP-N and…
NP41	H2	YJR008W	0.00117834	YJR008W	MHO1	Memo HOmolog	Protein of unknown function; inhibits haploid invasive growth when overexpressed; synthetically lethal with phospholipase C (PLC1); expression induced by mild heat-stress on a non-fermentable carbon source, upon entry into stationary phase and upon nitrogen deprivation; repressed by inosine and choline in an Opi1p-dependent manner; highly conserved from bacteria to human; Memo, the human homolog,…
NP13	H4	YGR261C	0.00117812	YGR261C	APL6	clathrin Adaptor Protein complex Large chain	Beta3-like subunit of the yeast AP-3 complex; functions in transport of alkaline phosphatase to the vacuole via the alternate pathway; exists in both cytosolic and peripherally associated membrane-bound pools
NP19	A5	YGR033C	0.00117805	YGR033C	TIM21	Translocase of the Inner Mitochondrial membrane	Nonessential component of the TIM23 complex; interacts with the Translocase of the Outer Mitochondrial membrane (TOM complex) and with respiratory enzymes; may regulate the Translocase of the Inner Mitochondrial membrane (TIM23 complex) activity
NP14	H3	YPL186C	0.00117471	YPL186C	UIP4	Ulp1 Interacting Protein	Protein that interacts with Ulp1p; a Ubl (ubiquitin-like protein)-specific protease for Smt3p protein conjugates; detected in a phosphorylated state in the mitochondrial outer membrane; also detected in ER and nuclear envelope
NP41	G3	YJR122W	0.00117017	YJR122W	IBA57	Iron-sulfur cluster assembly factor for Biotin synthase and Aconitase-like mitochondrial proteins	Protein involved in incorporating iron-sulfur clusters into proteins; mitochondrial matrix protein; involved in the incorporation of iron-sulfur clusters into mitochondrial aconitase-type proteins; activates the radical-SAM family members Bio2p and Lip5p; interacts with Ccr4p in the two-hybrid system
NP21	E2	YOL086C	0.00116925	YOL086C	ADH1	Alcohol DeHydrogenase	Alcohol dehydrogenase; fermentative isozyme active as homo- or heterotetramers; required for the reduction of acetaldehyde to ethanol, the last step in the glycolytic pathway; ADH1 has a paralog, ADH5, that arose from the whole genome duplication
NP19	A8	YGR036C	0.00116684	YGR036C	CAX4	CAlmodulin-dependent in cmd one two twenty-siX	Dolichyl pyrophosphate (Dol-P-P) phosphatase; has a luminally oriented active site in the ER; cleaves the anhydride linkage in Dol-P-P; required for Dol-P-P-linked oligosaccharide intermediate synthesis and protein N-glycosylation
NP22	B1	YER134C	0.00116455	YER134C			Magnesium-dependent acid phosphatase; member of the haloacid dehalogenase superfamily; non-essential gene
NP36	H8	YML087C	0.00116433	YML087C	AIM33	Altered Inheritance rate of Mitochondria	Protein of unknown function, highly conserved across species; homolog of human CYB5R4; null mutant displays reduced frequency of mitochondrial genome loss; AIM33 has a paralog, PGA3, that arose from the whole genome duplication
NP41	B2	YJR145C	0.00116394	YJR145C	RPS4A	Ribosomal Protein of the Small subunit	Protein component of the small (40S) ribosomal subunit; mutation affects 20S pre-rRNA processing; homologous to mammalian ribosomal protein S4, no bacterial homolog; RPS4A has a paralog, RPS4B, that arose from the whole genome duplication
NP2	G2	YDR296W	0.00116366	YDR296W	MHR1	Mitochondrial Homologous Recombination	Mitochondrial ribosomal protein of the large subunit; also involved in homologous recombination in mitochondria; required for recombination-dependent mtDNA partitioning; involved in stimulation of mitochondrial DNA replication in response to oxidative stress
NP21	A1	YAL013W	0.00116356	YAL013W	DEP1	Disability in regulation of Expression of genes involved in Phospholipid biosynthesis	Component of the Rpd3L histone deacetylase complex; required for diauxic shift-induced histone H2B deposition onto rDNA genes; transcriptional modulator involved in regulation of structural phospholipid biosynthesis genes and metabolically unrelated genes, as well as maintenance of telomeres, mating efficiency, and sporulation
NP41	C1	YJR052W	0.00116283	YJR052W	RAD7	RADiation sensitive	Nucleotide excision repair (NER) protein; binds damaged DNA during NER; binds DNA in an ATP-dependent manner (with Rad16p) during NER; required for repair of non-transcribed chromatin; subunit of Nucleotide Excision Repair Factor 4 (NEF4) and the Elongin-Cullin-Socs (ECS) ligase complex
NP41	E8	YOL110W	0.00116208	YOL110W	SHR5	Suppressor of Hyperactive Ras	Palmitoyltransferase subunit; this complex adds a palmitoyl lipid moiety to heterolipidated substrates such as Ras1p and Ras2p through a thioester linkage; palmitoylation is required for Ras2p membrane localization; Palmitoyltransferase is composed of Shr5p and Erf2
NP36	H4	YMR041C	0.00115795	YMR041C	ARA2	ARAbinose	NAD-dependent arabinose dehydrogenase; involved in biosynthesis of dehydro-D-arabinono-1,4-lactone; similar to plant L-galactose dehydrogenase
NP19	A9	YGR037C	0.00115622	YGR037C	ACB1	Acyl-CoA-Binding	Acyl-CoA-binding protein; transports newly synthesized acyl-CoA esters from fatty acid synthetase (Fas1p-Fas2p) to acyl-CoA-consuming processes; subject to starvation-induced, Grh1p-mediated unconventional secretion; protein abundance increases in response to DNA replication stress
NP20	D1	YBL058W	0.00115474	YBL058W	SHP1	Suppressor of High-copy PP1	UBX domain-containing substrate adaptor for Cdc48p; ubiquitin regulatory X domain-containing protein that acts as a substrate recruiting cofactor for Cdc48p; positively regulates Glc7p PPase activity to promote growth and mitotic progression in complex with Cdc48p; ubiquitinated protein interactor involved in ER-associated degradation (ERAD); regulated by nuclear Ub-dependent degradation (INMAD p…
NP41	B7	YMR172W	0.00115469	YMR172W	HOT1	High-Osmolarity-induced Transcription	Transcription factor for glycerol biosynthetic genes; required for the transient induction of glycerol biosynthetic genes GPD1 and GPP2 in response to high osmolarity; targets Hog1p to osmostress responsive promoters; has similarity to Msn1p and Gcr1p
NP38	C1	YHR179W	0.00115341	YHR179W	OYE2	Old Yellow Enzyme	Conserved NADPH oxidoreductase containing flavin mononucleotide (FMN); responsible for geraniol reduction into citronellol during fermentation; homologous to Oye3p with different ligand binding and catalytic properties; may be involved in sterol metabolism, oxidative stress response, and programmed cell death; protein abundance increases in response to DNA replication stress
NP22	D9	YER182W	0.00115279	YER182W	FMP10	Found in Mitochondrial Proteome	Putative protein of unknown function; the authentic, non-tagged protein is detected in highly purified mitochondria in high-throughput studies
NP21	A4	YAL009W	0.00115253	YAL009W	SPO7	SPOrulation	Putative regulatory subunit of Nem1p-Spo7p phosphatase holoenzyme; regulates nuclear growth by controlling phospholipid biosynthesis, required for normal nuclear envelope morphology, premeiotic replication, and sporulation
NP24	B5	YBR069C	0.00114904	YBR069C	TAT1	Tyrosine and tryptophan Amino acid Transporter	Amino acid transporter for valine, leucine, isoleucine, and tyrosine; low-affinity tryptophan and histidine transporter; overexpression confers FK506 and FTY720 resistance; protein abundance increases in response to DNA replication stress
NP20	F4	YAL060W	0.00114774	YAL060W	BDH1	Butanediol DeHydrogenase	NAD-dependent (R,R)-butanediol dehydrogenase; catalyzes oxidation of (R,R)-2,3-butanediol to (3R)-acetoin, oxidation of meso-butanediol to (3S)-acetoin, and reduction of acetoin; enhances use of 2,3-butanediol as an aerobic carbon source
NP8	D8	YKR061W	0.00114675	YKR061W	KTR2	Kre Two Related	Mannosyltransferase involved in N-linked protein glycosylation; member of the KRE2/MNT1 mannosyltransferase family; KTR2 has a paralog, YUR1, that arose from the whole genome duplication
EP12	A5	YER093C	0.00114654	YER093C	TSC11	Temperature-sensitive Suppressors of Csg2 mutants	Subunit of TORC2 (Tor2p-Lst8p-Avo1-Avo2-Tsc11p-Bit61p); TORC2 is a membrane-associated complex that regulates actin cytoskeletal dynamics during polarized growth and cell wall integrity; involved in sphingolipid metabolism; contains a RasGEFN domain
NP2	G10	YDR310C	0.00114635	YDR310C	SUM1	SUppresor of Mar1-1	Transcriptional repressor that regulates middle-sporulation genes; required for mitotic repression of middle sporulation-specific genes; also acts as general replication initiation factor; involved in telomere maintenance, chromatin silencing; regulated by pachytene checkpoint
NP21	B2	YAR020C	0.00114469	YAR020C	PAU7	seriPAUperin family	Member of the seripauperin multigene family; active during alcoholic fermentation, regulated by anaerobiosis, inhibited by oxygen, repressed by heme
NP5	A12	YIL060W	0.00114302	YIL060W			Mitochondrial protein of unknown function; required for respiratory growth; mutant accumulates less glycogen than does wild type; null mutation results in a decrease in plasma membrane electron transport; YIL060W is not an essential gene
NP20	B12	YBL036C	0.00114125	YBL036C			Putative non-specific single-domain racemase; based on structural similarity; binds pyridoxal 5'-phosphate; expression of GFP-fusion protein induced in response to the DNA-damaging agent MMS
NP5	C11	YIL121W	0.00113921	YIL121W	QDR2	QuiniDine Resistance	Plasma membrane transporter of the major facilitator superfamily; member of the 12-spanner drug:H(+) antiporter DHA1 family; exports copper; has broad substrate specificity and can transport many mono- and divalent cations; transports a variety of drugs and is required for resistance to quinidine, barban, cisplatin, and bleomycin; contributes to potassium homeostasis; expression is regulated by c…
NP19	A1	YER010C	0.00113565	YER010C			Bifunctional HMG aldolase/oxaloacetate decarboxylase; requires divalent metal ions for activity; competitively inhibited by oxalate; forms a ring-shaped homotrimer; similar to members of the prokaryotic RraA family of class II (divalent metal ion dependent) pyruvate aldolases from the meta cleavage pathways of protocatechuate and gallate
NP20	C5	YBL045C	0.00113336	YBL045C	COR1	CORe protein of QH2 cytochrome c reductase	Core subunit of the ubiquinol-cytochrome c reductase complex; the ubiquinol-cytochrome c reductase complex (bc1 complex) is a component of the mitochondrial inner membrane electron transport chain
NP41	F6	YML027W	0.00112997	YML027W	YOX1	Yeast homeobOX	Homeobox transcriptional repressor; binds to Mcm1p and to early cell cycle boxes (ECBs) in the promoters of cell cycle-regulated genes expressed in M/G1 phase; expression is cell cycle-regulated; phosphorylated by Cdc28p; relocalizes from nucleus to cytoplasm upon DNA replication stress; YOX1 has a paralog, YHP1, that arose from the whole genome duplication
NP13	E8	YPL241C	0.00112961	YPL241C	CIN2	Chromosome INstability	GTPase-activating protein (GAP) for Cin4p; tubulin folding factor C involved in beta-tubulin (Tub2p) folding; mutants display increased chromosome loss and benomyl sensitivity; human homolog RP2 complements yeast null mutant
NP41	D4	YBR086C	0.00112919	YBR086C	IST2	Increased Sodium Tolerance	Cortical ER protein involved in ER-plasma membrane tethering; one of 6 proteins (Ist2p, Scs2p, Scs22p, Tcb1p, Tcb2p, Tcb3p) that connect ER to the plasma membrane (PM) and regulate PM phosphatidylinositol-4-phosphate (PI4P) levels by controlling access of Sac1p phosphatase to its substrate PI4P in the PM; localizes to the mother cell in small-budded cells and to the bud in medium- and large-budde…
EP10	A3	YOL135C	0.00112717	YOL135C	MED7	MEDiator complex	Subunit of the RNA polymerase II mediator complex; associates with core polymerase subunits to form the RNA polymerase II holoenzyme; essential for transcriptional regulation
NP22	F2	YCR101C	0.00112676	YCR101C			Putative protein of unknown function; localizes to the membrane fraction; YCR101C is not an essential gene
NP30	A5	YBR172C	0.0011266	YBR172C	SMY2	Suppressor of MYo2-66	GYF domain protein; involved in COPII vesicle formation; interacts with the Sec23p/Sec24p subcomplex; overexpression suppresses the temperature sensitivity of a myo2 mutant; similar to S. pombe Mpd2; SMY2 has a paralog, SYH1, that arose from the whole genome duplication
NP21	G8	YOL128C	0.00112595	YOL128C	YGK3	Yeast homolog of Glycogen synthase Kinase	Protein kinase related to mammalian GSK-3 glycogen synthase kinases; GSK-3 homologs (Mck1p, Rim11p, Mrk1p, Ygk3p) are involved in control of Msn2p-dependent transcription of stress responsive genes and in protein degradation; YGK3 has a paralog, MCK1, that arose from the whole genome duplication
NP20	E9	YBL091C	0.00112516	YBL091C	MAP2	Methionine AminoPeptidase	Methionine aminopeptidase; catalyzes the cotranslational removal of N-terminal methionine from nascent polypeptides; function is partially redundant with that of Map1p
NP20	A3	YBL005W	0.00112455	YBL005W	PDR3	Pleiotropic Drug Resistance	Transcriptional activator of the pleiotropic drug resistance network; regulates expression of ATP-binding cassette (ABC) transporters through binding to cis-acting PDRE sites (PDR responsive elements); has a role in response to drugs and organic solvents; post-translationally up-regulated in cells lacking functional mitochondrial genome; involved in diauxic shift; relative distribution to nucleus…
NP18	B12	YFR013W	0.00112353	YFR013W	IOC3	Iswi One Complex	Subunit of the Isw1a complex; Isw1a has nucleosome-stimulated ATPase activity and represses transcription initiation by specific positioning of a promoter proximal dinucleosome; promotes nucleosome shifts in the 5 prime direction; IOC3 has a paralog, ESC8, that arose from the whole genome duplication
NP41	E12	YMR004W	0.00112272	YMR004W	MVP1	Multi-copy suppressor of vps1	Protein required for sorting proteins to the vacuole; Mvp1p and Vps1p act in concert to promote membrane traffic to the vacuole; participates in transcription initiation and/or early elongation of specific genes; interacts with "foot domain" of RNA polymerase II; deletion results in abnormal CTD-Ser5 phosphorylation of RNA polymerase II at specific promoter regions; protein abundance increases in…
NP24	H12	YGL059W	0.00112181	YGL059W	PKP2	Protein Kinase of PDH	Mitochondrial protein kinase; negatively regulates activity of the pyruvate dehydrogenase complex by phosphorylating the ser-133 residue of the Pda1p subunit; acts in concert with kinase Pkp1p and phosphatases Ptc5p and Ptc6p; relocalizes from mitochondrion to cytoplasm upon DNA replication stress
NP19	B3	YGR054W	0.0011197	YGR054W			Eukaryotic initiation factor eIF2A; associates specifically with both 40S subunits and 80 S ribosomes, and interacts genetically with both eIF5b and eIF4E; homologous to mammalian eIF2A
NP21	H3	YER101C	0.00111906	YER101C	AST2	ATPase STabilizing	Lipid raft associated protein; overexpression restores Pma1p localization to lipid rafts which is required for targeting of Pma1p to the plasma membrane; sometimes classified in the medium-chain dehydrogenase/reductases (MDRs) superfamily; AST2 has a paralog, AST1, that arose from the whole genome duplication
NP37	H9	YER020W	0.00111886	YER020W	GPA2	G Protein Alpha subunit	Nucleotide binding alpha subunit of the heterotrimeric G protein; interacts with the receptor Gpr1p, has signaling role in response to nutrients; required for the recruitment of Ras-GTP at the plasma membrane and in the nucleus
NP41	H9	YOR087W	0.00111591	YOR087W	YVC1	Yeast Vacuolar Conductance	Vacuolar cation channel; mediates release of Ca(2+) from the vacuole in response to hyperosmotic shock
NP19	G2	YJL062W	0.00111423	YJL062W	LAS21	Local Anestheticum Sensitive	Integral plasma membrane protein; involved in the synthesis of the glycosylphosphatidylinositol (GPI) core structure; mutations affect cell wall integrity
NP41	F2	YMR105C	0.00111415	YMR105C	PGM2	PhosphoGlucoMutase	Phosphoglucomutase; catalyzes the conversion from glucose-1-phosphate to glucose-6-phosphate, which is a key step in hexose metabolism; functions as the acceptor for a Glc-phosphotransferase; protein abundance increases in response to DNA replication stress; PGM2 has a paralog, PGM1, that arose from the whole genome duplication
NP13	A8	YOL044W	0.00111407	YOL044W	PEX15	PEroXisome related	Tail-anchored type II integral peroxisomal membrane protein; required for peroxisome biogenesis; cells lacking Pex15p mislocalize peroxisomal matrix proteins to cytosol; overexpression results in impaired peroxisome assembly
NP3	C11	YHR059W	0.0011121	YHR059W	FYV4	Function required for Yeast Viability	Protein of unknown function; required for survival upon exposure to K1 killer toxin
NP21	B1	YAR018C	0.00111131	YAR018C	KIN3	protein KINase	Nonessential serine/threonine protein kinase; possible role in DNA damage response; influences tolerance to high levels of ethanol
NP6	A10	YDR057W	0.00111089	YDR057W	YOS9	Yeast OS-9 homolog	ER quality-control lectin; integral subunit of the HRD ligase; participates in efficient ER retention of misfolded proteins by recognizing them and delivering them to Hrd1p; binds to glycans with terminal alpha-1,6 linked mannose on misfolded N-glycosylated proteins and participates in targeting proteins to ERAD; member of the OS-9 protein family
NP43	H4	YIL002W-A	0.00111067	YIL002W-A	CMI7	Cytosolic MIni protein of ~7 kDa	Putative protein of unknown function; identified by expression profiling and mass spectrometry
NP16	G4	YJR032W	0.00110931	YJR032W	CPR7	Cyclosporin-sensitive Proline Rotamase	Peptidyl-prolyl cis-trans isomerase (cyclophilin); catalyzes the cis-trans isomerization of peptide bonds N-terminal to proline residues; binds to Hsp82p and contributes to chaperone activity; plays a role in determining prion variants
NP27	B4	YDL237W	0.0011087	YDL237W	AIM6	Altered Inheritance rate of Mitochondria	Protein of unknown function; required for respiratory growth; YDL237W is not an essential gene
NP21	H6	YER107C	0.00110781	YER107C	GLE2	GLFG LEthal	RNA export factor associated with the nuclear pore complex (NPC); associates with NUP116p; required for polyadenylated RNA export but not for protein import; homologous to S. pombe Rae1p and human RAE1
NP38	D7	YKL114C	0.00110525	YKL114C	APN1	APurinic/apyrimidinic eNdonuclease	Major apurinic/apyrimidinic endonuclease; 3'-repair diesterase; involved in repair of DNA damage by oxidation and alkylating agents; also functions as a 3'-5' exonuclease to repair 7,8-dihydro-8-oxodeoxyguanosine; genetically interacts with NTG1 to maintain mitochondrial genome integrity
NP1	C11	YMR124W	0.0011044	YMR124W	EPO1	Endoplasmic reticulum POlarization	Protein involved in septin-ER tethering; interacts with ER membrane protein, Scs2p, and Shs1p, a septin ring component, at bud neck to create ER diffusion barrier; GFP-fusion protein localizes to the cell periphery, cytoplasm, bud, and bud neck; interacts with Crm1p in two-hybrid assay; YMR124W has a paralog, YLR031W, that arose from the whole genome duplication
NP41	G5	YML050W	0.00110393	YML050W	AIM32	Altered Inheritance rate of Mitochondria	Protein of unknown function; null mutant is viable and displays elevated frequency of mitochondrial genome loss
NP20	G11	YAL030W	0.00110382	YAL030W	SNC1	Suppressor of the Null allele of CAP	Vesicle membrane receptor protein (v-SNARE); involved in the fusion between Golgi-derived secretory vesicles with the plasma membrane; proposed to be involved in endocytosis; member of the synaptobrevin/VAMP family of R-type v-SNARE proteins; SNC1 has a paralog, SNC2, that arose from the whole genome duplication
NP36	B7	YOR196C	0.00110199	YOR196C	LIP5	LIPoic acid	Protein involved in biosynthesis of the coenzyme lipoic acid; has similarity to E. coli lipoic acid synthase
EP10	H10	YPL122C	0.00110123	YPL122C	TFB2	Transcription Factor B subunit 2	Subunit of TFIIH and nucleotide excision repair factor 3 complexes; involved in transcription initiation, required for nucleotide excision repair, similar to 52 kDa subunit of human TFIIH
NP15	B8	YPL140C	0.00109941	YPL140C	MKK2	Mitogen-activated Kinase Kinase	MAPKK involved in the protein kinase C signaling pathway; involved in control of cell integrity; upon activation by Bck1p phosphorylates downstream target, Slt2p; functionally redundant with Mkk1p; MKK2 has a paralog, MKK1, that arose from the whole genome duplication
NP2	A8	YER027C	0.00109819	YER027C	GAL83	GALactose metabolism	One of three possible beta-subunits of the Snf1 kinase complex; allows nuclear localization of the Snf1 kinase complex in the presence of a nonfermentable carbon source; necessary and sufficient for phosphorylation of the Mig2p transcription factor in response to alkaline stress; functionally redundant with SIP1 and SIP2 for the phosphorylation of Mig1p in response to glucose deprivation; contain…
NP15	D6	YPL107W	0.00109684	YPL107W	DPC25	Delta-Psi dependent mitochondrial import and Cleavage protein of ~25 kDa	Putative protein of unknown function; green fluorescent protein (GFP)-fusion protein localizes to mitochondria; YPL107W is not an essential gene
NP41	E10	YML070W	0.00109422	YML070W	DAK1	DihydroxyAcetone Kinase	Dihydroxyacetone kinase; required for detoxification of dihydroxyacetone (DHA); involved in stress adaptation
NP20	D9	YBL069W	0.00109249	YBL069W	AST1	ATPase STabilizing	Lipid raft associated protein; interacts with the plasma membrane ATPase Pma1p and has a role in its targeting to the plasma membrane by influencing its incorporation into lipid rafts; sometimes classified in the medium-chain dehydrogenase/reductases (MDRs) superfamily; AST1 has a paralog, AST2, that arose from the whole genome duplication
NP43	C4	YDL160C-A	0.00109197	YDL160C-A	MHF2	Mph1-associated Histone-Fold protein	Component of the heterotetrameric MHF histone-fold complex; in humans the MHF complex interacts with both DNA and Mph1p ortholog FANCM to stabilize and remodel blocked replication forks and repair damaged DNA; mhf2 srs2 double mutants are MMS hypersensitive; orthologous to human centromere constitutive-associated network (CCAN) subunit CENP-X, also known as MHF2
NP24	D10	YDR195W	0.00109097	YDR195W	REF2	RNA End Formation	RNA-binding protein; involved in the cleavage step of mRNA 3'-end formation prior to polyadenylation, and in snoRNA maturation; part of holo-CPF subcomplex APT, which associates with 3'-ends of snoRNA- and mRNA-encoding genes; putative regulatory subunit of type 1 protein phosphatase Glc7p, required for actomyosin ring formation, and for timely dephosphorylation and release of Bnr1p from the divi…
NP21	E11	YOL096C	0.00109062	YOL096C	COQ3	COenzyme Q	O-methyltransferase; catalyzes two different O-methylation steps in ubiquinone (Coenzyme Q) biosynthesis; component of a mitochondrial ubiquinone-synthesizing complex; phosphoprotein
NP5	E10	YIL159W	0.00108967	YIL159W	BNR1	BNi1 Related	Formin; nucleates the formation of linear actin filaments; involved in processes such as budding and mitotic spindle orientation which require the formation of polarized actin cables; activity is regulated by Hof1p and by the Bud14p-Kel1p-Kel2p complex; dephosphorylated and delocalized from the division site in a Glc7p/Ref2p-dependent manner; functionally redundant with BNI1
NP41	D8	YCL045C	0.00108854	YCL045C	EMC1	ER Membrane protein Complex	Member of conserved endoplasmic reticulum membrane complex; involved in efficient folding of proteins in the ER; null mutant displays induction of the unfolded protein response; interacts with Gal80p; homologous to worm H17B01.4/EMC-1, fly CG2943, and human KIAA0090
NP24	H3	YGL043W	0.00108847	YGL043W	DST1	DNA Strand Transfer	General transcription elongation factor TFIIS; enables RNA polymerase II to read through blocks to elongation by stimulating cleavage of nascent transcripts stalled at transcription arrest sites; maintains RNAPII elongation activity on ribosomal protein genes during conditions of transcriptional stress
NP41	E6	YMR067C	0.00108775	YMR067C	UBX4	UBiquitin regulatory X	UBX domain-containing protein that interacts with Cdc48p; involved in degradation of polyubiquitinated proteins via the ERAD (ER-associated degradation) pathway; modulates the Cdc48p-Nplp-Ufd1p AAA ATPase complex during its role in delivery of misfolded proteins to the proteasome; protein abundance increases in response to DNA replication stress
NP22	G12	YFR043C	0.00108707	YFR043C	IRC6	Increased Recombination Centers	Clathrin coat accessory factor; involved in clathrin-mediated vesicle trafficking; may function to link the AP-1 clathrin adaptor complex with the Rab GTPase Ypt31p; has structural similarity to G-proteins; mouse homolog Aagab (p34) functionally complements irc6 null mutation; null mutant displays increased levels of spontaneous Rad52p foci
NP24	B8	YBR076W	0.0010867	YBR076W	ECM8	ExtraCellular Mutant	Non-essential protein of unknown function
NP22	G1	YER039C-A	0.00108371	YER039C-A			Putative protein of unknown function; YER039C-A is not an essential gene
NP20	F10	YAL051W	0.00108137	YAL051W	OAF1	Oleate-Activated transcription Factor	Oleate-activated transcription factor; subunit of a heterodimeric complex with Pip2p, which binds to oleate-response elements (ORE) in the promoter of genes involved in beta-oxidation of fatty acids, peroxisome organization and biogenesis, activating transcription in the presence of oleate; regulates chromatin silencing at telomeres; involved in diauxic shift; OAF1 has a paralog, PIP2, that arose…
NP33	A5	YLR079W	0.00108081	YLR079W	SIC1	Substrate/Subunit Inhibitor of Cyclin-dependent protein kinase	Cyclin-dependent kinase inhibitor (CKI); inhibitor of Cdc28-Clb kinase complexes that controls G1/S phase transition, preventing premature S phase and ensuring genomic integrity; phosphorylated by Clb5/6-Cdk1 and Cln1/2-Cdk1 kinase which regulate timing of Sic1p degradation; phosphorylation targets Sic1p for SCF(CDC4)-dependent turnover; functional homolog of mammalian Kip1
NP21	B7	YAR031W	0.00108069	YAR031W	PRM9	Pheromone-Regulated Membrane protein	Pheromone-regulated protein; contains 3 predicted transmembrane segments and an FF sequence, a motif involved in COPII binding; member of DUP240 gene family; PRM9 has a paralog, PRM8, that arose from a segmental duplication
NP38	E9	YLL002W	0.00108068	YLL002W	RTT109	Regulator of Ty1 Transposition	Histone acetyltransferase; critical for cell survival in presence of DNA damage during S phase, required for recovery after DSB repair; acetylates H3K56, H3K9; H3K56 acetylation activity required for expression homeostasis, buffering of mRNA synthesis rate against changes in gene dosage during S phase; involved in non-homologous end joining and regulation of Ty1 transposition; prevents hyper-ampl…
NP41	C2	YJR059W	0.00107948	YJR059W	PTK2	Putative serine/Threonine protein Kinase	Serine/threonine protein kinase; involved in regulation of ion transport across plasma membrane; carboxyl terminus is essential for glucose-dependent Pma1p activation via phosphorylation of Pma1p-Ser899; enhances spermine uptake; PTK2 has a paralog, PTK1, that arose from the whole genome duplication
NP15	H7	YPL026C	0.00107784	YPL026C	SKS1	Suppressor Kinase of SNF3	Putative serine/threonine protein kinase; involved in the adaptation to low concentrations of glucose independent of the SNF3 regulated pathway; SKS1 has a paralog, VHS1, that arose from the whole genome duplication
NP9	F11	YHL008C	0.00107546	YHL008C			Putative protein of unknown function; may be involved in the uptake of chloride ions; does not appear to be involved in monocarboxylic acid transport; green fluorescent protein (GFP)-fusion protein localizes to the vacuole
NP24	F9	YGL004C	0.00107305	YGL004C	RPN14	Regulatory Particle Non-ATPase	Evolutionarily conserved 19S regulatory particle assembly-chaperone; proteasome-interacting protein involved in the assembly of the base subcomplex of the 19S proteasome regulatory particle (RP); null mutants accumulate ubiquitinated Gcn4p and display decreased 26S proteasome stability; interacts with Rpt5p
NP20	E11	YAL068C	0.00107175	YAL068C	PAU8	seriPAUperin	Protein of unknown function; member of the seripauperin multigene family encoded mainly in subtelomeric regions
NP43	E6	YGL119W	0.00107068	YGL119W	COQ8	COenzyme Q	ATPase required for ubiquinone biosynthesis and respiratory growth; maintains levels of CoQ biosynthetic proteins; binds to CoQ biosynthesis intermediates; UbiB protein kinase-like family member that lacks canonical protein kinase activity; similar to prokaryotic proteins involved in ubiquinone biosynthesis; human homolog ADCK3 complements a coq8 null, is associated with CoQ and respiratory-chain…
NP41	H4	YJR015W	0.00107059	YJR015W			Putative protein of unknown function; localizes to endoplasmic reticulum and cytoplasm; predicted to encode a membrane transporter based on phylogenetic analysis; not an essential gene; YJR015W has a paralog, SNG1, that arose from the whole genome duplication
NP23	F5	YBL102W	0.00107029	YBL102W	SFT2	Suppressor of sed Five Ts	Tetra-spanning membrane protein found mostly in the late Golgi; non-essential; can suppress some sed5 alleles; may be part of the transport machinery, but precise function is unknown; similar to mammalian syntaxin 5
NP20	H10	YAL017W	0.00106994	YAL017W	PSK1	Pas domain-containing Serine/threonine protein Kinase	PAS domain-containing serine/threonine protein kinase; coordinately regulates protein synthesis and carbohydrate metabolism and storage in response to a unknown metabolite that reflects nutritional status; PSK1 has a paralog, PSK2, that arose from the whole genome duplication
NP2	F10	YDR289C	0.00106826	YDR289C	RTT103	Regulator of Ty1 Transposition	Protein involved in transcription termination by RNA polymerase II; interacts with exonuclease Rat1p and Rai1p; has an RPR domain (carboxy-terminal domain interacting domain); also involved in regulation of Ty1 transposition

## Sheet: S5D) LOW instability hits
Plate	Well	ORF	Rate	Systematic name	Standard name	Gene summary	SGD Description
NP42	H4	YNL001W	-0.00310806	YNL001W	DOM34	Duplication Of Multilocus region	Protein that facilitates ribosomal subunit dissociation; Dom34-Hbs1 complex and Rli1p have roles in dissociating inactive ribosomes to facilitate translation restart, particularly ribosomes stalled in 3' UTRs; required for RNA cleavage in no-go decay, but reports conflict on endonuclease activity; Pelota ortholog; protein abundance increases in response to DNA replication stress; DOM34 has a para…
EP4	G5	YGR013W	-0.00164019	YGR013W	SNU71	Small NUclear ribonucleoprotein associated	Component of U1 snRNP required for mRNA splicing via spliceosome; yeast specific, no metazoan counterpart
NP40	C8	YJL080C	-0.00141646	YJL080C	SCP160	S. cerevisiae protein involved in the Control of Ploidy	Essential RNA-binding G protein effector of mating response pathway; ligand-activated RNA-binding protein that delivers RNAs involved in polarization and perpetualizing mating signal to shmoo tip during pheromone signaling; Scp160p-mediated RNA trafficking essential for chemotropism and successful mating; mainly associated with nuclear envelope and ER, interacts in mRNA-dependent manner with tran…
NP40	H3	YNL064C	-0.0009283	YNL064C	YDJ1	Yeast dnaJ	Type I HSP40 co-chaperone; involved in regulation of HSP90 and HSP70 functions; acts as an adaptor that helps Rsp5p recognize cytosolic misfolded proteins for ubiquitination after heat shock; critical for determining cell size at Start as a function of growth rate; involved in protein translocation across membranes; member of the DnaJ family; chimeric protein in which human p58IPK J domain replac…
NP42	D11	YGL250W	-0.000926441	YGL250W	RMR1	Reduced Meiotic Recombination	Protein required for meiotic recombination and gene conversion; null mutant displays reduced PIS1 expression and growth defects on non-fermentable carbon sources and minimal media; GFP-fusion protein localizes to both cytoplasm and nucleus
NP40	C2	YJL147C	-0.000828295	YJL147C	SMT1	Suppression of Mitochondrial Translation	Protein that associates with mitochondrial ribosome; homozygous diploid deletion strain has a sporulation defect characterized by elevated dityrosine in the soluble fraction; expression induced by calcium shortage; YJL147W is a non-essential gene
NP40	A2	YGL094C	-0.000825261	YGL094C	PAN2	Poly(A)-binding protein-dependent poly(A) riboNuclease	Catalytic subunit of the Pan2p-Pan3p poly(A)-ribonuclease complex; complex acts to control poly(A) tail length and regulate the stoichiometry and activity of postreplication repair complexes
NP40	B5	YJL197W	-0.000813613	YJL197W	UBP12	UBiquitin-specific Protease	Ubiquitin-specific protease; cleaves ubiquitin from ubiquitinated proteins; present in the nucleus and cytoplasm
NP40	B7	YJL186W	-0.000808126	YJL186W	MNN5	MaNNosyltransferase	Alpha-1,2-mannosyltransferase; responsible for addition of the second alpha-1,2-linked mannose of the branches on the mannan backbone of oligosaccharides, localizes to an early Golgi compartment
NP42	A10	YOR266W	-0.000805451	YOR266W	PNT1	PeNTamidine resistance	Mitochondrial integral inner membrane protein; involved in membrane insertion of C-terminus of Cox2p, interacts genetically and physically with Cox18p; deletion mutant sensitive to the anti-Pneumocystis carinii drug pentamidine
NP40	A3	YGL133W	-0.000746832	YGL133W	ITC1	Imitation switch Two Complex	Subunit of ATP-dependent Isw2p-Itc1p chromatin remodeling complex; required for repression of a-specific genes, repression of early meiotic genes during mitotic growth, and repression of INO1; similar to mammalian Acf1p, the regulatory subunit of the mammalian ATP-utilizing chromatin assembly and modifying factor (ACF) complex; ITC1 has a paralog, YPL216W, that arose from the whole genome duplica…
NP40	H8	YOR243C	-0.000732227	YOR243C	PUS7	PseudoUridine Synthase	Pseudouridine synthase; catalyzes pseudouridylation at positions 35 and 56 in U2 snRNA, position 50 in 5S rRNA, position 13 in cytoplasmic tRNAs, and position 35 in pre-tRNA(Tyr); also pseudouridylates some mRNAs; relocates from nucleus to cytoplasm during heat shock and differentially modifies some mRNAs during heat shock; conserved in archaea, vertebrates, and some bacteria
NP40	D2	YKL179C	-0.00070018	YKL179C	COY1	CASP Of Yeast	Golgi membrane protein with similarity to mammalian CASP; genetic interactions with GOS1 (encoding a Golgi snare protein) suggest a role in Golgi function
NP42	F11	YLR327C	-0.000697074	YLR327C	TMA10	Translation Machinery Associated	Protein of unknown function that associates with ribosomes; protein abundance increases in response to DNA replication stress; TMA10 has a paralog, STF2, that arose from the whole genome duplication
NP42	B7	YBR101C	-0.000639678	YBR101C	FES1	Factor Exchange for Ssa1p	Hsp70 (Ssa1p) nucleotide exchange factor; required for the release of misfolded proteins from the Hsp70 system to the Ub-proteasome machinery for destruction; cytosolic homolog of Sil1p, which is the nucleotide exchange factor for BiP (Kar2p) in the endoplasmic reticulum; protein abundance increases in response to DNA replication stress
EP4	E8	YGL123W	-0.000620677	YGL123W	RPS2	Ribosomal Protein of the Small subunit	Protein component of the small (40S) subunit; essential for control of translational accuracy; phosphorylation by C-terminal domain kinase I (CTDK-I) enhances translational accuracy; methylated on one or more arginine residues by Hmt1p; homologous to mammalian ribosomal protein S2 and bacterial S5
NP40	G6	YMR167W	-0.000611858	YMR167W	MLH1	MutL Homolog	Protein required for mismatch repair in mitosis and meiosis; also required for crossing over during meiosis; forms a complex with Pms1p and Msh2p-Msh3p during mismatch repair; human homolog is associated with hereditary non-polyposis colon cancer
NP40	F2	YLR187W	-0.000610552	YLR187W	SKG3	Suppressor of lethality of Kex2 Gas1 double null mutant	Protein of unknown function; green fluorescent protein (GFP)-fusion protein localizes to the cell periphery, cytoplasm, bud, and bud neck; potential Cdc28p substrate; similar to Skg4p; relocalizes from bud neck to cytoplasm upon DNA replication stress; SKG3 has a paralog, CAF120, that arose from the whole genome duplication
NP42	C5	YDR173C	-0.000609882	YDR173C	ARG82	ARGinine requiring	Inositol polyphosphate multikinase (IPMK); sequentially phosphorylates Ins(1,4,5)P3 to form Ins(1,3,4,5,6)P5; also has diphosphoinositol polyphosphate synthase activity; regulates arginine-, phosphate-, and nitrogen-responsive genes
NP40	D6	YKL185W	-0.00059076	YKL185W	ASH1	Asymmetric Synthesis of HO	Component of the Rpd3L histone deacetylase complex; zinc-finger inhibitor of HO transcription; mRNA is localized and translated in the distal tip of anaphase cells, resulting in accumulation of Ash1p in daughter cell nuclei and inhibition of HO expression; potential Cdc28p substrate
NP40	E9	YLR143W	-0.000590229	YLR143W	DPH6	DiPHthamide biosynthesis	Diphthamide synthetase; catalyzes the last amidation step of diphthamide biosynthesis using ammonium and ATP; evolutionarily conserved in eukaryotes; dph6 mutants exhibit diphthine accumulation and resistance to sordarin, which is indicative of defects in diphthamide formation on EF2; green fluorescent protein (GFP)-tagged protein localizes to the cytoplasm; DPH6/YLR143W is not an essential gene
NP40	A5	YHL027W	-0.000587841	YHL027W	RIM101	Regulator of IME2	Cys2His2 zinc-finger transcriptional repressor; involved in alkaline responsive gene repression as part of adaptation to alkaline conditions; involved in cell wall assembly; required for alkaline pH-stimulated haploid invasive growth and sporulation; activated by alkaline-dependent proteolytic processing which results in removal of the C-terminal tail; similar to A. nidulans PacC
NP40	H10	YOR246C	-0.00057878	YOR246C	ENV9	late ENdosome and Vacuole interface function	Protein proposed to be involved in vacuolar functions; mutant shows defect in CPY processing and defects in vacuolar morphology; has similarity to oxidoreductases, found in lipid particles; required for replication of Brome mosaic virus in S. cerevisiae, a model system for studying replication of positive-strand RNA viruses in their natural hosts
NP40	G4	YMR159C	-0.000567752	YMR159C	ATG16	AuTophaGy related	Conserved protein involved in autophagy; interacts with Atg12p-Atg5p conjugates to form Atg12p-Atg5p-Atg16p multimers, which binds to membranes and localizes to the pre-autophagosomal structure and are required for autophagy; relocalizes from nucleus to cytoplasmic foci upon DNA replication stress
NP42	B5	YBR041W	-0.000560715	YBR041W	FAT1	FATty acid transporter	Very long chain fatty acyl-CoA synthetase and fatty acid transporter; activates imported fatty acids with a preference for very long lengths (C20-C26); has a separate function in the transport of long chain fatty acids
NP40	F12	YLR367W	-0.000545954	YLR367W	RPS22B	Ribosomal Protein of the Small subunit	Protein component of the small (40S) ribosomal subunit; homologous to mammalian ribosomal protein S15A and bacterial S8; RPS22B has a paralog, RPS22A, that arose from the whole genome duplication
NP40	A8	YHR078W	-0.000542845	YHR078W			High osmolarity-regulated gene of unknown function
NP40	E7	YLR135W	-0.000517036	YLR135W	SLX4	Synthetic Lethal of unknown (X) function	Endonuclease involved in processing DNA; acts during recombination, repair; promotes template switching during break-induced replication (BIR), causing non-reciprocal translocations (NRTs); cleaves branched structures in complex with Slx1p; involved in interstrand cross-link repair, Rad1p/Rad10p-dependent removal of 3'-nonhomologous tails during DSBR via single-strand annealing; relative distribu…
NP42	D2	YFL034W	-0.000515789	YFL034W	MIL1	Medium adaptin-Interacting Ligand	Predicted lipase; binds variant medium clathrin chain Apm2p and contributes to its membrane recruitment; putative integral membrane protein that interacts with Rpp0p component of ribosomal stalk
NP42	C3	YDR092W	-0.000510751	YDR092W	UBC13	UBiquitin-Conjugating	E2 ubiquitin-conjugating enzyme; involved in the error-free DNA postreplication repair pathway; interacts with Mms2p to assemble ubiquitin chains at the Ub Lys-63 residue; DNA damage triggers redistribution from the cytoplasm to the nucleus
NP40	D3	YKL181W	-0.000498707	YKL181W	PRS1	PhosphoRibosylpyrophosphate Synthetase	5-phospho-ribosyl-1(alpha)-pyrophosphate synthetase; synthesizes PRPP, which is required for nucleotide, histidine, and tryptophan biosynthesis; plays a key role in cell wall integrity (CWI) pathway; one of five related enzymes, which are active as heteromultimeric complexes; missense mutations in human homolog PRPS1 are associated with neuropathic Arts syndrome and Charcot-Marie Tooth (CMTX5) di…
NP40	H5	YOR076C	-0.000491415	YOR076C	SKI7	SuperKIller	GTP-binding protein that couples the Ski complex and exosome; putative pseudo-translational GTPase involved in 3'-to-5' mRNA decay pathway; interacts with both the cytoplasmic exosome and the Ski complex; eRF3-like domain targets nonstop mRNA for degradation; null mutants have a superkiller phenotype; SKI7 has a paralog, HBS1, that arose from the whole genome duplication
NP40	F7	YLR240W	-0.000468967	YLR240W	VPS34	Vacuolar Protein Sorting	Phosphatidylinositol (PI) 3-kinase that synthesizes PI-3-phosphate; forms membrane-associated signal transduction complex with Vps15p to regulate protein sorting; activated by the GTP-bound form of Gpa1p; a fraction is localized, with Vps15p, to nuclear pores at nucleus-vacuole junctions and may facilitate transcription elongation for genes positioned at the nuclear periphery
NP40	D5	YKL184W	-0.000461345	YKL184W	SPE1	SPErmidine auxotroph	Ornithine decarboxylase; catalyzes the first step in polyamine biosynthesis; degraded in a proteasome-dependent manner in the presence of excess polyamines; deletion decreases lifespan, and increases necrotic cell death and ROS generation
NP40	G2	YLR414C	-0.000456088	YLR414C	PUN1	Plasma membrane protein Upregulated during Nitrogen stress	Plasma membrane protein with a role in cell wall integrity; co-localizes with Sur7p in punctate membrane patches; null mutant displays decreased thermotolerance; transcription induced upon cell wall damage and metal ion stress
NP40	F11	YLR319C	-0.000452243	YLR319C	BUD6	BUD site selection	Actin- and formin-interacting protein; participates in actin cable assembly and organization as a nucleation-promoting factor (NPF) for formins Bni1p and Bnr1p; a triple helical coiled-coil domain in the C-terminal region interacts with Bni1p; involved in polarized cell growth; isolated as bipolar budding mutant; potential Cdc28p substrate
EP4	C6	YGL018C	-0.000435218	YGL018C	JAC1	J-type Accessory Chaperone	Specialized J-protein that functions in Fe-S cluster biogenesis; functions with Hsp70 in Fe-S cluster biogenesis in mitochondria; involved in iron metabolism; contains a J domain typical to J-type chaperones; localizes to the mitochondrial matrix
NP40	F3	YLR189C	-0.000434731	YLR189C	ATG26	AuTophaGy related	UDP-glucose:sterol glucosyltransferase; conserved enzyme involved in synthesis of sterol glucoside membrane lipids; in contrast to ATG26 from P. pastoris, S. cerevisiae ATG26 is not involved in autophagy
NP40	A7	YHR073W	-0.000433247	YHR073W	OSH3	OxySterol binding protein Homolog	Member of an oxysterol-binding protein family; this family has seven members in S. cerevisiae; family members have overlapping, redundant functions in sterol metabolism and collectively perform a function essential for viability; contains FFAT motif; interacts with ER anchor Scs2p at patches at the plasma membrane; regulated by sterol binding
NP40	H2	YNL219C	-0.000433224	YNL219C	ALG9	Asparagine-Linked Glycosylation	Mannosyltransferase, involved in N-linked glycosylation; catalyzes the transfer of both the seventh mannose residue on B-arm and ninth mannose residue on the C-arm from Dol-P-Man to lipid-linked oligosaccharides; human homolog ALG9 can complement yeast null mutant; mutation of human homolog causes type 1 congenital disorders of glycosylation
NP40	C11	YKL157W	-0.000432352	YKL157W	APE2	AminoPEptidase	Aminopeptidase yscII; may have a role in obtaining leucine from dipeptide substrates; APE2 has a paralog, AAP1, that arose from the whole genome duplication
NP40	H6	YOR241W	-0.00043013	YOR241W	MET7	METhionine requiring	Folylpolyglutamate synthetase; catalyzes extension of the glutamate chains of the folate coenzymes, required for methionine synthesis and for maintenance of mitochondrial DNA; protein abundance increases in response to DNA replication stress
NP40	D9	YKL205W	-0.000404567	YKL205W	LOS1	Loss Of Suppression	Nuclear pore protein; involved in nuclear export of pre-tRNA and in re-export of mature tRNAs after their retrograde import from the cytoplasm; deletion mutation extends replicative lifespan, as does exclusion of Los1p from the nucleus in response to caloric restriction
EP6	E6	YJR017C	-0.000389284	YJR017C	ESS1	ESSential	Peptidylprolyl-cis/trans-isomerase (PPIase); specific for phosphorylated S/T residues N-terminal to proline; regulates phosphorylation of RNAPII large subunit (Rpo21p) C-terminal domain (CTD) at Ser7; associates with phospho-Ser5 form of RNAPII in vivo; present along entire coding length of genes; represses initiation of CUTs; required for efficient termination of mRNA transcription, trimethylati…
NP42	G5	YMR243C	-0.000384814	YMR243C	ZRC1	Zinc Resistance Conferring	Vacuolar membrane zinc transporter; transports zinc from cytosol to vacuole for storage; also has role in resistance to zinc shock resulting from sudden influx of zinc into cytoplasm; human ortholog SLC30A10 functions as a Mn transporter and mutations in SLC30A10 cause neurotoxic accumulation of Mn in liver and brain; ZRC1 has a paralog, COT1, that arose from the whole genome duplication
NP40	E1	YKR056W	-0.00037856	YKR056W	TRM2	tRNA Methyltransferase	tRNA methyltransferase; 5-methylates the uridine residue at position 54 of tRNAs and may also have a role in tRNA stabilization or maturation; endo-exonuclease with a role in DNA repair
NP40	G8	YMR190C	-0.000367348	YMR190C	SGS1	Slow Growth Suppressor	RecQ family nucleolar DNA helicase; role in genome integrity maintenance, chromosome synapsis, meiotic joint molecule/crossover formation; stimulates activity of Top3p; rapidly lost in response to rapamycin in Rrd1p-dependent manner; forms nuclear foci upon DNA replication stress; yeast SGS1 complements mutations in human homolog BLM implicated in Bloom syndrome; also similar to human WRN implica…
NP40	G12	YNL305C	-0.000363291	YNL305C	BXI1	BaX Inhibitor	Protein involved in apoptosis; variously described as containing a BCL-2 homology (BH3) domain or as a member of the BAX inhibitor family; reported to promote apoptosis under some conditions and to inhibit it in others; localizes to ER and vacuole; may link the unfolded protein response to apoptosis via regulation of calcium-mediated signaling; translocates to mitochondria under apoptosis-inducin…
NP40	C12	YKL174C	-0.000363198	YKL174C	TPO5	Transporter of POlyamines	Protein involved in excretion of putrescine and spermidine; putative polyamine transporter in the Golgi or post-Golgi vesicles
NP40	G7	YMR176W	-0.000357597	YMR176W	ECM5	ExtraCellular Mutant	Subunit of the Snt2C complex; physically associates with Snt2p and Rpd3p; along with Snt2p, recruits Rpd3p to a small number of promoters; also colocalizes with Snt2p, independently of Rpd3p, to promoters of stress response genes in response to oxidative stress; contains ATP/GTP-binding site motif A; null mutant exhibits increased cellular volume, large drooping buds with elongated necks; relativ…
NP40	A9	YHR079C	-0.000352875	YHR079C	IRE1	Inositol REquiring	Serine-threonine kinase and endoribonuclease; transmembrane protein that mediates the unfolded protein response (UPR) by regulating Hac1p synthesis through HAC1 mRNA splicing; role in homeostatic adaptation to ER stress; Kar2p binds inactive Ire1p and releases from it upon ER stress
NP40	D1	YKL175W	-0.000352028	YKL175W	ZRT3	Zinc-Regulated Transporter	Vacuolar membrane zinc transporter; transports zinc from storage in the vacuole to the cytoplasm when needed; transcription is induced under conditions of zinc deficiency
NP40	C3	YJL138C	-0.000345867	YJL138C	TIF2	Translation Initiation Factor	Translation initiation factor eIF4A; DEA(D/H)-box RNA helicase that couples ATPase activity to RNA binding and unwinding; forms a dumbbell structure of two compact domains connected by a linker; interacts with eIF4G; protein abundance increases in response to DNA replication stress; TIF2 has a paralog, TIF1, that arose from the whole genome duplication
NP40	E2	YKR064W	-0.000345608	YKR064W	OAF3	Oleate Activated transcription Factor	Putative transcriptional repressor with Zn(2)-Cys(6) finger; negatively regulates transcription in response to oleate levels, based on mutant phenotype and localization to oleate-responsive promoters; the authentic, non-tagged protein is detected in highly purified mitochondria in high-throughput studies; forms nuclear foci upon DNA replication stress
NP40	C7	YJL084C	-0.000345012	YJL084C	ALY2	Arrestin-Like Yeast protein	Alpha arrestin; controls nutrient-mediated intracellular sorting of permease Gap1p; interacts with AP-1 subunit Apl4p; phosphorylated by Npr1p and also by cyclin-CDK complex Pcl7p-Pho85p; promotes endocytosis of plasma membrane proteins; ALY2 has a paralog, ALY1, that arose from the whole genome duplication
NP40	C9	YKL015W	-0.000343477	YKL015W	PUT3	Proline UTilization	Transcriptional activator; binds specific gene recruitment sequences and is required for DNA zip code-mediated targeting of genes to nuclear periphery; regulates proline utilization genes, constitutively binds PUT1 and PUT2 promoters as a dimer, undergoes conformational change to form active state; binds other promoters only under activating conditions; differentially phosphorylated in presence o…
EP4	D6	YGL075C	-0.00033173	YGL075C	MPS2	MonoPolar Spindle	Essential membrane protein localized at nuclear envelope and SPBs; required for insertion of the newly duplicated spindle pole body into the nuclear envelope; potentially phosphorylated by Cdc28p; MPS2 has a paralog, CSM4, that arose from the whole genome duplication
NP40	G3	YLR415C	-0.000328979	YLR415C			Putative protein of unknown function; YLR415C is not an essential gene
NP40	A1	YGL086W	-0.000323359	YGL086W	MAD1	Mitotic Arrest-Deficient	Coiled-coil protein involved in spindle-assembly checkpoint; required for inhibition of karyopherin/importin Pse1p (aka Kap121p) upon spindle assembly checkpoint arrest; phosphorylated by Mps1p upon checkpoint activation which leads to inhibition of anaphase promoting complex activity; forms a complex with Mad2p; gene dosage imbalance between MAD1 and MAD2 leads to chromosome instability
NP40	A6	YHL026C	-0.000323057	YHL026C			Putative protein of unknown function; transcriptionally regulated by Upc2p via an upstream sterol response element; SWAT-GFP fusion protein localizes to the cell periphery, while mCherry fusion localizes to both the cell periphery and vacuole; YHL026C is not an essential gene; in 2005 the start site was moved 141 nt upstream (see Locus History)
NP42	B12	YDL057W	-0.000321485	YDL057W			Putative protein of unknown function; YDL057W is not an essential gene
NP40	C10	YKL105C	-0.000308257	YKL105C	SEG2	Stability of Eisosomes Guaranteed	Eisosome component; likely plays only a minor role in eisosome assembly; shown to interact with Seg1p by affinity purification and mass spec; SWAT-GFP and mCherry fusion proteins localize to the cell periphery; similar to <i>A. gossypii</i> SEG gene which is important for stabilizing eisosomes; SEG2 has a paralog, SEG1, that arose from the whole genome duplication
EP8	B9	YLR378C	-0.000301079	YLR378C	SEC61	SECretory	Conserved ER protein translocation channel; essential subunit of Sec61 complex (Sec61p, Sbh1p, and Sss1p); forms channel for SRP-dependent protein import; with Sec63 complex allows SRP-independent protein import into ER; involved in posttranslational soluble protein import into the ER, ERAD of soluble substrates, and misfolded soluble protein export from the ER
NP40	F4	YLR207W	-0.000295162	YLR207W	HRD3	HMG-coA Reductase Degradation	ER membrane protein that plays a central role in ERAD; forms HRD complex with Hrd1p and ER-associated protein degradation (ERAD) determinants that engages in lumen to cytosol communication and coordination of ERAD events
NP40	G5	YMR166C	-0.000294715	YMR166C	MME1	Mitochondrial Magnesium Exporter	Transporter of the mitochondrial inner membrane that exports magnesium; involved in mitochondrial Mg2+ homeostasis; has similarity to human mitochondrial ATP-Mg/Pi carriers
NP42	B11	YDL025C	-0.000293873	YDL025C	RTK1	Ribosome biogenesis and TRNA synthetase-associated Kinase	Putative protein kinase, potentially phosphorylated by Cdc28p; interacts with ribosome biogenesis factors, Cka2, Gus1 and Arc1; protein abundance increases in response to DNA replication stress
NP40	A11	YHR155W	-0.000290982	YHR155W	LAM1	Lipid transfer protein Anchored at Membrane contact sites	Putative sterol transfer protein; localizes to puncta in the cortical ER; probable role in retrograde transport of sterols from the plasma membrane to the ER; one of six StART-like domain-containing proteins in yeast that may be involved in sterol transfer between intracellular membranes; conserved across eukaryotes; contains GRAM, StART-like (VASt) and two PH-like domains
NP40	E10	YLR144C	-0.000288855	YLR144C	ACF2	Assembly Complementing Factor	Intracellular beta-1,3-endoglucanase; expression is induced during sporulation; may have a role in cortical actin cytoskeleton assembly; protein abundance increases in response to DNA replication stress
NP40	D11	YKR021W	-0.000288192	YKR021W	ALY1	Arrestin-Like Yeast protein	Alpha arrestin, substrate of calcineurin; controls nutrient-mediated intracellular sorting of permease Gap1p; interacts with AP-1 subunit Apl4p; dephosphorylation of Aly1p required for the endocytosis of Dip5p; may regulate endocytosis of plasma membrane proteins by recruiting ubiquitin ligase Rsp5p to plasma membrane targets; ALY1 has a paralog, ALY2, that arose from the whole genome duplication
NP4	A3	YDR386W	-0.000286961	YDR386W	MUS81	MMS and UV Sensitive	Subunit of structure-specific Mms4p-Mus81p endonuclease; cleaves branched DNA; involved in DNA repair, replication fork stability, and joint molecule formation/resolution during meiotic recombination; promotes template switching during break-induced replication (BIR), causing non-reciprocal translocations (NRTs); helix-hairpin-helix protein; phosphorylation of non-catalytic subunit Mms4p by Cdc28…
NP40	C1	YJL149W	-0.000285733	YJL149W	DAS1	Dst1-delta 6-Azauracil Sensitivity	Putative SCF ubiquitin ligase F-box protein; interacts physically with both Cdc53p and Skp1 and genetically with CDC34; similar to putative F-box protein YDR131C
NP40	B6	YJL193W	-0.000283551	YJL193W			Putative protein of unknown function; predicted to encode a triose phosphate transporter subfamily member based on phylogenetic analysis; similar to YOR307C/SLY41; deletion mutant has a respiratory growth defect
NP40	C4	YJL134W	-0.000279404	YJL134W	LCB3	Long-Chain Base	Long-chain base-1-phosphate phosphatase; specific for dihydrosphingosine-1-phosphate, regulates ceramide and long-chain base phosphates levels, involved in incorporation of exogenous long chain bases in sphingolipids; LCB3 has a paralog, YSR3, that arose from the whole genome duplication
NP40	B8	YJL181W	-0.000271761	YJL181W	RBH1	Ran Binding domain Homolog	Putative protein of unknown function; expression is cell-cycle regulated as shown by microarray analysis; potential regulatory target of Mbp1p, which binds to the YJL181W promoter region; contains a PH-like domain; RBH1 has a paralog, RBH2, that arose from the whole genome duplication
NP42	D12	YGR026W	-0.000261611	YGR026W			Putative protein of unknown function; green fluorescent protein (GFP)-fusion protein localizes to the cell periphery
NP40	E3	YLL038C	-0.000256216	YLL038C	ENT4	Epsin N-Terminal homology	Protein of unknown function; contains an N-terminal epsin-like domain; proposed to be involved in the trafficking of Arn1p in the absence of ferrichrome
NP40	D10	YKR009C	-0.000250392	YKR009C	FOX2	Fatty acid OXidation	3-hydroxyacyl-CoA dehydrogenase and enoyl-CoA hydratase; multifunctional enzyme of the peroxisomal fatty acid beta-oxidation pathway; mutation is functionally complemented by human HSD17B4
NP40	E8	YLR138W	-0.000243095	YLR138W	NHA1	Na+/H+ Antiporter	Na+/H+ antiporter; involved in sodium and potassium efflux through the plasma membrane; required for alkali cation tolerance at acidic pH
NP42	C7	YDR315C	-0.00023994	YDR315C	IPK1	Inositol Polyphosphate Kinase	Inositol 1,3,4,5,6-pentakisphosphate 2-kinase; nuclear protein required for synthesis of 1,2,3,4,5,6-hexakisphosphate (phytate), which is integral to cell function; has 2 motifs conserved in other fungi; ipk1 gle1 double mutant is inviable; human IPPK can complement ipk1 null mutant
NP40	G1	YLR413W	-0.000234314	YLR413W	INA1	INdicator of Abscission	Protein of unknown function; not an essential gene; YLR413W has a paralog, FAT3, that arose from the whole genome duplication
NP40	F10	YLR318W	-0.000230277	YLR318W	EST2	Ever Shorter Telomeres	Reverse transcriptase subunit of the telomerase holoenzyme; essential for telomerase core catalytic activity, involved in other aspects of telomerase assembly and function; mutations in human homolog are associated with aplastic anemia
NP40	B4	YJL198W	-0.000229101	YJL198W	PHO90	PHOsphate metabolism	Low-affinity phosphate transporter; acts upstream of Pho81p in regulation of the PHO pathway; deletion of pho84, pho87, pho89, pho90, and pho91 causes synthetic lethality; transcription independent of Pi and Pho4p activity; overexpression results in vigorous growth; PHO90 has a paralog, PHO87, that arose from the whole genome duplication
NP42	C8	YDR374C	-0.000227126	YDR374C	PHO92	PHOsphate metabolism	Posttranscriptional regulator of phosphate metabolism; facilitates PHO4 mRNA degradation by interacting with Pop2p; regulates PHO4 mRNA stability by binding to PHO4's 3'UTR in a phosphate-dependent manner; contains highly conserved YTH (YT521-B Homology) domain that exhibits RNA-binding activity; human homolog YTHDF2 can complement yeast null mutant
NP40	A10	YHR154W	-0.000216561	YHR154W	RTT107	Regulator of Ty1 Transposition	Protein implicated in Mms22-dependent DNA repair during S phase; involved in recruiting the SMC5/6 complex to double-strand breaks; DNA damage induces phosphorylation by Mec1p at one or more SQ/TQ motifs; interacts with Mms22p and Slx4p; has four BRCT domains; has a role in regulation of Ty1 transposition; relative distribution to nuclear foci increases upon DNA replication stress
NP40	B10	YJL157C	-0.000211835	YJL157C	FAR1	Factor ARrest	CDK inhibitor and nuclear anchor; during the cell cycle Far1p sequesters the GEF Cdc24p in the nucleus; phosphorylation by Cdc28p-Cln results in SCFCdc4 complex-mediated ubiquitin-dependent degradation, releasing Cdc24p for export and activation of GTPase Cdc42p; in response to pheromone, phosphorylation of Far1p by MAPK Fus3p results in association with, and inhibition of Cdc28p-Cln, as well as …
NP40	E12	YLR176C	-0.000207305	YLR176C	RFX1	Regulatory Factor X	Major transcriptional repressor of DNA-damage-regulated genes; recruits repressors Tup1p and Cyc8p to their promoters; involved in DNA damage and replication checkpoint pathway; similar to a family of mammalian DNA binding RFX1-4 proteins
EP4	C5	YGL011C	-0.000202984	YGL011C	SCL1	Suppressor of Crl3 ts Lethality	Alpha 1 subunit of the 20S proteasome; involved in the degradation of ubiquitinated substrates; 20S proteasome is the core complex of the 26S proteasome; essential for growth; detected in the mitochondria
NP40	H9	YOR245C	-0.000184473	YOR245C	DGA1	DiacylGlycerol Acyltransferase	Diacylglycerol acyltransferase; catalyzes the terminal step of triacylglycerol (TAG) formation, acylates diacylglycerol using acyl-CoA as an acyl donor; Lro1p and Dga1p can O-acylate ceramides; localized to lipid particles
NP40	B11	YJL154C	-0.000181624	YJL154C	VPS35	Vacuolar Protein Sorting	Endosomal subunit of membrane-associated retromer complex; required for retrograde transport; receptor that recognizes retrieval signals on cargo proteins, forms subcomplex with Vps26p and Vps29p that selects cargo proteins for retrieval; interacts with Ypt7p; overexpression of wild-type human VPS35 or Parkinson's-associated vps35-D686N or vps35-P299S variants complements Ni2+ resistance and Cd2+…
NP40	H1	YNL236W	-0.000179827	YNL236W	SIN4	Switch INdependent	Subunit of the RNA polymerase II mediator complex; associates with core polymerase subunits to form the RNA polymerase II holoenzyme; contributes to both postive and negative transcriptional regulation; dispensible for basal transcription
NP40	G10	YMR215W	-0.000171105	YMR215W	GAS3	Glycophospholipid-Anchored Surface protein	Putative 1,3-beta-glucanosyltransferase; has similarity go other GAS family members; low abundance, possibly inactive member of the GAS family of GPI-containing proteins; localizes to the cell wall; mRNA induced during sporulation
NP40	F1	YLR182W	-0.000159586	YLR182W	SWI6	SWItching deficient	Transcription cofactor; forms complexes with Swi4p and Mbp1p to regulate transcription at the G1/S transition; involved in meiotic gene expression; also binds Stb1p to regulate transcription at START; cell wall stress induces phosphorylation by Mpk1p, which regulates Swi6p localization; required for the unfolded protein response, independently of its known transcriptional coactivators
NP42	F10	YLR295C	-0.000159267	YLR295C	ATP14	ATP synthase	Subunit h of the F0 sector of mitochondrial F1F0 ATP synthase; F1F0 ATP synthase is a large, evolutionarily conserved enzyme complex required for ATP synthesis; protein abundance increases in response to DNA replication stress
NP40	G11	YMR216C	-0.000155718	YMR216C	SKY1	SRPK1-like Kinase in Yeast	SR protein kinase (SRPK); involved in regulating proteins involved in mRNA metabolism and cation homeostasis; similar to human SRPK1
NP42	A12	YPR091C	-0.000155383	YPR091C	NVJ2	Nucleus-Vacuole Junction	Lipid-binding ER protein, enriched at nucleus-vacuolar junctions (NVJ); may be involved in sterol metabolism or signaling at the NVJ; contains a synaptotagmin-like-mitochondrial-lipid binding protein (SMP) domain; binds phosphatidylinositols and other lipids in a large-scale study; may interact with ribosomes, based on co-purification experiments
NP40	B9	YJL168C	-0.000150455	YJL168C	SET2	SET domain-containing	Histone methyltransferase with a role in transcriptional elongation; methylates H3 lysine 36 (H3K36), which suppresses incorporation of acetylated histones and signals for the deacetylation of these histones within transcribed genes; associates with the C-terminal domain(CTD) of Rpo21p; H3K36me3 (trimethylation) requires Spt6p, proline 38 on H3, CTD of Rpo21p, Ctk1p, and C-terminal SRI domain of …
NP42	C4	YDR158W	-0.000147833	YDR158W	HOM2	HOMoserine requiring	Aspartic beta semi-aldehyde dehydrogenase; catalyzes the second step in the common pathway for methionine and threonine biosynthesis; expression regulated by Gcn4p and the general control of amino acid synthesis
NP6	E3	YDR123C	-0.000133491	YDR123C	INO2	INOsitol requiring	Transcription factor; component of the heteromeric Ino2p/Ino4p basic helix-loop-helix transcription activator that binds inositol/choline-responsive elements (ICREs), required for derepression of phospholipid biosynthetic genes in response to inositol depletion; involved in diauxic shift
EP4	G12	YGR060W	-0.000133367	YGR060W	ERG25	ERGosterol biosynthesis	C-4 methyl sterol oxidase; catalyzes the first of three steps required to remove two C-4 methyl groups from an intermediate in ergosterol biosynthesis; mutants accumulate the sterol intermediate 4,4-dimethylzymosterol; human MSMO1 functionally complements the growth defect caused by repression of ERG25 expression
NP42	A4	YJL105W	-0.000132963	YJL105W	SET4	SET domain-containing	Protein of unknown function, contains a SET domain; SET4 has a paralog, SET3, that arose from the whole genome duplication
NP42	A11	YOR269W	-0.000131869	YOR269W	PAC1	Perish in the Absence of Cin8p	Involved in nuclear migration, part of the dynein/dynactin pathway; targets dynein to microtubule tips, which is necessary for sliding of microtubules along bud cortex; serves at interface between dynein's ATPase site and its microtubule binding stalk, causing individual dynein motors to remain attached to microtubules for long periods; synthetic lethal with bni1; homolog of human LIS1, mutations…
NP42	A1	YJL163C	-0.000129	YJL163C			Putative protein of unknown function
NP42	D4	YFR014C	-0.000125424	YFR014C	CMK1	CalModulin dependent protein Kinase	Calmodulin-dependent protein kinase; may play a role in stress response, many Ca++/calmodulin dependent phosphorylation substrates demonstrated in vitro, amino acid sequence similar to mammalian Cam Kinase II; CMK1 has a paralog, CMK2, that arose from the whole genome duplication
NP40	B3	YJL209W	-0.000124013	YJL209W	CBP1	Cytochrome B mRNA Processing	Mitochondrial protein, regulator of COB mRNA stability and translation; interacts with the 5'-untranslated region of the COB mRNA; found in a complex at the inner membrane along with Pet309p; localizes to mitochondrial foci upon DNA replication stress
EP4	A10	YFL037W	-0.000123156	YFL037W	TUB2	TUBulin	Beta-tubulin; associates with alpha-tubulin (Tub1p and Tub3p) to form tubulin dimer, which polymerizes to form microtubules; mutation in human ortholog is associated with congenital fibrosis of the extraocular muscles (CFEOM) with polymicrogyria
NP42	G6	YNL332W	-0.00012308	YNL332W	THI12	THIamine metabolism	Protein involved in synthesis of the thiamine precursor HMP; member of a subtelomeric gene family including THI5, THI11, THI12, and THI13; hydroxymethylpyrimidine is also known as HMP
NP40	B12	YJL153C	-0.000116801	YJL153C	INO1	INOsitol requiring	Inositol-3-phosphate synthase; involved in synthesis of inositol phosphates and inositol-containing phospholipids; transcription is coregulated with other phospholipid biosynthetic genes by Ino2p and Ino4p, which bind the UASINO DNA element
NP40	D12	YKR026C	-0.00011086	YKR026C	GCN3	General Control Nonderepressible	Alpha subunit of translation initiation factor eIF2B; guanine-nucleotide exchange factor for eIF2; activity subsequently regulated by phosphorylated eIF2; positive regulator of GCN4 expression; assembles into filaments with Gcd2p, Gcd6p, Gcd7p, and Sui2p as cells approach stationary phase and under cytosolic acidification and starvation conditions; human homolog EIF2B1 can complement yeast null m…
NP40	B1	YIL047C	-0.000108983	YIL047C	SYG1	Suppressor of Yeast Gpa1	Plasma membrane protein of unknown function; truncation and overexpression suppresses lethality of G-alpha protein deficiency
NP42	G4	YMR242C	-0.000107591	YMR242C	RPL20A	Ribosomal Protein of the Large subunit	Ribosomal 60S subunit protein L20A; homologous to mammalian ribosomal protein L18A, no bacterial homolog; RPL20A has a paralog, RPL20B, that arose from the whole genome duplication
NP40	D8	YKL197C	-0.000106871	YKL197C	PEX1	PEroXin	AAA-peroxin; heterodimerizes with AAA-peroxin Pex6p and participates in the recycling of peroxisomal signal receptor Pex5p from the peroxisomal membrane to the cystosol; induced by oleic acid and upregulated during anaerobiosis; mutations in human PEX1 can lead to severe peroxisomal disorders and early death
NP40	H11	YOR247W	-0.000103532	YOR247W	SRL1	Suppressor of Rad53 null Lethality	Mannoprotein that exhibits a tight association with the cell wall; required for cell wall stability in the absence of GPI-anchored mannoproteins; has a high serine-threonine content; expression is induced in cell wall mutants; SRL1 has a paralog, SVS1, that arose from the whole genome duplication
NP42	B8	YBR163W	-0.000101027	YBR163W	EXO5	EXOnuclease V	Mitochondrial 5'-3' exonuclease and sliding exonuclease; required for mitochondrial genome maintenance; distantly related to the RecB nuclease domain of bacterial RecBCD recombinases; may be regulated by the transcription factor Ace2
NP40	H7	YOR242C	-9.95257e-05	YOR242C	SSP2	Sporulation SPecific	Sporulation specific protein that localizes to the spore wall; required for sporulation at a point after meiosis II and during spore wall formation; expression controlled by a tightly regulated middle-meiotic promoter that is activated by Ndt80p; translation of SSP2 mRNA is delayed, such that the mRNA is present as nuclear divisions are taking place but is not engaged by ribosomes until relativel…
NP6	G11	YFR009W	-9.3328e-05	YFR009W	GCN20	General Control Nonderepressible	Positive regulator of the Gcn2p kinase activity; forms a complex with Gcn1p; proposed to stimulate Gcn2p activation by an uncharged tRNA
EP4	B6	YFR027W	-8.58565e-05	YFR027W	ECO1	Establishment of COhesion	Acetyltransferase; required for establishment of sister chromatid cohesion; acetylates Mps3p to regulate nuclear organization; modifies Smc3p at replication forks and Mcd1p in response to dsDNA breaks; phosphorylated by three kinases (Cdc28p, Cdc7p, Mck1p) to generate pair of phosphates spaced precisely for recognition by ubiquitin ligase SCF-Cdc4; mutations in human homolog ESCO2 cause Roberts s…
NP40	E5	YLR451W	-8.0909e-05	YLR451W	LEU3	LEUcine biosynthesis	Zinc-knuckle transcription factor, repressor and activator; regulates genes involved in branched chain amino acid biosynthesis and ammonia assimilation; acts as a repressor in leucine-replete conditions and as an activator in the presence of alpha-isopropylmalate, an intermediate in leucine biosynthesis that accumulates during leucine starvation
EP8	G7	YMR208W	-8.04688e-05	YMR208W	ERG12	ERGosterol biosynthesis	Mevalonate kinase; acts in the biosynthesis of isoprenoids and sterols, including ergosterol, from mevalonate; human MVK functionally complements the lethality of the erg12 null mutation
NP39	D3	YJL132W	-7.95881e-05	YJL132W			Putative protein of unknown function; localizes to the membrane fraction; possible Zap1p-regulated target gene induced by zinc deficiency; YJL132W is a non-essential gene
NP40	H4	YNL054W	-5.83966e-05	YNL054W	VAC7	VACuolar segregation	Integral vacuolar membrane protein; involved in vacuole inheritance and morphology; activates Fab1p kinase activity under basal conditions and also after hyperosmotic shock
NP40	A12	YHR158C	-4.899e-05	YHR158C	KEL1	KELch repeat	Protein required for proper cell fusion and cell morphology; forms a complex with Bud14p and Kel2p that regulates Bnr1p (formin) to affect actin cable assembly, cytokinesis, and polarized growth; functions in a complex with Kel2p to negatively regulate mitotic exit, interacts with Tem1p and Lte1p; localizes to regions of polarized growth; potential Cdc28p substrate
NP7	D5	YKL041W	-4.22145e-05	YKL041W	VPS24	Vacuolar Protein Sorting	One of four subunits of the ESCRT-III complex; forms an endosomal sorting complex required for transport III (ESCRT-III) subcomplex with Did4p; involved in the sorting of transmembrane proteins into the multivesicular body (MVB) pathway
EP4	C1	YFR051C	-1.4821e-05	YFR051C	RET2	RETrieval from ER	Delta subunit of the coatomer complex (COPI); COPI coats Golgi-derived transport vesicles; involved in retrograde transport between Golgi and ER
NP42	F8	YLR065C	-1.29546e-05	YLR065C	SND2	SRP-iNDependent targeting	Protein involved in SRP-independent targeting of substrates to the ER; component of an alternative ER targeting pathway that has partial functional redundancy with the GET pathway; preference for substrates with downstream transmembrane domains; interacts with Snd1p, Pho88p/Snd3p, and Sec61p-translocon subunits; can compensate for loss of SRP; role in the late endosome-vacuole interface; putative…
NP42	C9	YDR375C	0	YDR375C	BCS1	ubiquinol-cytochrome c reductase (bc1) Synthesis	Protein translocase and chaperone required for Complex III assembly; member of the AAA ATPase family; forms a homo-oligomeric complex in the mitochondrial inner membrane that translocates the C-terminal domain of Rip1p from the matrix across the inner membrane and delivers it to an assembly intermediate of respiratory Complex III; also required for assembly of the Qcr10p subunit; mutation is func…
NP18	H1	YEL060C	0	YEL060C	PRB1	PRoteinase B	Vacuolar proteinase B (yscB) with H3 N-terminal endopeptidase activity; serine protease of the subtilisin family; involved in protein degradation in the vacuole and required for full protein degradation during sporulation; activity inhibited by Pbi2p; protein abundance increases in response to DNA replication stress; PRB1 has a paralog, YSP3, that arose from the whole genome duplication
NP44	G2	YHR091C	0	YHR091C	MSR1	Mitochondrial tRNA Synthetase aRginine	Mitochondrial arginyl-tRNA synthetase; mutations in human ortholog are associated with pontocerebellar hypoplasia type 6; MSR1 has a paralog, YDR341C, that arose from the whole genome duplication
NP40	B2	YJL212C	0	YJL212C	OPT1	OligoPeptide Transporter	Proton-coupled oligopeptide transporter of the plasma membrane; also transports glutathione and phytochelatin; member of the OPT family
NP42	G7	YNL307C	1.36257e-05	YNL307C	MCK1	Meiosis and Centromere regulatory Kinase	Dual-specificity ser/thr and tyrosine protein kinase; roles in chromosome segregation, meiotic entry, genome stability, phosphorylation-dependent protein degradation (Rcn1p and Cdc6p), inhibition of protein kinase A, transcriptional regulation, inhibition of RNA pol III, calcium stress and inhibition of Clb2p-Cdc28p after nuclear division; MCK1 has a paralog, YGK3, that arose from the whole genom…
EP4	H2	YGR074W	1.38181e-05	YGR074W	SMD1	snRNA Sm binding site protein D1	Core Sm protein Sm D1; part of heteroheptameric complex (with Smb1p, Smd2p, Smd3p, Sme1p, Smx3p, and Smx2p) that is part of the spliceosomal U1, U2, U4, and U5 snRNPs; relocalizes to the cytosol in response to hypoxia; homolog of human Sm D1; protein abundance increases in response to DNA replication stress
EP4	E10	YGL130W	1.39282e-05	YGL130W	CEG1	Capping Enzyme Guanylyltransferase	Guanylyltransferase involved in mRNA 5' capping; subunit of mRNA capping enzyme, which is a heterotetramer composed of two molecules of Ceg1p and a homodimer of Cet1p, the mRNA 5'-triphosphatase subunit; nuclear import of Ceg1p requires interaction with Cet1p; mammalian capping enzyme is a single bifunctional polypeptide; human homolog RNGTT can complement yeast ceg1 null mutant
EP8	H7	YMR268C	1.49008e-05	YMR268C	PRP24	Pre-mRNA Processing	Splicing factor that reanneals snRNPs during spliceosome recycling; reanneals U4 and U6 snRNPs
NP40	E6	YLR131C	1.62977e-05	YLR131C	ACE2	Activator of CUP1 Expression	Transcription factor required for septum destruction after cytokinesis; phosphorylation by Cbk1p blocks nuclear exit during M/G1 transition, causing localization to daughter cell nuclei, and also increases Ace2p activity; phosphorylation by Cdc28p and Pho85p prevents nuclear import during cell cycle phases other than cytokinesis; part of RAM network that regulates cellular polarity and morphogene…
EP2	G9	YDR177W	1.84549e-05	YDR177W	UBC1	UBiquitin-Conjugating	Ubiquitin-conjugating enzyme; key E2 partner with Ubc4p for the anaphase-promoting complex (APC); mediates selective degradation of short-lived and abnormal proteins; plays a role in vesicle biogenesis and ER-associated protein degradation (ERAD); component of the cellular stress response; protein abundance increases in response to DNA replication stress key E2 partner with Ubc4p for the anaphase…
NP18	C2	YNL056W	2.04429e-05	YNL056W	OCA2	Oxidant-induced Cell cycle Arrest	Protein of unknown function; similar to predicted tyrosine phosphatases Oca1p and Siw14p; green fluorescent protein (GFP)-fusion protein localizes to the cytoplasm; YNL056W is not an essential gene
NP18	F5	YEL027W	2.08473e-05	YEL027W	VMA3	Vacuolar Membrane Atpase	Proteolipid subunit c of the V0 domain of vacuolar H(+)-ATPase; dicyclohexylcarbodiimide binding subunit; required for vacuolar acidification and important for copper and iron metal ion homeostasis
NP7	B11	YJR152W	2.28173e-05	YJR152W	DAL5	Degradation of Allantoin	Allantoate permease; ureidosuccinate permease; also transports dipeptides, though with lower affinity than for allantoate and ureidosuccinate; expression is constitutive but sensitive to nitrogen catabolite repression
EP7	F7	YLR088W	2.58094e-05	YLR088W	GAA1	GPI Anchor Attachment	Subunit of the GPI:protein transamidase complex; removes the GPI-anchoring signal and attaches GPI (glycosylphosphatidylinositol) to proteins in the ER; human homolog GPAA1 can complement growth defects of yeast thermosensitive mutant at restrictive temperature
NP42	H6	YNR014W	2.81987e-05	YNR014W			Putative protein of unknown function; expression is cell-cycle regulated, Azf1p-dependent, and heat-inducible; YNR014W has a paralog, YMR206W, that arose from the whole genome duplication
NP40	F5	YLR219W	3.03988e-05	YLR219W	MSC3	Meiotic Sister-Chromatid recombination	Protein of unknown function; green fluorescent protein (GFP)-fusion protein localizes to the cell periphery; msc3 mutants are defective in directing meiotic recombination events to homologous chromatids; potential Cdc28p substrate; protein abundance increases in response to DNA replication stress
NP42	E3	YGR096W	3.5465e-05	YGR096W	TPC1	Thiamine Pyrophosphate Carrier	Mitochondrial membrane transporter; mediates uptake of the essential cofactor thiamine pyrophosphate (ThPP) into mitochondria; expression appears to be regulated by carbon source; member of the mitochondrial carrier family
NP42	G9	YNL231C	4.14259e-05	YNL231C	PDR16	Pleiotropic Drug Resistance	Phosphatidylinositol transfer protein (PITP); controlled by the multiple drug resistance regulator Pdr1p; localizes to lipid particles and microsomes; controls levels of various lipids, may regulate lipid synthesis; homologous to Pdr17p; protein abundance increases in response to DNA replication stress
NP42	H3	YNL094W	4.422e-05	YNL094W	APP1	Actin Patch Protein	Phosphatidate phosphatase, converts phosphatidate to diacylglycerol; App1p, Pah1p, Dpp1p, and Lpp1p are responsible for all the phosphatidate phosphatase activity; component of cortical actin patches; interacts with components of endocytic pathway
NP6	F3	YDR142C	4.90024e-05	YDR142C	PEX7	PEroXin	Peroxisomal signal receptor for peroxisomal matrix proteins; recognizes the N-terminal nonapeptide signal (PTS2); WD repeat protein; defects in human homolog cause lethal rhizomelic chondrodysplasia punctata (RCDP)
NP42	G8	YNL254C	5.43076e-05	YNL254C	RTC4	Restriction of Telomere Capping	Protein of unknown function; null mutation suppresses cdc13-1 temperature sensitivity; (GFP)-fusion protein localizes to both the cytoplasm and the nucleus
NP36	G5	YMR026C	5.63057e-05	YMR026C	PEX12	PEroXin	C3HC4-type RING-finger peroxin and E3 ubiquitin ligase; required for peroxisome biogenesis and peroxisomal matrix protein import; forms translocation subcomplex with Pex2p and Pex10p; mutations in human homolog cause peroxisomal disorder
NP42	C12	YDR414C	5.80436e-05	YDR414C	ERD1	Endoplasmic reticulum Retention Defective	Predicted membrane protein required for lumenal ER protein retention; mutants secrete the endogenous ER protein, BiP (Kar2p)
EP2	F4	YDR081C	5.91476e-05	YDR081C	PDC2	Pyruvate DeCarboxylase	Transcription factor for thiamine-regulated genes; required for expression of the two isoforms of pyruvate decarboxylase (PDC1 and PDC5) along with thiamine biosynthetic genes; binds a DNA sequence in the PDC5 promoter; mutant fails to grow on 2% glucose and thus is scored as inviable under standard conditions
NP42	A3	YKR053C	6.02914e-05	YKR053C	YSR3	Yeast Sphingolipid Resistance	Dihydrosphingosine 1-phosphate phosphatase; membrane protein involved in sphingolipid metabolism; YSR3 has a paralog, LCB3, that arose from the whole genome duplication
NP4	D5	YHR176W	6.79804e-05	YHR176W	FMO1	Flavin containing MonoOxygenase	Flavin-containing monooxygenase; localized to the cytoplasmic face of the ER membrane; catalyzes oxidation of biological thiols to maintain the ER redox buffer ratio for correct folding of disulfide-bonded proteins
EP1	E6	YBR143C	7.054e-05	YBR143C	SUP45	SUPpressor	Polypeptide release factor (eRF1) in translation termination; mutant form acts as a recessive omnipotent suppressor; methylated by Mtq2p-Trm112p in ternary complex eRF1-eRF3-GTP; mutation of methylation site confers resistance to zymocin; has a role in cytokinesis through interaction with Mlc1p
EP4	G3	YGR005C	7.11886e-05	YGR005C	TFG2	Transcription Factor G	TFIIF (Transcription Factor II) middle subunit; involved in both transcription initiation and elongation of RNA polymerase II; homologous to human RAP30
NP42	G12	YNL141W	7.14335e-05	YNL141W	AAH1	Adenine AminoHydrolase	Adenine deaminase (adenine aminohydrolase); converts adenine to hypoxanthine; involved in purine salvage; transcriptionally regulated by nutrient levels and growth phase; Aah1p degraded upon entry into quiescence via SCF and the proteasome
NP32	F5	YLR006C	7.15817e-05	YLR006C	SSK1	Suppressor of Sensor Kinase	Cytoplasmic phosphorelay intermediate osmosensor and regulator; part of a two-component signal transducer that mediates osmosensing via a phosphorelay mechanism; required for mitophagy; dephosphorylated form is degraded by the ubiquitin-proteasome system; potential Cdc28p substrate
NP36	B12	YOR212W	7.20913e-05	YOR212W	STE4	STErile	G protein beta subunit; forms a dimer with Ste18p to activate mating signaling pathway, forms heterotrimer with Gpa1p and Ste18p to dampen signaling; pheromone-induced phosphorylation plays critical role in chemotropism; may recruit Rho1p to polarized growth site during mating; contains WD40 repeats
EP4	B5	YFR005C	7.22687e-05	YFR005C	SAD1	SnRNP Assembly Defective	Conserved zinc-finger domain protein involved in pre-mRNA splicing; critical for splicing of nearly all intron-containing genes; required for assembly of U4 snRNA into the U4/U6 particle
EP4	A2	YFL002C	7.2648e-05	YFL002C	SPB4	Suppressor of PAB1	Putative ATP-dependent RNA helicase; nucleolar protein required for synthesis of 60S ribosomal subunits at a late step in the pathway; sediments with 66S pre-ribosomes in sucrose gradients
NP42	G1	YLR385C	7.34984e-05	YLR385C	SWC7	SWr Complex	Protein of unknown function; component of the Swr1p complex that incorporates Htz1p into chromatin
NP42	H8	YNR045W	7.44462e-05	YNR045W	PET494	PETite colonies	Mitochondrial translational activator specific for the COX3 mRNA; acts together with Pet54p and Pet122p; located in the mitochondrial inner membrane
NP29	D12	YPR093C	7.47481e-05	YPR093C	ASR1	Alcohol Sensitive Ring/PHD finger	Ubiquitin ligase that modifies and regulates RNA Pol II; involved in a putative alcohol-responsive signaling pathway; accumulates in the nucleus under alcohol stress; has a role in organization of septins and the actin cytoskeleton; contains a Ring/PHD finger domain similar to the mammalian rA9 protein
NP44	B3	YML104C	7.55061e-05	YML104C	MDM1	Mitochondrial Distribution and Morphology	PtdIns-3-P binding protein that tethers the ER to vacuoles at NVJs; anchored in the ER membrane at nucleus-vacuole junctions and binds phosphatidylinositol 3-phosphate (PtdIns-3-P) in the vacuolar membrane via its Phox homology (PX) domain; expressed predominantly in late G1 to early S phase of the cell cycle; mutation affects nuclear and mitochondrial transmission to daughter buds; similar to 4 …
NP46	G3	YOR187W	7.56527e-05	YOR187W	TUF1		Mitochondrial translation elongation factor Tu (EF-Tu); involved in fundamental pathway of mtDNA homeostasis; comprises both GTPase and guanine nucleotide exchange factor activities, while these activities are found in separate proteins in S. pombe and humans; rare mutations in human mitochondrial elongation factor Tu (EFTu) associated with severe lactic acidosis, rapidly progressive fatal enceph…
NP42	C1	YDL173W	7.72381e-05	YDL173W	PAR32	Phosphorylated After Rapamycin	Low complexity protein; mediates inhibition of Mep1p and Mep3p activity; hyperphosphorylated upon rapamycin treatment in a Tap42p-dependent manner; green fluorescent protein (GFP)-fusion protein localizes to the cytoplasm; phosphorylation and localization regulated by TORC1-effector kinase, Npr1p
NP6	A3	YJL145W	7.84362e-05	YJL145W	SFH5	Sec Fourteen Homolog	Non-classical phosphatidylinositol transfer protein (PITP); exhibits PI- but not PC-transfer activity; localizes to the peripheral endoplasmic reticulum, cytosol and microsomes; similar to Sec14p; partially relocalizes to the plasma membrane upon DNA replication stress
NP22	D6	YER178W	7.91873e-05	YER178W	PDA1	Pyruvate Dehydrogenase Alpha	E1 alpha subunit of the pyruvate dehydrogenase (PDH) complex; catalyzes the direct oxidative decarboxylation of pyruvate to acetyl-CoA; phosphorylated; regulated by glucose; PDH complex is concentrated in spots within the mitochondrial matrix, often near the ERMES complex and near peroxisomes
NP42	A6	YNL067W	8.20087e-05	YNL067W	RPL9B	Ribosomal Protein of the Large subunit	Ribosomal 60S subunit protein L9B; homologous to mammalian ribosomal protein L9 and bacterial L6; RPL9B has a paralog, RPL9A, that arose from a single-locus duplication
EP4	F6	YGL172W	8.396e-05	YGL172W	NUP49	NUclear Pore	FG-nucleoporin component of central core of the nuclear pore complex; contributes directly to nucleocytoplasmic transport and maintenance of the nuclear pore complex (NPC) permeability barrier; found in stable complex with Nic96p and two other FG-nucleoproteins (Nsp1p and Nup57p)
EP4	C12	YGL048C	8.5684e-05	YGL048C	RPT6	Regulatory Particle Triple-A protein, or Regulatory Particle Triphosphatase	ATPase of the 19S regulatory particle of the 26S proteasome; one of six ATPases of the regulatory particle; involved in the degradation of ubiquitinated substrates; bound by ubiquitin-protein ligases Ubr1p and Ufd4p; localized mainly to the nucleus throughout the cell cycle; protein abundance increases in response to DNA replication stress
EP4	A9	YFL029C	9.04267e-05	YFL029C	CAK1	Cdk-Activating Kinase	Cyclin-dependent kinase-activating kinase; required for passage through the cell cycle; phosphorylates and activates Cdc28p; nucleotide-binding pocket differs significantly from those of most other protein kinases
NP42	E2	YGR085C	9.19283e-05	YGR085C	RPL11B	Ribosomal Protein of the Large subunit	Ribosomal 60S subunit protein L11B; expressed at half the level of Rpl11Ap; involved in ribosomal assembly; depletion causes degradation of 60S proteins and RNA; homologous to mammalian ribosomal protein L11 and bacterial L5; RPL11B has a paralog, RPL11A, that arose from the whole genome duplication
NP40	F8	YLR263W	9.85725e-05	YLR263W	RED1	REDuctional division	Protein component of the synaptonemal complex axial elements; involved in chromosome segregation during the first meiotic division; critical for coupling checkpoint signaling to SC formation; promotes interhomolog recombination by phosphorylating Hop1p; also interacts with Mec3p and Ddc1p
EP4	B2	YFR002W	9.95675e-05	YFR002W	NIC96	Nucleoporin-Interacting Component of 96 kDa	Linker nucleoporin component of the nuclear pore complex (NPC); also part of the NPC nuclear basket; contributes to nucleocytoplasmic transport and NPC biogenesis; forms stable associations with three FG-nucleoporins (Nsp1p, Nup57p, and Nup49p)
EP7	D5	YLL008W	0.000104019	YLL008W	DRS1	Deficiency of Ribosomal Subunits	Nucleolar DEAD-box protein required for ribosome assembly and function; including synthesis of 60S ribosomal subunits; constituent of 66S pre-ribosomal particles
EP4	F12	YGL245W	0.000104326	YGL245W	GUS1	GlUtamyl-tRNA Synthetase	Glutamyl-tRNA synthetase (GluRS); forms a complex with methionyl-tRNA synthetase (Mes1p) and Arc1p; complex formation increases the catalytic efficiency of both tRNA synthetases and ensures their correct localization to the cytoplasm; protein abundance increases in response to DNA replication stress
NP3	C6	YHR005C	0.000106339	YHR005C	GPA1	G Protein Alpha subunit	Subunit of the G protein involved in pheromone response; GTP-binding alpha subunit of the heterotrimeric G protein; negatively regulates the mating pathway by sequestering G(beta)gamma and by triggering an adaptive response; activates Vps34p at the endosome; protein abundance increases in response to DNA replication stress
NP36	C11	YOR230W	0.000109506	YOR230W	WTM1	WD repeat containing Transcriptional Modulator	Transcriptional modulator; involved in regulation of meiosis, silencing, and expression of RNR genes; required for nuclear localization of the ribonucleotide reductase small subunit Rnr2p and Rnr4p; contains WD repeats
NP42	A5	YKR085C	0.000110257	YKR085C	MRPL20	Mitochondrial Ribosomal Protein, Large subunit	Mitochondrial ribosomal protein of the large subunit
NP42	D6	YGL003C	0.000111233	YGL003C	CDH1	CDC20 Homolog	Activator of anaphase-promoting complex/cyclosome (APC/C); antagonist of the spindle assembly checkpoint; directs ubiquitination of cyclins resulting in mitotic exit; targets the APC/C to specific substrates including: Cdc20p, Ase1p, Cin8p, Fin1p and Clb5p; partially active in metaphase, and fully active in anaphase; cell-cycle regulated
EP6	G6	YKL021C	0.000114702	YKL021C	MAK11	MAintenance of Killer	Protein involved in an early step of 60S ribosomal subunit biogenesis; essential for cell growth and replication of killer M1 dsRNA virus; contains four beta-transducin repeats
EP2	C5	YDL143W	0.000119496	YDL143W	CCT4	Chaperonin Containing TCP-1	Subunit of the cytosolic chaperonin Cct ring complex; related to Tcp1p, required for the assembly of actin and tubulins in vivo
NP40	D7	YKL187C	0.000119792	YKL187C	FAT3	FATty acid transporter 3	Protein required for fatty acid uptake; protein abundance increases in cortical patches in response to oleate exposure; the authentic, non-tagged protein is detected in a phosphorylated state in highly purified mitochondria in high-throughput studies; FAT3 has a paralog, YLR413W, that arose from the whole genome duplication
EP4	A3	YFL005W	0.000120364	YFL005W	SEC4	SECretory	Rab family GTPase; essential for vesicle-mediated exocytic secretion and autophagy; associates with the exocyst component Sec15p and may regulate polarized delivery of transport vesicles to the exocyst at the plasma membrane
NP44	H2	YLR084C	0.00012053	YLR084C	RAX2		N-glycosylated protein; involved in the maintenance of bud site selection during bipolar budding; localization requires Rax1p; RAX2 mRNA stability is regulated by Mpt5p
NP40	A4	YGR061C	0.000120762	YGR061C	ADE6	ADEnine requiring	Formylglycinamidine-ribonucleotide (FGAM)-synthetase; catalyzes a step in the 'de novo' purine nucleotide biosynthetic pathway
EP1	F7	YBR234C	0.000121608	YBR234C	ARC40	ARp2/3 Complex subunit	Subunit of the ARP2/3 complex; ARP2/3 is required for the motility and integrity of cortical actin patches
EP8	G12	YMR227C	0.00012428	YMR227C	TAF7	TATA binding protein-Associated Factor	TFIID subunit (67 kDa); involved in RNA polymerase II transcription initiation
NP18	B5	YCR069W	0.000124414	YCR069W	CPR4	Cyclosporin-sensitive Proline Rotamase	Peptidyl-prolyl cis-trans isomerase (cyclophilin); catalyzes the cis-trans isomerization of peptide bonds N-terminal to proline residues; has a potential role in the secretory pathway; CPR4 has a paralog, CPR8, that arose from the whole genome duplication
NP42	D9	YGL226W	0.000124683	YGL226W	MTC3	Maintenance of Telomere Capping	Protein of unknown function; green fluorescent protein (GFP)-fusion protein localizes to the mitochondrion; mtc3 is synthetically sick with cdc13-1
NP42	H5	YNL003C	0.000126725	YNL003C	PET8	PETite colonies	S-adenosylmethionine transporter of the mitochondrial inner membrane; member of the mitochondrial carrier family; required for biotin biosynthesis and respiratory growth
EP8	A1	YLR249W	0.000128293	YLR249W	YEF3	Yeast Elongation Factor	Translation elongation factor 3; contains two ABC cassettes; binds and hydrolyzes ATP; YEF3 has a paralog, HEF3, that arose from the whole genome duplication
EP4	A1	YER172C	0.000129492	YER172C	BRR2	Bad Response to Refrigeration	RNA-dependent ATPase RNA helicase (DEIH box); required for disruption of U4/U6 base-pairing in native snRNPs to activate the spliceosome for catalysis; homologous to human U5-200kD
EP8	F6	YMR112C	0.000129706	YMR112C	MED11	MEDiator complex	Subunit of the RNA polymerase II mediator complex; associates with core polymerase subunits to form the RNA polymerase II holoenzyme; essential protein
EP6	D9	YJL173C	0.000130319	YJL173C	RFA3	Replication Factor A	Subunit of heterotrimeric Replication Protein A (RPA); RPA is a highly conserved single-stranded DNA binding protein complex involved in DNA replication, repair, recombination; RPA protects against inappropriate telomere recombination, and upon telomere uncapping, prevents cell proliferation by a checkpoint-independent pathway; with Sgs1p-Top2p-Rmi1p, stimulates DNA catenation/decatenation activi…
NP42	E1	YGR041W	0.000131589	YGR041W	BUD9	BUD site selection	Protein involved in bud-site selection; mutant has increased aneuploidy tolerance; diploid mutants display a unipolar budding pattern instead of the wild-type bipolar pattern, and bud at the distal pole; BUD9 has a paralog, BUD8, that arose from the whole genome duplication
EP4	B1	YFL045C	0.000132778	YFL045C	SEC53	SECretory	Phosphomannomutase; involved in synthesis of GDP-mannose and dolichol-phosphate-mannose; required for folding and glycosylation of secretory proteins in the ER lumen
NP42	C10	YDR392W	0.000133608	YDR392W	SPT3	SuPpressor of Ty's	Subunit of the SAGA and SAGA-like transcriptional regulatory complexes; interacts with Spt15p to activate transcription of some RNA polymerase II-dependent genes, also functions to inhibit transcription at some promoters; relocalizes to the cytosol in response to hypoxia
NP42	H2	YNL117W	0.000136425	YNL117W	MLS1	MaLate Synthase	Malate synthase, enzyme of the glyoxylate cycle; involved in utilization of non-fermentable carbon sources; expression is subject to carbon catabolite repression; localizes in peroxisomes during growth on oleic acid, otherwise cytosolic; can accept butyryl-CoA as acyl-CoA donor in addition to traditional substrate acetyl-CoA
EP4	F1	YGL145W	0.000137454	YGL145W	TIP20	SEC20 (Twenty) Interacting Protein	Peripheral membrane protein required for COPI vesicle fusion to the ER; mediates Sey1p-independent homotypic ER fusion; prohibits back-fusion of COPII vesicles with the ER; forms a tethering complex with Sec39p and Dsl1p that interacts with ER SNAREs Sec20p and Use1p
EP12	G1	YLR359W	0.000138046	YLR359W	ADE13	ADEnine requiring	Adenylosuccinate lyase; catalyzes two steps in the 'de novo' purine nucleotide biosynthetic pathway; expression is repressed by adenine and activated by Bas1p and Pho2p; mutations in human ortholog ADSL cause adenylosuccinase deficiency; human ADSL can complement yeast ADE13 null mutant
NP27	H8	YDR514C	0.00013859	YDR514C			Protein of unknown function that localizes to mitochondria; overexpression affects endocytic protein trafficking; YDR514C has a paralog, GFD2, that arose from the whole genome duplication
EP4	H3	YGR075C	0.000142181	YGR075C	PRP38	Pre-mRNA Processing	Unique component of the U4/U6.U5 tri-snRNP particle; tri-snRNP is required for conformational changes which result in the catalytic activation of the spliceosome; dispensable for spliceosome assembly
EP4	C2	YFR052W	0.00014396	YFR052W	RPN12	Regulatory Particle Non-ATPase	Subunit of the 19S regulatory particle of the 26S proteasome lid; synthetically lethal with RPT1, which is an ATPase component of the 19S regulatory particle; physically interacts with Nob1p and Rpn3p; protein abundance increases in response to DNA replication stress
NP45	B2	YLR363W-A	0.000144043	YLR363W-A			Protein of unknown function; green fluorescent protein (GFP)-fusion protein localizes to the nucleus; relocalizes from nucleus to nucleolus upon DNA replication stress
EP4	G1	YGL247W	0.000145509	YGL247W	BRR6	Bad Response to Refrigeration	Essential nuclear envelope integral membrane protein; interacts and functions with Apq12p and Brl1p in lipid homeostasis; mutants are defective in nuclear pore complex biogenesis, nuclear envelope morphology, mRNA nuclear export, and are sensitive to sterol biosynthesis inhibitors and membrane fluidizing agents; exhibits synthetic lethal genetic interactions with genes involved in lipid metabolis…
EP4	B7	YFR028C	0.000145511	YFR028C	CDC14	Cell Division Cycle	Protein phosphatase required for mitotic exit; required for rDNA segregation, cytokinesis, meiosis I spindle disassembly, environmental stress response; held in nucleolus by Cdc55p in early meiosis, liberated by FEAR and Mitotic Exit Network in anaphase, enabling it to effect a decrease in CDK/B-cyclin activity and mitotic exit; sequestered in metaphase II, released upon entry into anaphase II; h…
NP44	E10	YGL023C	0.000145585	YGL023C	PIB2	PhosphatidylInositol(3)-phosphate Binding	Protein of unknown function; contains FYVE domain; similar to Fab1 and Vps27
EP6	F5	YJR072C	0.000145931	YJR072C	NPA3	Nucleolar Preribosomal Associated	Member of the conserved GPN-loop GTPase family; has a role in transport of RNA polymerase II to the nucleus; exhibits GTP-dependent binding to PolII; has ATPase activity; involved in sister chromatid cohesion; phosphorylated by the Pcl1p-Pho85p kinase complex; human homolog XAB1 interacts with human RNA polymerase II; protein abundance increases in response to DNA replication stress
EP4	A8	YFL024C	0.00014595	YFL024C	EPL1	Enhancer of Polycomb Like	Subunit of NuA4, an essential histone H4/H2A acetyltransferase complex; conserved region at N-terminus is essential for interaction with the NPC (nucleosome core particle); required for autophagy; homologous to Drosophila Enhancer of Polycomb; coding sequence contains length polymorphisms in different strains
NP47	F3	YGL009C	0.000148105	YGL009C	LEU1	LEUcine biosynthesis	Isopropylmalate isomerase; catalyzes the second step in the leucine biosynthesis pathway
EP4	A11	YFL038C	0.000149204	YFL038C	YPT1	Yeast Protein Two	Rab family GTPase; involved in the ER-to-Golgi step of the secretory pathway; complex formation with the Rab escort protein Mrs6p is required for prenylation of Ypt1p by type II protein geranylgeranyltransferase (Bet2p-Bet4p); binds to unspliced HAC1 mRNA; regulates the unfolded protein response (UPR) by promoting the decay of HAC1 RNA; localizes to the early Golgi, the transitional Golgi and ER …
EP6	B8	YJL033W	0.00015055	YJL033W	HCA4	Helicase CA	DEAD box RNA helicase; component of the SSU; interacts with Bfr2p and Enp2p; high-copy number suppression of a U14 snoRNA processing mutant suggests an involvement in 18S rRNA synthesis
NP3	D2	YHR131C	0.000150847	YHR131C			Putative protein of unknown function; GFP-fusion protein localizes to the cytoplasm; overexpression causes cell cycle delay or arrest; contains a PH domain and binds phosphatidylinositols and other lipids in a large-scale study; YHR131C has a paralog, YNL144C, that arose from the whole genome duplication
NP25	F5	YBR173C	0.000155109	YBR173C	UMP1	Ubiquitin-Mediated Proteolysis	Chaperone required for correct maturation of the 20S proteasome; short-lived chaperone; may inhibit premature dimerization of proteasome half-mers; degraded by proteasome upon completion of its assembly
NP6	A2	YJL146W	0.000155124	YJL146W	IDS2	IME2-Dependent Signaling	Protein involved in modulation of Ime2p activity during meiosis; appears to act indirectly to promote Ime2p-mediated late meiotic functions; found in growing cells and degraded during sporulation
EP3	C10	YDR407C	0.000155467	YDR407C	TRS120	TRapp Subunit	Component of transport protein particle (TRAPP) complex II; TRAPPII is a multimeric guanine nucleotide-exchange factor for the GTPase Ypt1p, regulating intra-Golgi and endosome-Golgi traffic
EP4	D3	YGL065C	0.000155593	YGL065C	ALG2	Asparagine-Linked Glycosylation	Mannosyltransferase in the N-linked glycosylation pathway; catalyzes two consecutive steps in the N-linked glycosylation pathway; alg2 mutants exhibit temperature-sensitive growth and abnormal accumulation of the lipid-linked oligosaccharide Man2GlcNAc2-PP-Dol; human ALG2 complements the temperature sensitivity and dolichol-linked oligosaccharide biosynthesis defect of the alg2-1 mutant, but muta…
NP18	H10	YER005W	0.000155891	YER005W	YND1	Yeast Nucleoside Diphosphatase	Apyrase with wide substrate specificity; helps prevent inhibition of glycosylation by hydrolyzing nucleoside tri- and diphosphates that inhibit glycotransferases; partially redundant with Gda1p; mediates adenovirus E4orf4-induced toxicity
EP4	H11	YGR099W	0.000156309	YGR099W	TEL2	TELomere maintenance	Subunit of the ASTRA complex, involved in chromatin remodeling; subunit of the telomere cap complex DNA-binding protein specific to single-stranded yeast telomeric DNA repeats, required for telomere length regulation and telomere position effect; involved in the stability or biogenesis of PIKKs such as TORC1
EP4	E11	YGL137W	0.00015675	YGL137W	SEC27	SECretory	Essential beta'-coat protein of the COPI coatomer; involved in ER-to-Golgi and Golgi-to-ER transport; contains WD40 domains that mediate cargo selective interactions; 45% sequence identity to mammalian beta'-COP
EP4	H10	YGR098C	0.00015679	YGR098C	ESP1	Extra Spindle Pole bodies	Separase/separin, a caspase-like cysteine protease; cleaves Mcd1p/Scc1p, a mitotic cohesin complex subunit, resulting in the dissociation of cohesin from chromatin and sister chromatid separation; cleaves meiotic-cohesin subunit Rec8p along chromosome arms in meiosis I and at centromeric sites during meiosis II; inhibits PP2A-Cdc55p to promote mitotic exit; inhibited by Pds1p (securin); relative …
NP35	B11	YNL176C	0.000158167	YNL176C	TDA7	Topoisomerase I Damage Affected	Cell cycle-regulated gene of unknown function; promoter bound by Fkh2p; null mutant is sensitive to expression of the top1-T722A allele; TDA7 has a paralog, YDL211C, that arose from the whole genome duplication
NP42	H7	YNR021W	0.000158422	YNR021W			Putative protein of unknown function; green fluorescent protein (GFP)-fusion protein localizes to the endoplasmic reticulum; YNR021W is not an essential gene
EP12	B2	YLR086W	0.000160256	YLR086W	SMC4	Structural Maintenance of Chromosomes	Subunit of the condensin complex; condensin reorganizes chromosomes during both mitosis and meiosis; forms a subcomplex with Smc2p that has ATP-hydrolyzing and DNA-binding activity, but other condensin subunits are required for chromatin binding; required for tRNA gene clustering at the nucleolus; potential Cdc28p substrate
EP2	B12	YDL126C	0.000160393	YDL126C	CDC48	Cell Division Cycle	AAA ATPase; subunit of polyUb-selective segregase complex involved in ERAD, INM-associated degradation (INMAD), mitotic spindle disassembly, macroautophagy, PMN, ribosome-associated degradation, ribophagy, homotypic ER membrane fusion, SCF complex disassembly, cell wall integrity during heat stress, and telomerase regulation; mobilizes membrane-anchored transcription factors by regulated Ub/prote…
EP4	D4	YGL068W	0.000160607	YGL068W	MNP1	Mitochondrial-Nucleoid Protein	Mitochondrial ribosomal protein of the large subunit; has similarity to E. coli L7/L12 and human MRPL7 ribosomal proteins; associates with the mitochondrial nucleoid; required for normal respiratory growth
EP1	H2	YCR035C	0.000162184	YCR035C	RRP43	Ribosomal RNA Processing	Exosome non-catalytic core component; involved in 3'-5' RNA processing and degradation in both the nucleus and the cytoplasm; has similarity to E. coli RNase PH and to human hRrp43p (OIP2, EXOSC8); protein abundance increases in response to DNA replication stress
NP47	E7	YEL061C	0.000162741	YEL061C	CIN8	Chromosome INstability	Kinesin motor protein; involved in mitotic spindle assembly and chromosome segregation
NP26	E5	YDL146W	0.000164278	YDL146W	LDB17	Low Dye Binding	Protein involved in the regulation of endocytosis; transiently recruited to actin cortical patches in a SLA1-dependent manner after late coat component assembly; GFP-fusion protein localizes to the periphery, cytoplasm, bud, and bud neck
NP18	E1	YNL130C	0.000164407	YNL130C	CPT1	CholinePhosphoTransferase	Cholinephosphotransferase; required for phosphatidylcholine biosynthesis and for inositol-dependent regulation of EPT1 transcription; CPT1 has a paralog, EPT1, that arose from the whole genome duplication
EP1	F10	YBR243C	0.00016486	YBR243C	ALG7	Asparagine-Linked Glycosylation	UDP-N-acetyl-glucosamine-1-P transferase; transfers Glc-Nac-P from UDP-GlcNac to Dol-P in the ER in the first step of the dolichol pathway of protein asparagine-linked glycosylation; inhibited by tunicamycin; human homolog DPAGT1 can complement yeast ALG7 mutant
EP5	F10	YIL019W	0.000165424	YIL019W	FAF1	Forty (40) S Assembly Factor	Protein required for pre-rRNA processing; also required for 40S ribosomal subunit assembly
NP26	E4	YDL144C	0.000165506	YDL144C			Protein of unknown function; green fluorescent protein (GFP)-fusion protein localizes to the cytoplasm and nucleus; YDL144C is not an essential gene; protein abundance increases in response to DNA replication stress

## Sheet: S5E) Hit Validation
					Key
					<10,000 droplets
					Too few negative droplets
					<10copies/uL TUB1
Plate	Well	Sample Name	rDNA repeat loss rate		Copy number
			Prep 1	Prep 2	rDNA	LEU2
High Hit 1	A1	p5472	0.000546953	0.000468807	142.295	#VALUE!
High Hit 1	A2	GFP+	0.109032	0.132991	170.336	1.01136
High Hit 1	A3	DES7	0.0137721	0.0105878	187.5	2.51181
High Hit 1	A4	YPL066W	0.00109899	0.000896368	139.608	2.16393
High Hit 1	A5	YPR132W	0.00070425	0.00132195	138.528	#VALUE!
High Hit 1	A6	YGR071C	0.000677506	0.000615452	126.471	2.33954
High Hit 1	A7	YBR123C	0.00155574	0.00470951	93.956	#VALUE!
High Hit 1	A8	YBL054W	0.000471611	0.000577639	142.52	2.38361
High Hit 1	A9	YAR002W	0.0020671	0.00219873	101.071	2.53049
High Hit 1	A10	YER161C	0.000435566	0.000444185	156.142	2.06954
High Hit 1	A11	YDR506C	0.000664177	0.000781512	127.228	2.14
High Hit 1	A12	YDR163W	0.000431963	0.000353362	144.091	2.46411
High Hit 1	B1	YOR319W	0.00490318	0.00334682	#VALUE!	2.34742
High Hit 1	B2	YPR162C	0.00109699	0.000602897	134.903	2.10174
High Hit 1	B3	YGR261C	0.00179573	0.00079679	130.163	2.11957
High Hit 1	B4	YPL038W	0.00236582	0.00171923	147.211	2.02733
High Hit 1	B5	YJR060W	0.000601355	0.000593084	148.018	2.16933
High Hit 1	B6	YGR118W	0.000619085	0.000666707	134.574	2.24532
High Hit 1	B7	YAL001C	0.00337488	0.004112	120.567	2.15337
High Hit 1	B8	YBL079W	0.000473231	0.000698904	133.659	2.09213
High Hit 1	B9	YER113C	0.000899623	0.00101785	132.176	2.24021
High Hit 1	B10	YER179W	0.00062591	0.000705588	144.059	2.23553
High Hit 1	B11	YDR500C	0.00049139	0.000754939	124.906	2.24678
High Hit 1	B12	YDR195W	0.000292155	0.000559975	131.047	2.37535
High Hit 1	C1	YOR206W	0.000827541	0.00170818	122	2.14103
High Hit 1	C2	YLR071C	0.000554659	0.00094332	121.123	2.07447
High Hit 1	C3	YLR449W	0.00264482	0.00232416	123	2.19697
High Hit 1	C4	YPL110C	0.000593543	0.000764661	123.214	2.15886
High Hit 1	C5	YJR050W	0.000858991	0.000940151	128.293	2.1256
High Hit 1	C6	YGR078C	0.000655834	0.000856303	120.576	2.44131
High Hit 1	C7	YML111W	0.000970253	0.00163777	117.193	2.30659
High Hit 1	C8	YBL006C	0.00029628	0.000655407	126.131	2.01211
High Hit 1	C9	YMR072W	0.000523149	0.000704424	124.607	2.31343
High Hit 1	C10	YMR053C	0.000555243	0.000700788	137.654	2.00783
High Hit 1	C11	YBR024W	0.000379991	0.000442438	130	2.42529
High Hit 1	C12	YGL043W	0.000332236	0.000502888	148.804	2.14859
High Hit 1	D1	YOR004W	0.000937034	0.00133993	120.064	2
High Hit 1	D2	YNL251C	0.00186156	0.00136559	149.065	2.27876
High Hit 1	D3	YML021C	0.00198298	0.00148474	130.969	2.21591
High Hit 1	D4	YPL103C	0.000746516	0.000695309	142.481	1.96765
High Hit 1	D5	YJR055W	0.000800562	0.00071575	121.406	2.26891
High Hit 1	D6	YJL060W	0.000959454	0.00086577	92.9167	2.20101
High Hit 1	D7	YKL005C	0.000879278	0.000844364	145.213	2.5
High Hit 1	D8	YBL046W	0.000945646	0.000969417	137.126	2.01538
High Hit 1	D9	YMR069W	0.000575807	0.00061851	143.07	2.10196
High Hit 1	D10	YCR092C	0.000614979	0.000556141	138.424	2.17318
High Hit 1	D11	YBR037C	0.000537746	0.000825044	140.351	2
High Hit 1	D12	YGL135W	0.000353114	0.00030372	141.176	2.47039
High Hit 1	E1	YOL135C	0.000540934	0.000672205	138.693	2.26013
High Hit 1	E2	YGR280C	0.00115254	0.000728974	131.25	2.12389
High Hit 1	E3	YLR452C	0.00188257	0.00112335	117.857	2.78926
High Hit 1	E4	YPL026C	0.000440846	0.000503021	120.4	2.45255
High Hit 1	E5	YCR088W	0.000554673	0.000811049	134.434	2.38762
High Hit 1	E6	YJL127C	0.00116548	0.000650397	136.709	2.23938
High Hit 1	E7	YBL052C	0.00243317	0.00327694	110.723	2.1
High Hit 1	E8	YAL021C	0.00059073	0.000805413	125.333	2.09348
High Hit 1	E9	YMR075W	0.000706578	0.000640407	154.085	2.34524
High Hit 1	E10	YMR322C	0.000366859	-0.00180979	146.078	2.18688
High Hit 1	E11	YGR247W	0.000581875	0.000708761	144.727	2.07154
High Hit 1	E12	YDL201W	0.000371334	0.000403179	155.85	2.22222
High Hit 1	F1	YPL122C	0.000700675	0.000844018	127.419	2.1202
High Hit 1	F2	YPL193W	0.00118583	0.00149745	143.775	2.1708
High Hit 1	F3	YPL079W	0.00161662	0.00361095	117.904	2.26415
High Hit 1	F4	YJR043C	0.000942252	0.00190901	125.563	2.25387
High Hit 1	F5	YNL073W	0.000662337	0.000588644	147.304	2.22039
High Hit 1	F6	YGR056W	0.000515178	0.00064	75	2.35273
High Hit 1	F7	YBL001C	0.00326791	0.00288801	130.39	2.10748
High Hit 1	F8	YAL034C	0.000609114	0.000424404	152.147	2.173
High Hit 1	F9	YAL013W	0.00103689	0.000695407	128.99	2.25837
High Hit 1	F10	YBR025C	0.00134101	0.000644464	144.901	2.27621
High Hit 1	F11	YDR171W	0.00077373	0.000693643	160.448	2.05882
High Hit 1	F12	YDL237W	0.000390099	0.000418091	160.914	2.07868
High Hit 1	G1	YOR027W	0.00152852	0.000902079	158.442	2.41252
High Hit 1	G2	YPL254W	0.00201214	0.000889788	131.225	2.08197
High Hit 1	G3	YPL121C	0.00227067	0.0014972	141.921	2.52836
High Hit 1	G4	YPR135W	0.0015212	0.00154763	115.509	2.35569
High Hit 1	G5	YNL072W	0.0012126	0.000630435	124.78	2.10989
High Hit 1	G6	YBR152W	0.0015703	0.00281833	98.8745	2.3993
High Hit 1	G7	YBL056W	0.000957881	0.000687699	141.039	2.1129
High Hit 1	G8	YAL029C	0.000627657	0.000462251	154.13	2.10269
High Hit 1	G9	YER107C	0.000835219	0.000660407	153.371	2.43781
High Hit 1	G10	YGR252W	0.00101374	0.000786519	148.039	2.06186
High Hit 1	G11	YGL049C	0.000640735	0.000447778	153.521	2.30203
High Hit 1	G12	YGR023W	0.00067188	0.000455805	147.222	2.2037
High Hit 1	H1	p5472	0.000518497	0.000389294	151.818	2.30444
High Hit 1	H2	BY4741	3.25277e-05	1.99761e-06	158.235	#VALUE!
High Hit 1	H3	DES7 top1Δ	0.00651013	0.00182478	141.707	2.34524
High Hit 1	H4	YJR025C	0.0020148	0.00104806	140.659	2.05638
High Hit 1	H5	YFR013W	0.000849095	0.00105887	132.035	2.20126
High Hit 1	H6	YBL074C	0.00304112	0.00207269	106.25	1.95402
High Hit 1	H7	YBL024W	0.000950812	0.000561727	139.145	#VALUE!
High Hit 1	H8	YBL019W	0.000332071	0.000622513	140.893	2.07
High Hit 1	H9	YER141W	0.00198416	0.00192014	#VALUE!	0.37037
High Hit 1	H10	YOR274W	0.000662324	0.000757285	131.579	2.16814
High Hit 1	H11	YDR181C	0.000533638	0.000449885	145.161	2.37037
High Hit 1	H12	YDR168W	0.00422493	0.00248762	149.289	2.20077
High Hit 2	A1	p5472	0.00100437	0.00060125	118.958	2.40729
High Hit 2	A2	GFP+	0.138531	0.149667	99.8667	0.930233
High Hit 2	A3	DES7	0.00212748	0.00286932	128.649	2.34226
High Hit 2	A4	YDR052C	0.000555611	0.000473549	117.671	2.19355
High Hit 2	A5	YLR344W	0.0012086	0.00109922	#VALUE!	2.35909
High Hit 2	A6	YNL185C	0.000228232	0.00415064	83.1122	2.43467
High Hit 2	A7	YCR036W	0.000490864	0.000619673	106.827	2.14405
High Hit 2	A8	YJL170C	0.00037619	0.000738207	127.917	2.0364
High Hit 2	A9	YKR095W	0.000412575	0.00107228	124.694	2.20323
High Hit 2	A10	YDR174W	0.00121066	0.000636491	123.636	2.19858
High Hit 2	A11	YJR052W	0.000478031	0.000448551	138.509	2.14085
High Hit 2	A12	YOR233W	0.00159098	0.00111842	134.386	2.11268
High Hit 2	B1	YGR098C	0.000524501	0.000264956	128.636	2.19897
High Hit 2	B2	YJR072C	0.000761465	0.000480052	99.0278	2.31325
High Hit 2	B3	YMR227C	0.000570446	0.000413805	123.043	2.16352
High Hit 2	B4	YDR305C	0.000570604	0.000647915	100.667	2.58007
High Hit 2	B5	YLR085C	0.000440281	0.00104926	83.8983	2.05801
High Hit 2	B6	YNL021W	0.0014107	0.00128664	78.622	3.06759
High Hit 2	B7	YDR030C	0.000539579	0.000631751	129.067	2.33083
High Hit 2	B8	YGL025C	0.000515703	0.000528999	112.651	2.50857
High Hit 2	B9	YDR390C	0.000803553	0.000771152	110.256	2.20476
High Hit 2	B10	YBR295W	0.000604017	0.000645105	140.938	2.40233
High Hit 2	B11	YML070W	0.000236057	0.000484441	115.888	2.20484
High Hit 2	B12	YHR203C	0.000800743	0.00103912	139.409	2.13699
High Hit 2	C1	YDR386W	0.000657022	0.000879832	129.851	2.15385
High Hit 2	C2	YJL033W	0.000274078	0.000390535	107.062	2.0907
High Hit 2	C3	YLR249W	0.000455866	0.00116463	90.6373	2.09647
High Hit 2	C4	YDR317W	0.000886588	0.00062704	85.68	2.18723
High Hit 2	C5	YMR297W	0.00393235	0.0060403	60.5694	2.19048
High Hit 2	C6	YOR198C	0.00210956	0.00145011	81.1588	2.20179
High Hit 2	C7	YLL018C-A	0.000807273	0.000649938	97.5862	2.3
High Hit 2	C8	YNL286W	0.000383246	0.000736239	109.426	2.57627
High Hit 2	C9	YDR292C	0.000618421	0.00118503	89.5	2.24359
High Hit 2	C10	YAL012W	0.000545304	0.0008338	101.882	2.21906
High Hit 2	C11	YDL160C-A	0.000330308	0.000709636	98.4733	2.15789
High Hit 2	C12	YIL126W	0.00272035	0.0052605	78.7892	2.5963
High Hit 2	D1	YIL019W	0.000336248	0.000721843	110.895	2.32143
High Hit 2	D2	YFR009W	0.000491872	0.000561023	95.1538	2.33397
High Hit 2	D3	YMR112C	0.000519372	0.000584171	103.689	2.48319
High Hit 2	D4	YDR310C	0.000608658	0.000695635	85.5556	2.38795
High Hit 2	D5	YNL280C	0.00304641	0.00396834	86.4103	1.99038
High Hit 2	D6	YML017W	0.00202994	0.00137875	77.173	2.05372
High Hit 2	D7	YML057W	0.000575967	0.000549323	94.8739	2.1775
High Hit 2	D8	YGR200C	0.000756612	0.00068566	105.61	2.24444
High Hit 2	D9	YDR324C	0.000553089	0.000683007	103.544	2.22707
High Hit 2	D10	YBR189W	0.000572482	0.000836758	116.214	2.02532
High Hit 2	D11	YOR312C	0.00285206	0.00685048	90.6098	2.61719
High Hit 2	D12	YHR170W	0.000481237	0.00151268	108.333	3.22778
High Hit 2	E1	YJR017C	0.000181201	0.000522913	112.03	2.71408
High Hit 2	E2	YLL008W	0.00023941	0.000590315	107.523	2.18881
High Hit 2	E3	YDR224C	0.000443262	0.000570748	97.5862	2.46721
High Hit 2	E4	YER027C	0.000759271	0.000731552	88.5276	2.37621
High Hit 2	E5	YMR275C	0.00332141	0.0032406	94.7959	2.21026
High Hit 2	E6	YNR034W	0.000780258	0.0013343	105.808	2.37059
High Hit 2	E7	YCR031C	0.000276604	0.000329442	117.109	2.26316
High Hit 2	E8	YKL137W	0.000680509	0.000701656	97.9253	2.37617
High Hit 2	E9	YCR059C	0.00122458	0.00172315	106.207	2.23958
High Hit 2	E10	YKR101W	0.000928556	0.000663977	110.682	2.16393
High Hit 2	E11	YNL004W	0.001182	0.00274023	79.6805	2.3494
High Hit 2	E12	YIL139C	0.000575396	0.000732623	116.783	2.31801
High Hit 2	F1	YKL021C	0.000365621	0.000691351	128.922	2.23971
High Hit 2	F2	YMR208W	0.000779188	0.000980479	127.84	2.32083
High Hit 2	F3	YDL031W	0.000555639	0.000644094	99.1837	2.32152
High Hit 2	F4	YDR289C	0.000478923	0.000599696	115.943	2.12381
High Hit 2	F5	YNL335W	0.000860829	0.00173263	94.0777	2.49711
High Hit 2	F6	YOR213C	0.000420117	0.00105672	87.1942	2.35391
High Hit 2	F7	YDR283C	0.000437994	0.000518456	94.5902	2.34961
High Hit 2	F8	YKL114C	0.000478015	0.000466044	120.507	2.52358
High Hit 2	F9	YDR349C	0.000571859	0.0011864	115.417	2.20833
High Hit 2	F10	YOR386W	0.000619233	0.00046685	111.244	2.22378
High Hit 2	F11	YPL037C	0.00176611	0.00171476	90.8772	2.22004
High Hit 2	F12	YKL109W	0.000471905	0.00101108	122.222	2.03756
High Hit 2	G1	YJL173C	0.000729115	0.000694009	106.094	2.34862
High Hit 2	G2	YMR268C	0.00176474	0.000925749	120.126	2.35484
High Hit 2	G3	YDR082W	0.000763534	0.000526494	127.559	2.46304
High Hit 2	G4	YLL046C	0.000981354	0.00163362	94.2784	2.67449
High Hit 2	G5	YNL259C	0.00171246	0.00214077	161.786	2.50867
High Hit 2	G6	YLR431C	0.00126144	0.00148763	91.7131	2.25673
High Hit 2	G7	YGR141W	0.00144018	0.00124856	98.7931	2.16981
High Hit 2	G8	YLL002W	0.000470443	0.000594706	104.196	2.16522
High Hit 2	G9	YDR370C	0.000808941	0.000994236	112.972	2.32553
High Hit 2	G10	YJR104C	0.000440351	0.000651174	115.679	2.06557
High Hit 2	G11	YER049W	0.00139593	0.00206217	110.87	2.20302
High Hit 2	G12	YNR053C	0.000941272	0.000590805	125.957	2.07921
High Hit 2	H1	p5472	0.000705663	0.000460291	121.627	2.21785
High Hit 2	H2	BY4741	1.8535e-05	0	163.526	#VALUE!
High Hit 2	H3	DES7 top1Δ	0.00237134	0.00333686	143.581	2.54467
High Hit 2	H4	YGR208W	0.000952667	0.000638521	113.312	2.42105
High Hit 2	H5	YMR273C	0.0006196	0.00188137	101.854	2.26837
High Hit 2	H6	YER019W	0.000715961	0.000621932	116.387	2.41593
High Hit 2	H7	YKR060W	0.000790726	0.000564376	118.444	2.31834
High Hit 2	H8	YLR425W	0.00516652	0.00466884	114.812	2.41714
High Hit 2	H9	YML068W	0.000603187	0.000889285	143.119	2.19561
High Hit 2	H10	YJR145C	0.000201235	0.000464295	124.031	2.18254
High Hit 2	H11	YOR368W	0.000916585	0.000996596	116.467	2.28155
High Hit 2	H12	YOL078W	0.000602634	0.000848481	139.153	2.46154
Low Hit	A1	p5472	0.000544822	0.000463972	112.013	1.10198
Low Hit	A2	GFP+	-0.00292227	0.137288	#VALUE!	0.935766
Low Hit	A3	DES7	0.0235596	0.00873435	101.651	2.39769
Low Hit	A4	YOR243C	0.000203776	0.00049326	102.358	#VALUE!
Low Hit	A5	YLR240W	9.08123e-05	0.000575905	103.571	2.19512
Low Hit	A6	YJL138C	4.68888e-05	0.000611122	90.8163	1.93182
Low Hit	A7	YJL168C	6.27154e-05	0.000547015	179.615	2.29878
Low Hit	A8	YLR327C	1.60415e-05	0.000456215	130.543	1.89577
Low Hit	A9	YBR163W	5.50632e-05	0.00043329	95.9204	2.57862
Low Hit	A10	YOR187W	9.7342e-05	0.000239783	146.457	2.08024
Low Hit	A11	YGR005C	5.86434e-05	0.000441429	112.67	2.14712
Low Hit	A12	YFL005W	4.80362e-05	0.000461434	121.105	2.18119
Low Hit	B1	YLR359W	0.000172498	0.000332253	112.227	1.98529
Low Hit	B2	YDL143W	0.000199852	0.000141395	123.744	2.59346
Low Hit	B3	YNL064C	0.00156199	0.000481074	125.339	2.48731
Low Hit	B4	YMR167W	0.000466914	0.000549211	85.4938	2.03673
Low Hit	B5	YKL184W	5.66146e-05	0.000547598	100.591	1.94648
Low Hit	B6	YGL086W	0.000139528	0.000485336	83.6327	#VALUE!
Low Hit	B7	YKR026C	2.90626e-05	0.00048876	88.1818	2.2293
Low Hit	B8	YBR101C	-3.00908e-05	0.000480187	90.8377	2.02235
Low Hit	B9	YDR375C	0.000147115	0.000354988	139.936	2.10598
Low Hit	B10	YEL061C	0.000197102	0.000299205	109.383	2.29878
Low Hit	B11	YFR005C	0.000176955	0.000451536	109.018	2.30244
Low Hit	B12	YER172C	6.88958e-05	0.000459589	116.741	2.29278
Low Hit	C1	YLR086W	6.31479e-05	0.000172622	119.924	2.51064
Low Hit	C2	YDL126C	0.00016789	0.000321881	132.148	2.31783
Low Hit	C3	YJL147C	0.000131411	0.000827211	107.891	2.12157
Low Hit	C4	YKL185W	9.76289e-05	0.000528445	113.402	2.26705
Low Hit	C5	YOR241W	8.07212e-05	0.000595242	100.662	2.00389
Low Hit	C6	YLR318W	1.57603e-05	0.00054918	105.828	2.03279
Low Hit	C7	YKL197C	1.53147e-05	0.000635825	91.0526	2.35211
Low Hit	C8	YDR173C	-0.000167594	0.000574996	113.468	2.23419
Low Hit	C9	YNL307C	0.000148098	0.000539635	96.4706	2.16312
Low Hit	C10	YGR013W	-0.000854054	0.00317528	100.383	2.18924
Low Hit	C11	YFL002C	0.000123294	0.000790888	120.426	2.26345
Low Hit	C12	YGR075C	0.000170743	0.000433169	154.848	2.09223
Low Hit	D1	YER005W	0.000132085	0.00041529	105.802	2.65323
Low Hit	D2	YNL176C	0.000176753	0.000339849	106.636	#VALUE!
Low Hit	D3	YGL094C	1.54171e-05	0.000404451	96.4912	2.39264
Low Hit	D4	YLR143W	5.8115e-05	0.000510348	94.1279	1.95789
Low Hit	D5	YKL205W	0.000157351	0.000437653	112.449	2.40807
Low Hit	D6	YHR154W	5.68418e-05	0.000580741	97.5758	2.14442
Low Hit	D7	YLR219W	0.000139356	0.000427164	94.7853	2.22018
Low Hit	D8	YDR092W	0.000128598	0.000444964	113.466	2.12955
Low Hit	D9	YLR385C	5.83065e-05	0.000435652	104.29	2.18504
Low Hit	D10	YGL123W	-0.000174933	0.00130942	110.974	2.21596
Low Hit	D11	YGL172W	0.00010524	0.000406147	104.222	2.16049
Low Hit	D12	YGL247W	5.53846e-05	0.000480393	119.524	2.1074
Low Hit	E1	YBR143C	4.44532e-05	0.000417372	131.966	2.1841
Low Hit	E2	YOR230W	0.000102548	0.000366706	114.095	2.10046
Low Hit	E3	YJL197W	5.68955e-05	0.000537154	104.733	2.36916
Low Hit	E4	YLR367W	0.00017518	0.000470177	101.573	2.31806
Low Hit	E5	YKR056W	0.000138976	0.000543186	98.6188	2.432
Low Hit	E6	YLR176C	0.000110064	0.000526047	118.794	2.36937
Low Hit	E7	YGR061C	0.000211261	0.000337329	93.4375	2.52055
Low Hit	E8	YDL025C	9.65011e-05	0.000515985	109.6	2.02492
Low Hit	E9	YNL067W	0.000131747	0.000340161	112.917	2.24033
Low Hit	E10	YFL037W	6.38783e-05	2.93123e-05	96.8668	1.63592
Low Hit	E11	YGL048C	0.000141189	0.000513852	125.926	2.21254
Low Hit	E12	YFR028C	0.000206087	0.000752809	114.134	2.12418
Low Hit	F1	YCR035C	5.92312e-05	0.00012086	68.8415	5.2381
Low Hit	F2	YHR005C	0.000111374	0.000429603	149.405	2.40132
Low Hit	F3	YJL186W	4.68857e-05	0.000704463	124.696	2.30918
Low Hit	F4	YLR135W	7.67638e-05	0.000509169	122.881	2.15766
Low Hit	F5	YMR190C	9.95301e-05	0.000489133	119.831	2.58385
Low Hit	F6	YNL236W	0.000107354	0.000467434	109.174	2.24194
Low Hit	F7	YNL001W	0.000133997	0.0006237	108.083	2.2201
Low Hit	F8	YDR315C	0.000165998	0.00034745	109.96	2.22635
Low Hit	F9	YGR085C	0.000132395	0.000386055	137.955	2.45109
Low Hit	F10	YFR027W	0	0.000478316	107.168	2.03866
Low Hit	F11	YFL029C	0.000141476	0.000492908	127.125	2.19677
Low Hit	F12	YFL024C	0.000130739	0.00028328	142.458	2.23181
Low Hit	G1	YDR177W	0.000105333	0.000260142	119.49	2.32
Low Hit	G2	YJL080C	0.000106343	0.000367639	111.908	2.08257
Low Hit	G3	YGL133W	0.000125827	0.000491296	113.772	2.36667
Low Hit	G4	YKL181W	0.000146574	0.000489169	165.698	2.25743
Low Hit	G5	YMR176W	8.58599e-05	0.000455926	119.062	2.20833
Low Hit	G6	YLR182W	0.000160875	0.000445045	95.1673	2.17759
Low Hit	G7	YGL250W	7.78331e-05	0.000486859	89.6694	2.25322
Low Hit	G8	YFR014C	0.000137717	0.000454239	112.121	2.0398
Low Hit	G9	YDR392W	0.000100441	0.00040578	114.375	2.0201
Low Hit	G10	YGR074W	4.17831e-05	0.000626894	113.114	2.11653
Low Hit	G11	YFR002W	4.63639e-05	0.000819029	117.617	2.19459
Low Hit	G12	YFL038C	0.000173879	0.000375769	125.49	2.0348
Low Hit	H1	p5472	0.000158072	0.000444802	133.816	2.54491
Low Hit	H2	BY4741	1.4384e-05	6.75984e-07	152.206	0.109804
Low Hit	H3	DES7 top1Δ	0.000526445	0.00176603	126.562	2.22458
Low Hit	H4	YOR076C	0.000158385	0.000381569	111.236	2.29422
Low Hit	H5	YHR079C	0.000139498	0.000511507	110.374	2.26221
Low Hit	H6	YMR216C	0.000186493	0.000390496	125.941	2.26636
Low Hit	H7	YOR266W	6.56106e-05	0.000508107	115.461	2.09222
Low Hit	H8	YMR242C	0.000152153	0.000414975	98.8281	2.19665
Low Hit	H9	YHR091C	0.000117175	0.000385407	114.612	2.23529
Low Hit	H10	YGL130W	0.000100766	0.000400277	93.5907	2.20524
Low Hit	H11	YGL245W	0.000156536	0.000408907	103.691	2.12928
Low Hit	H12	YGR099W	0.000153573	0.000328166	129.893	2.41935
