# Supplementary material
Source: publisher figshare collection journal article supplement (https://gsajournals.figshare.com/articles/dataset/_/14195492)
Supplement: Supplementary file 2 [file 1]

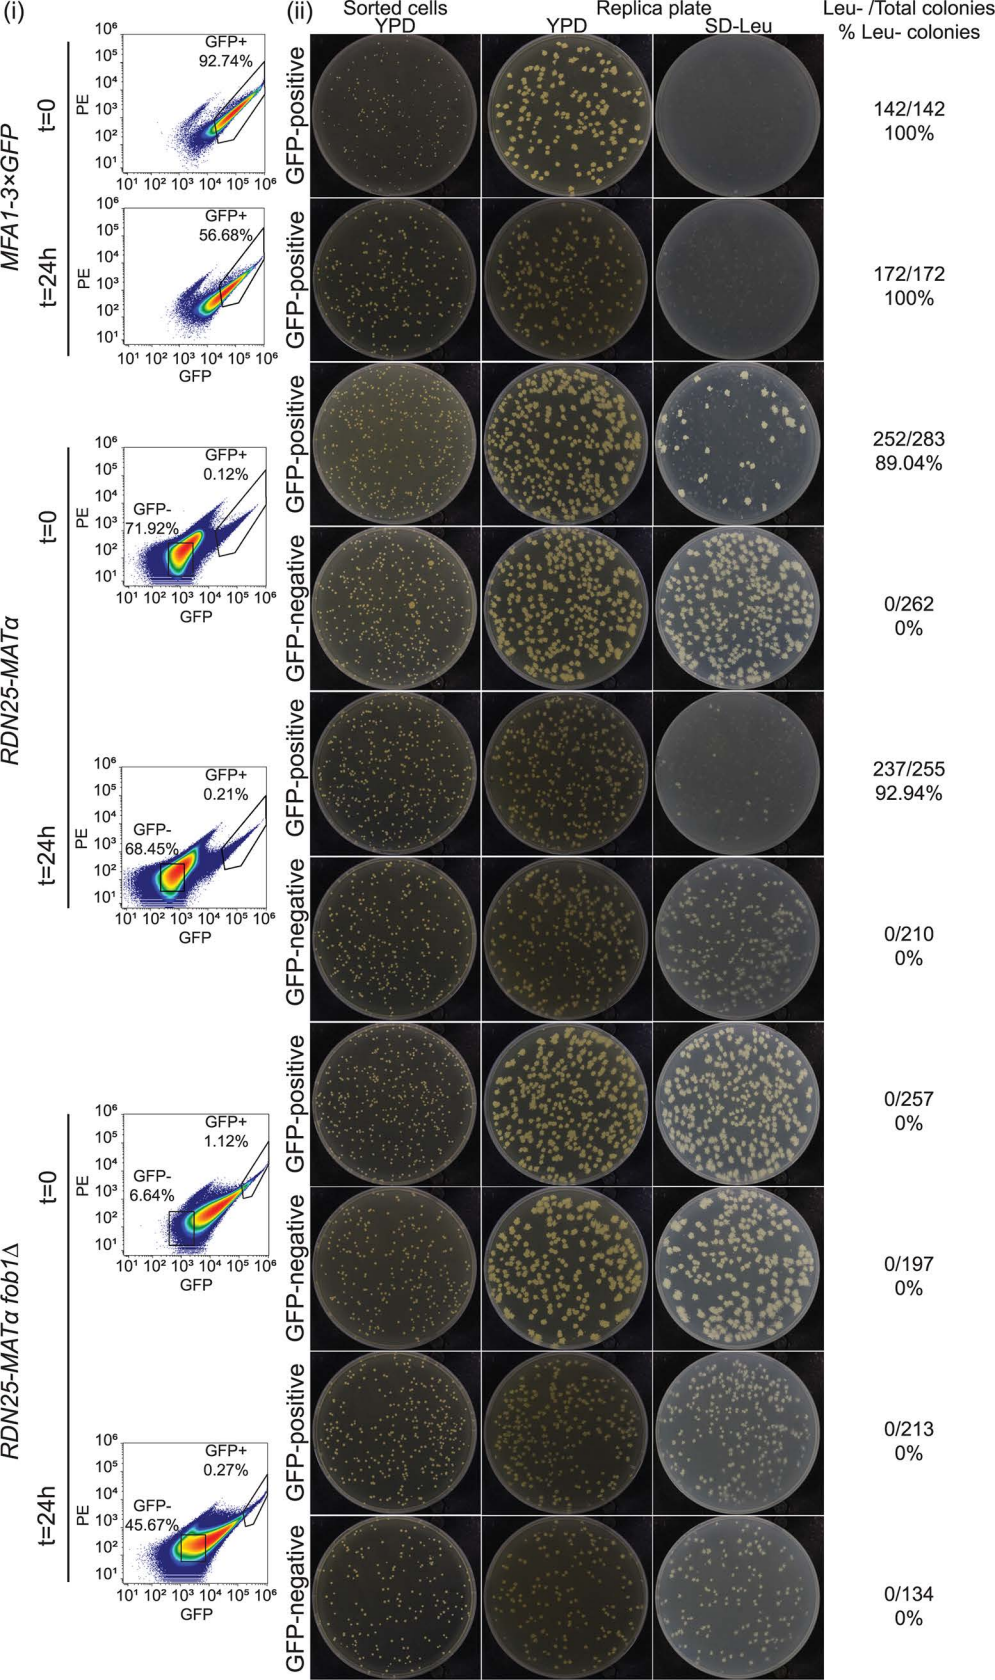

**Figure S3. Analysis of the loss of *MATALPHA-LEU2* in *fob1Δ* mutants.** (i) Flow cytometry data showing GFP-positive and GFP-negative cells sorted from the *MFA1-3×GFP*, and wild-type and *fob1Δ RDN25-MATα* strains at t=0 and t=24h. Sorted cells are gated by black polygons. (ii) Sorted GFP-positive and GFP-negative cells plated on YPD plates, and replica plated on to YPD and SD-Leu plates. Fraction of Leu- cells is indicated for each sorted population. 100% of the GFP-positive cells from the *RDN25-MATα fob1Δ* strain are Leu+.
