# Supplementary material
Source: publisher figshare collection journal article supplement (https://gsajournals.figshare.com/articles/dataset/_/14195492)
Supplement: Supplementary file 3 [file 1]

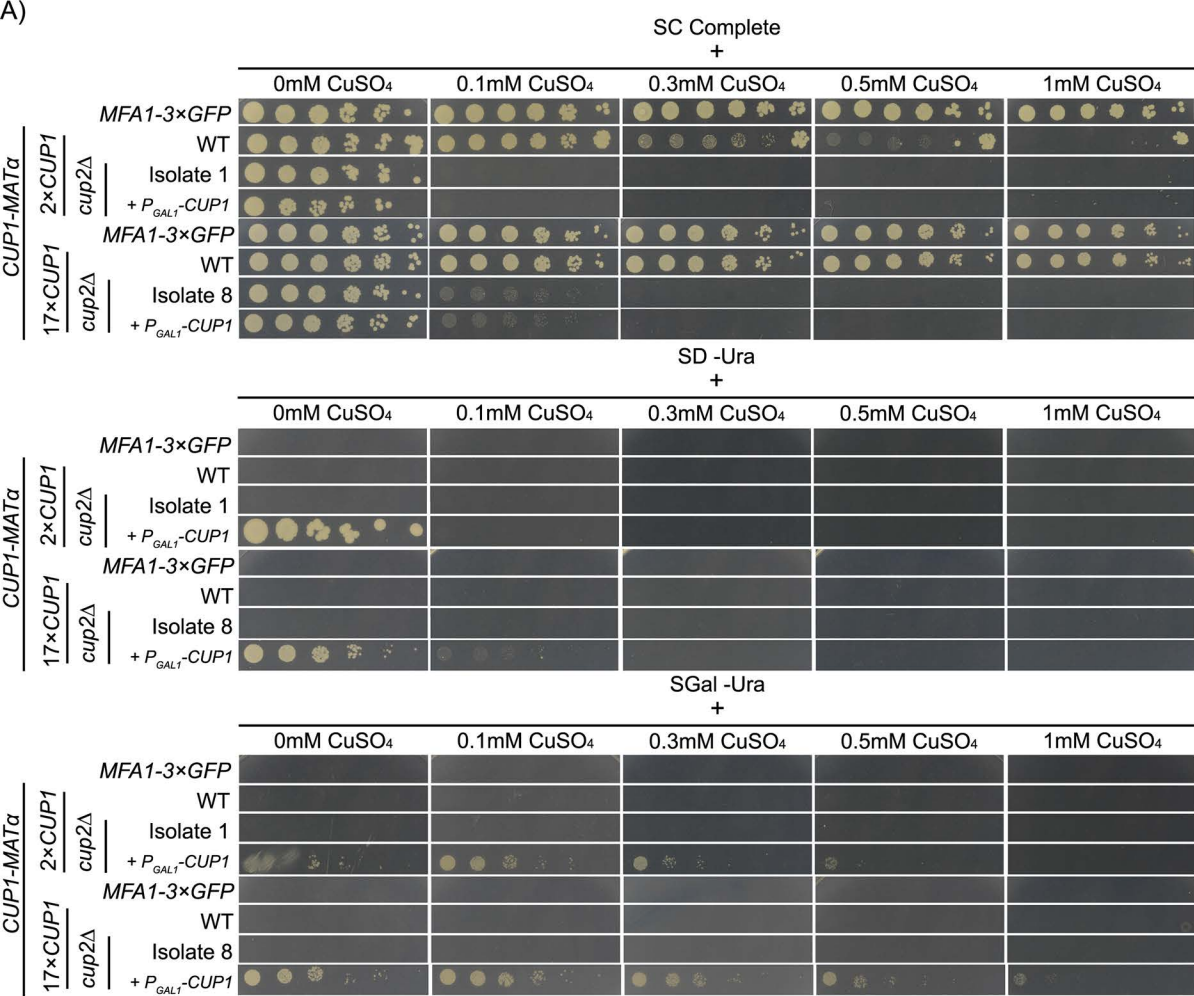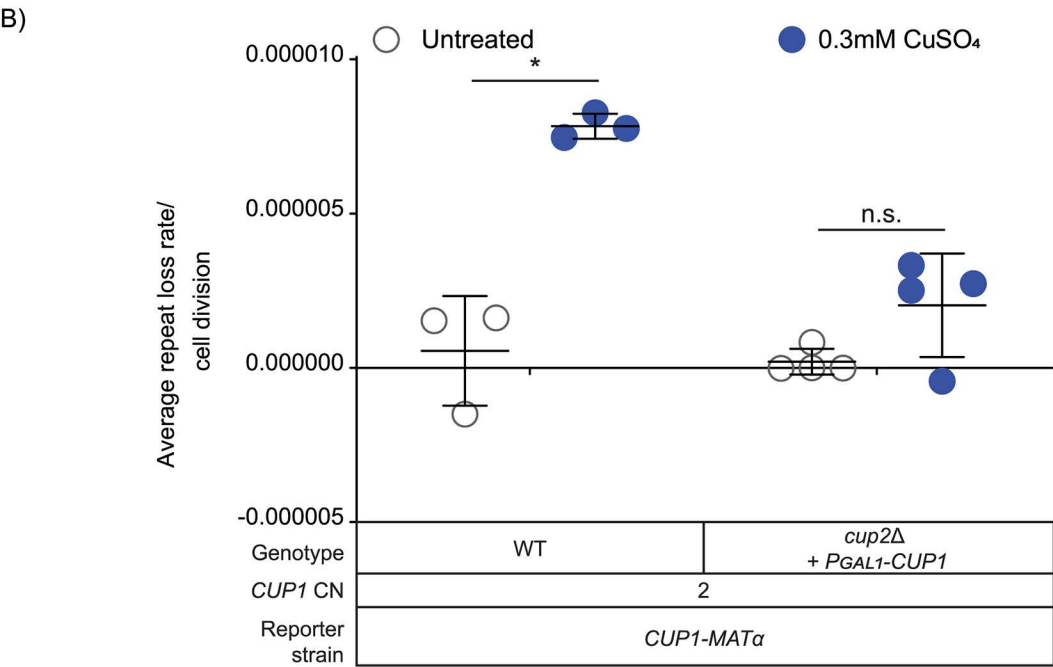

**Figure S7. Functional validation and additional supporting data for Figure 4D.** A) *CUP1-MAT $\alpha$  cup2 $\Delta$*  (+P<sub>GAL1</sub>-*CUP1*) strains are copper-resistant in galactose-containing medium. B) *CUP1* repeat loss rates in *CUP1-MAT $\alpha$  cup2 $\Delta$*  (+P<sub>GAL1</sub>-*CUP1*) strains with 2 $\times$ *CUP1*. Error bars represent standard deviation based on 3-4 biological replicates. Statistical significance was calculated using a standard 2-tailed t-test. \* - p<0.05, n. s. – not significant.
